# Supplementary material
Source: PubMed Central journal article supplement (PMC2763325)

**Supporting Information.** Directed Borylation by Electrophilic Activation of Benzylamine Boranes

Timothy S. De Vries, Aleksandrs Prokofjevs, Jeremy N. Harvey\* and Edwin Vedejs\*

NMR Spectra for New Compounds

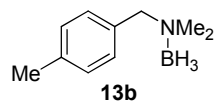

$^1\text{H}$  NMR ( $\text{CDCl}_3$ )

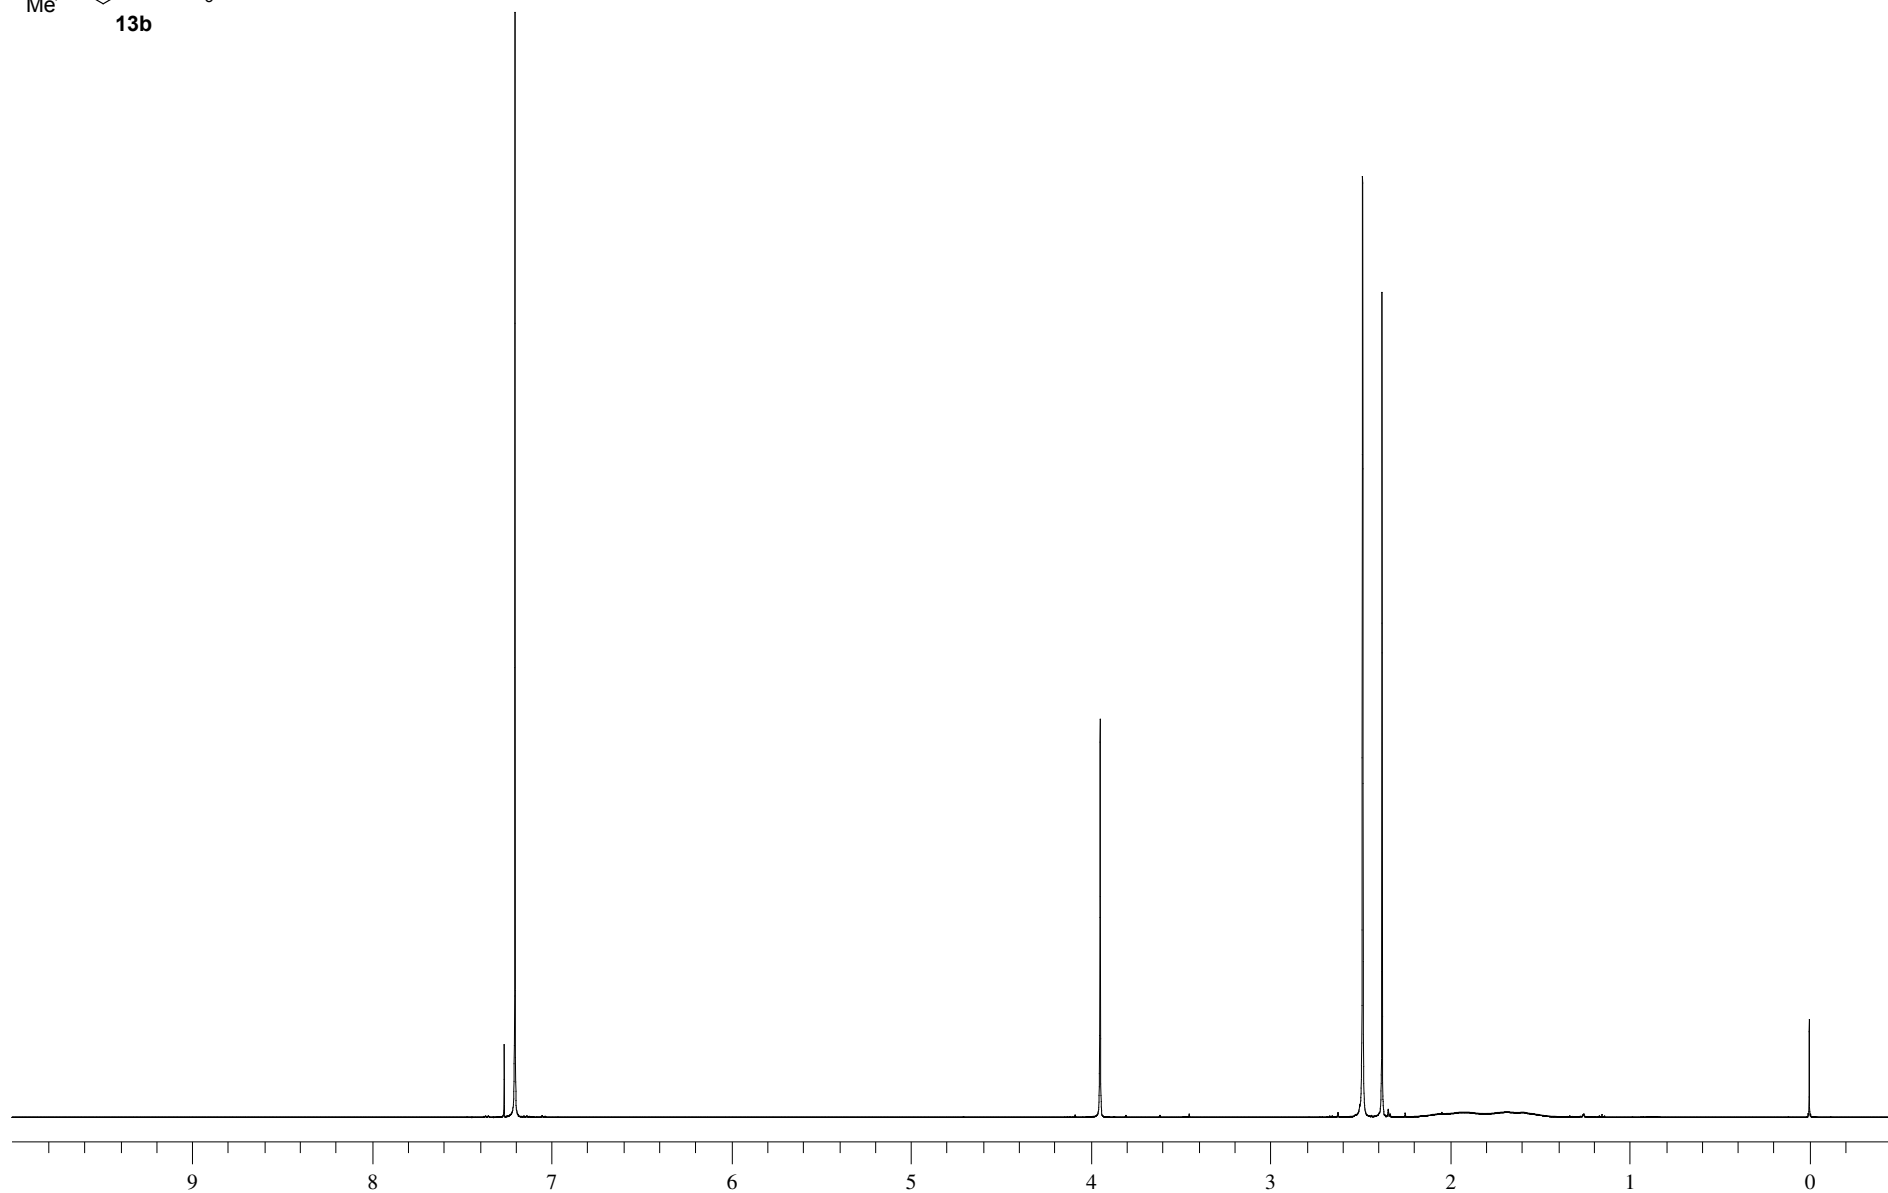

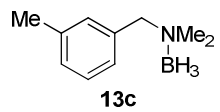

$^1\text{H NMR (CDCl}_3)$

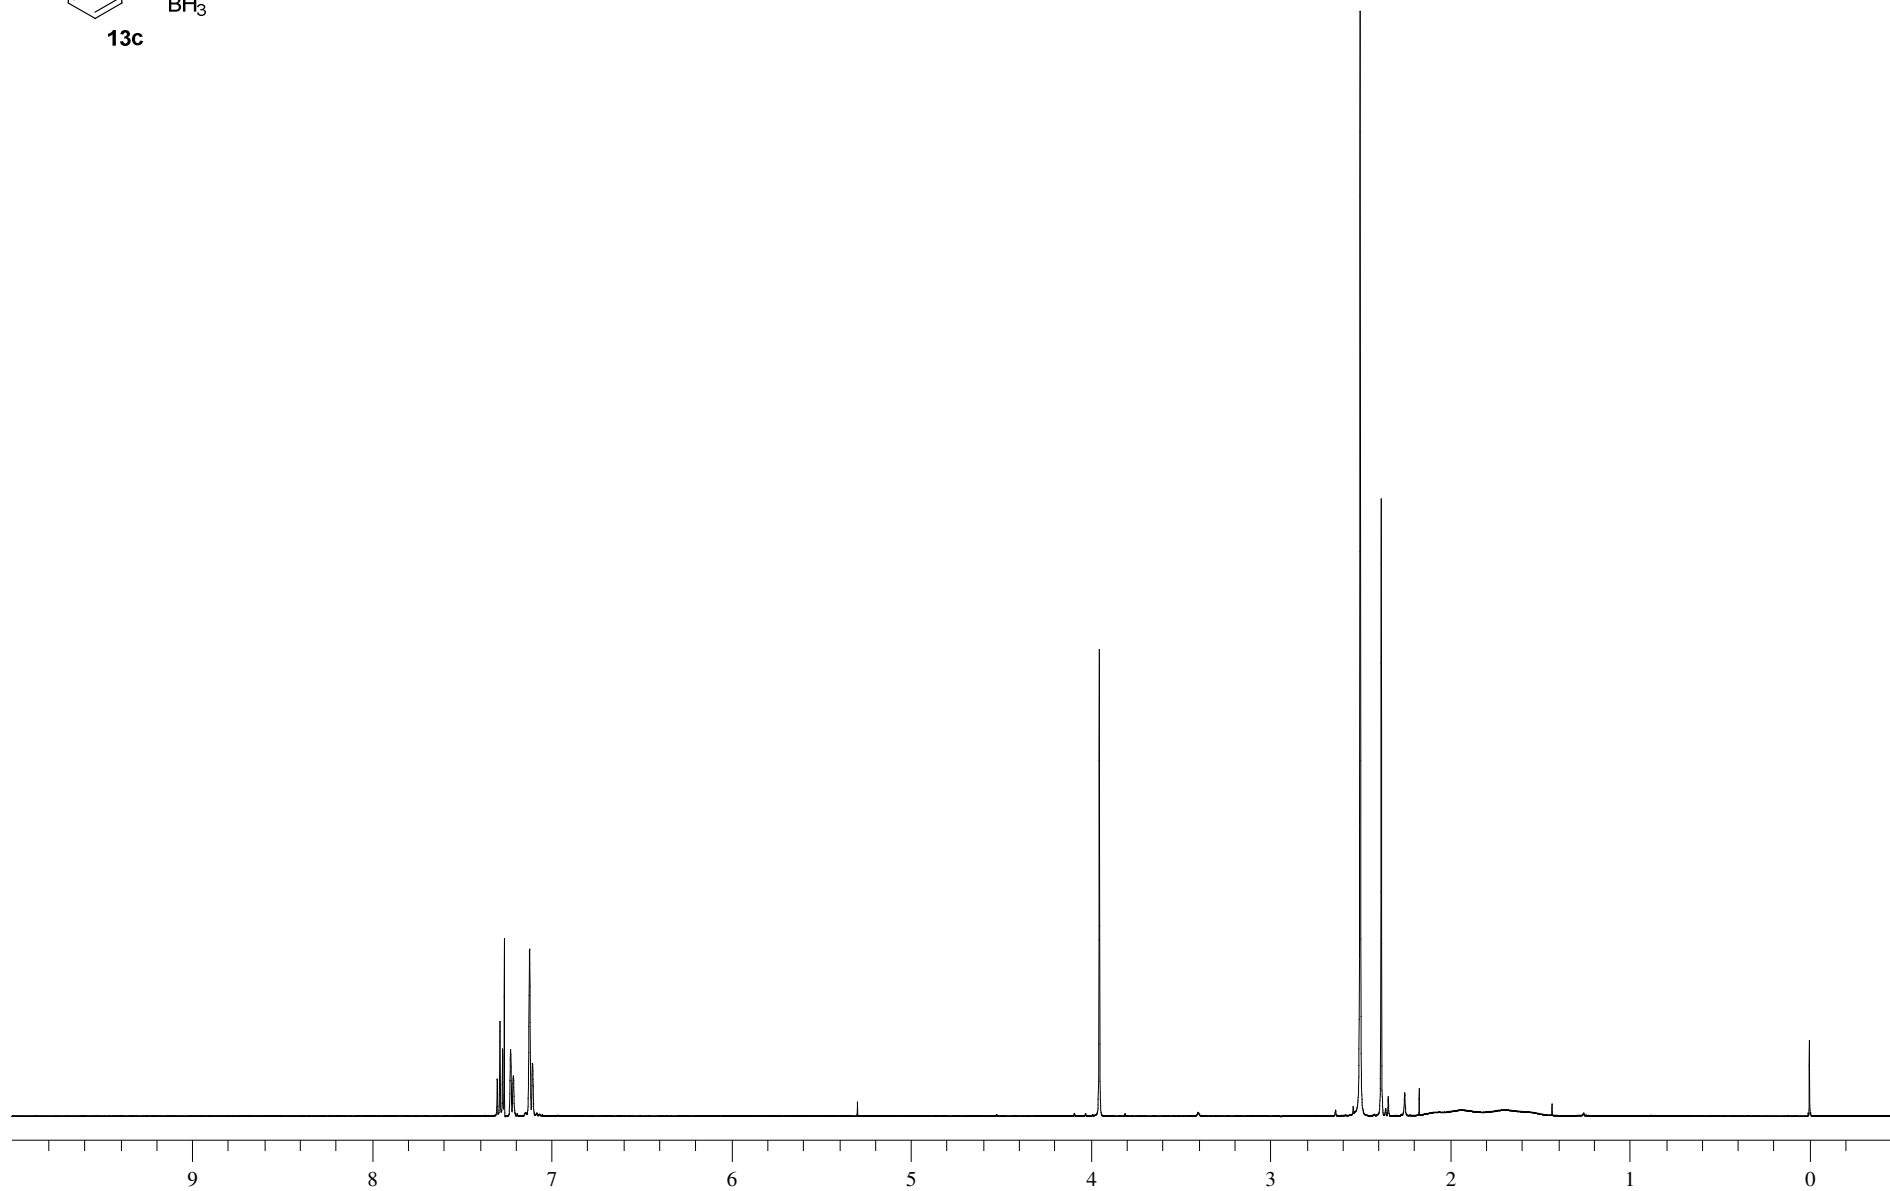

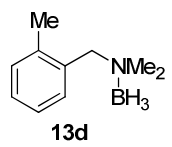

$^1\text{H}$  NMR ( $\text{CDCl}_3$ )

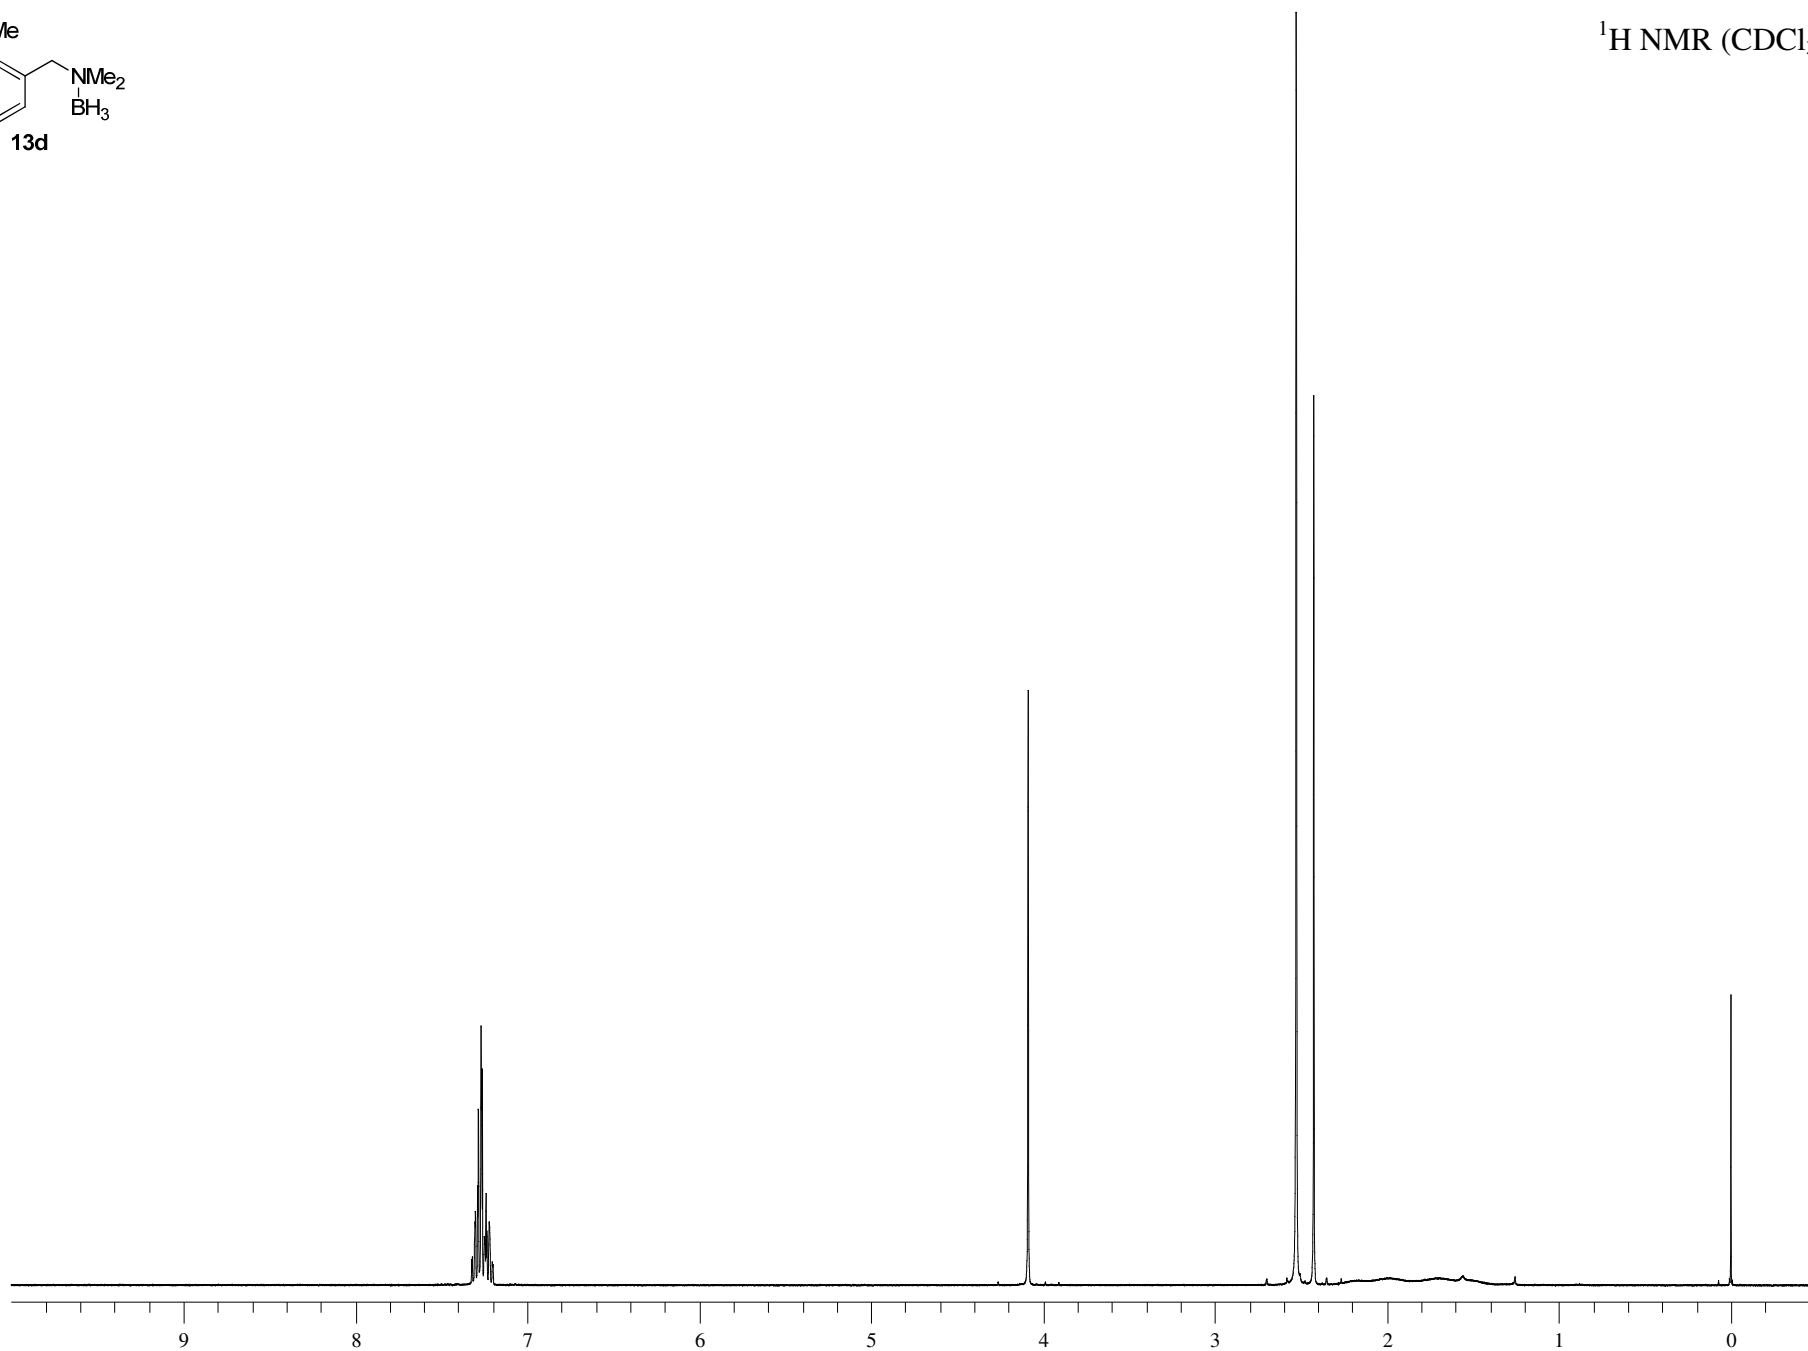

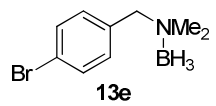

<sup>1</sup>H NMR (CDCl<sub>3</sub>)

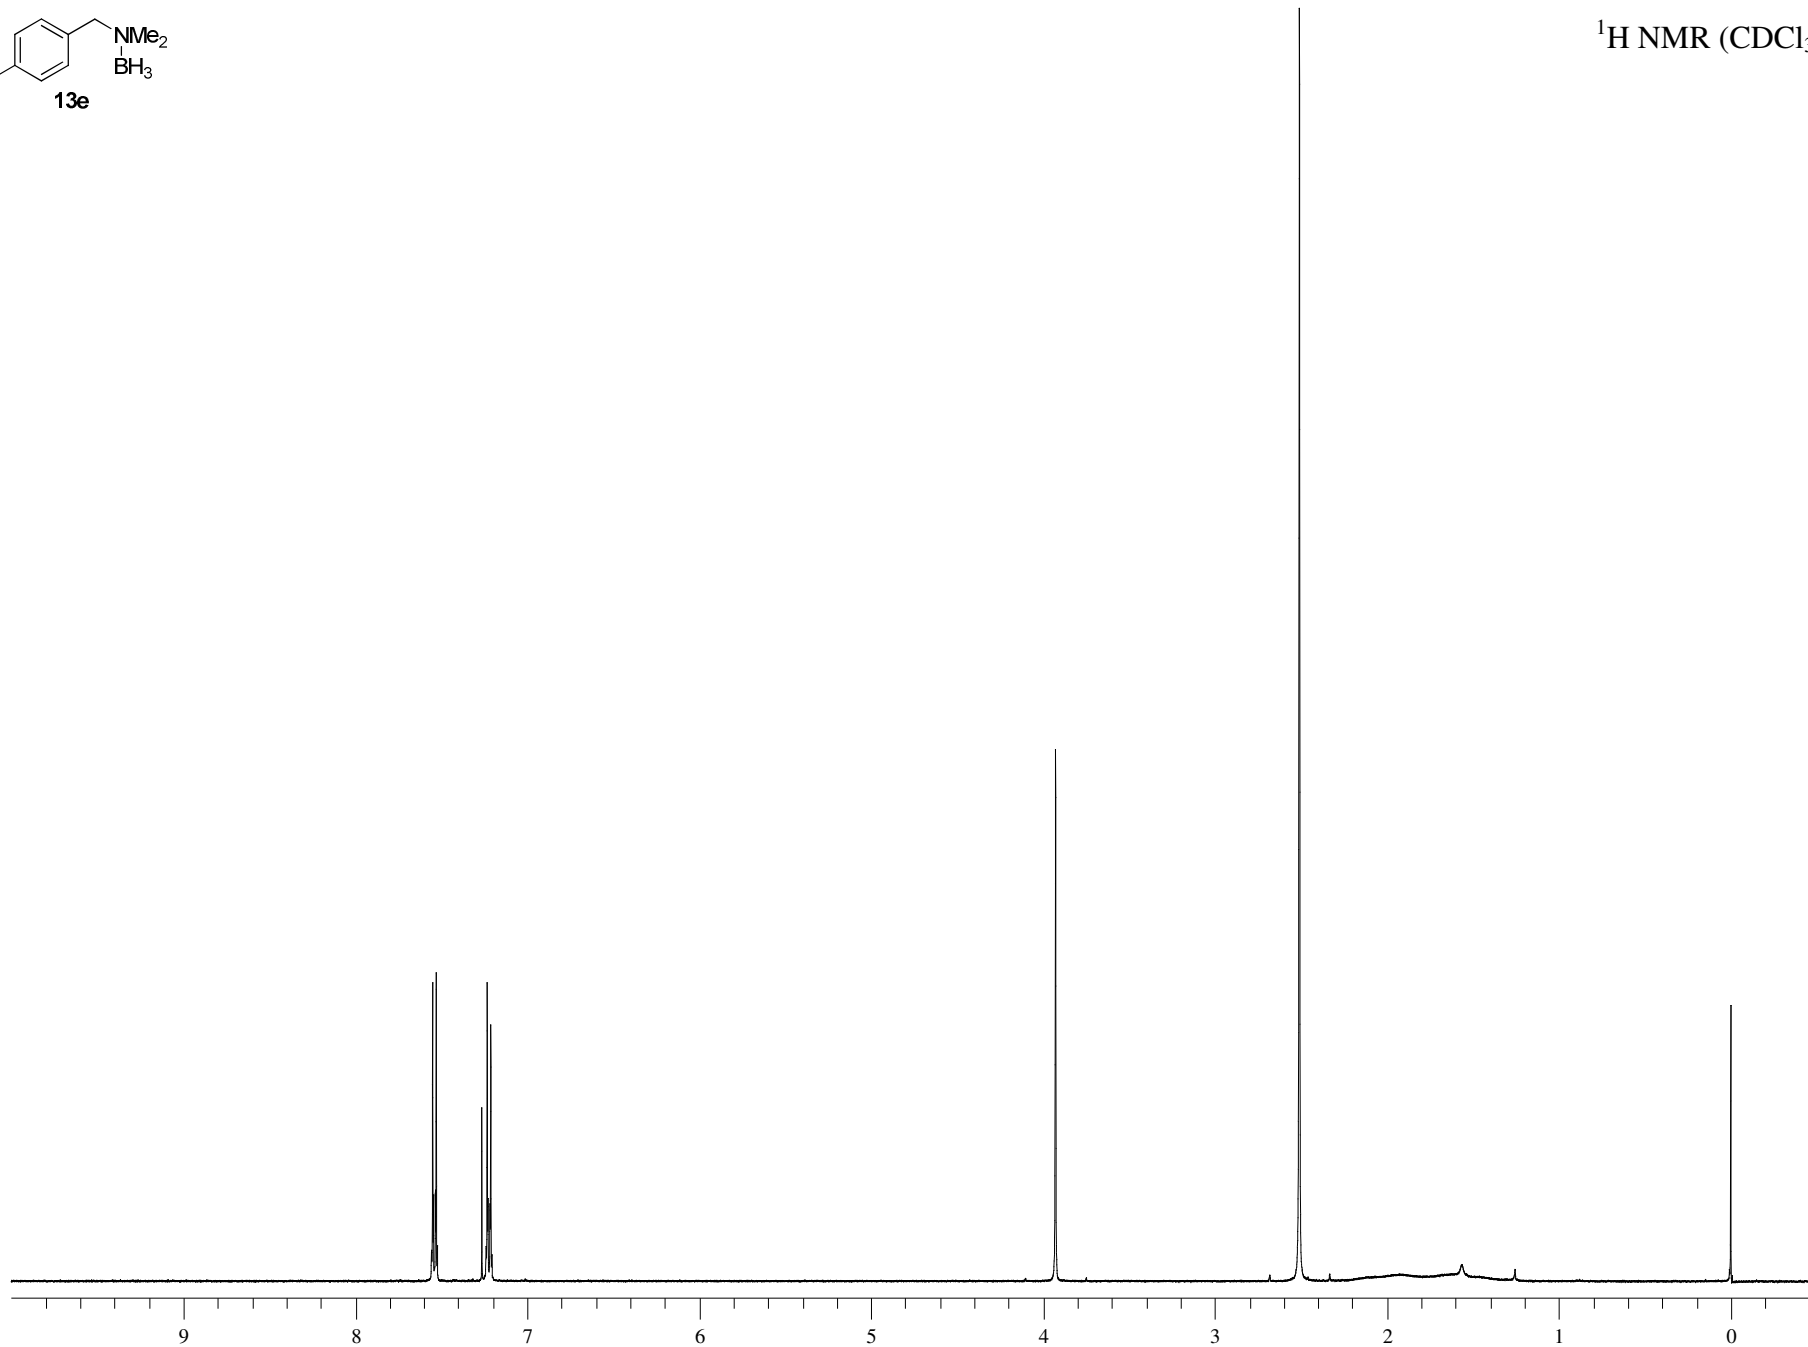

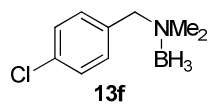

<sup>1</sup>H NMR (CDCl<sub>3</sub>)

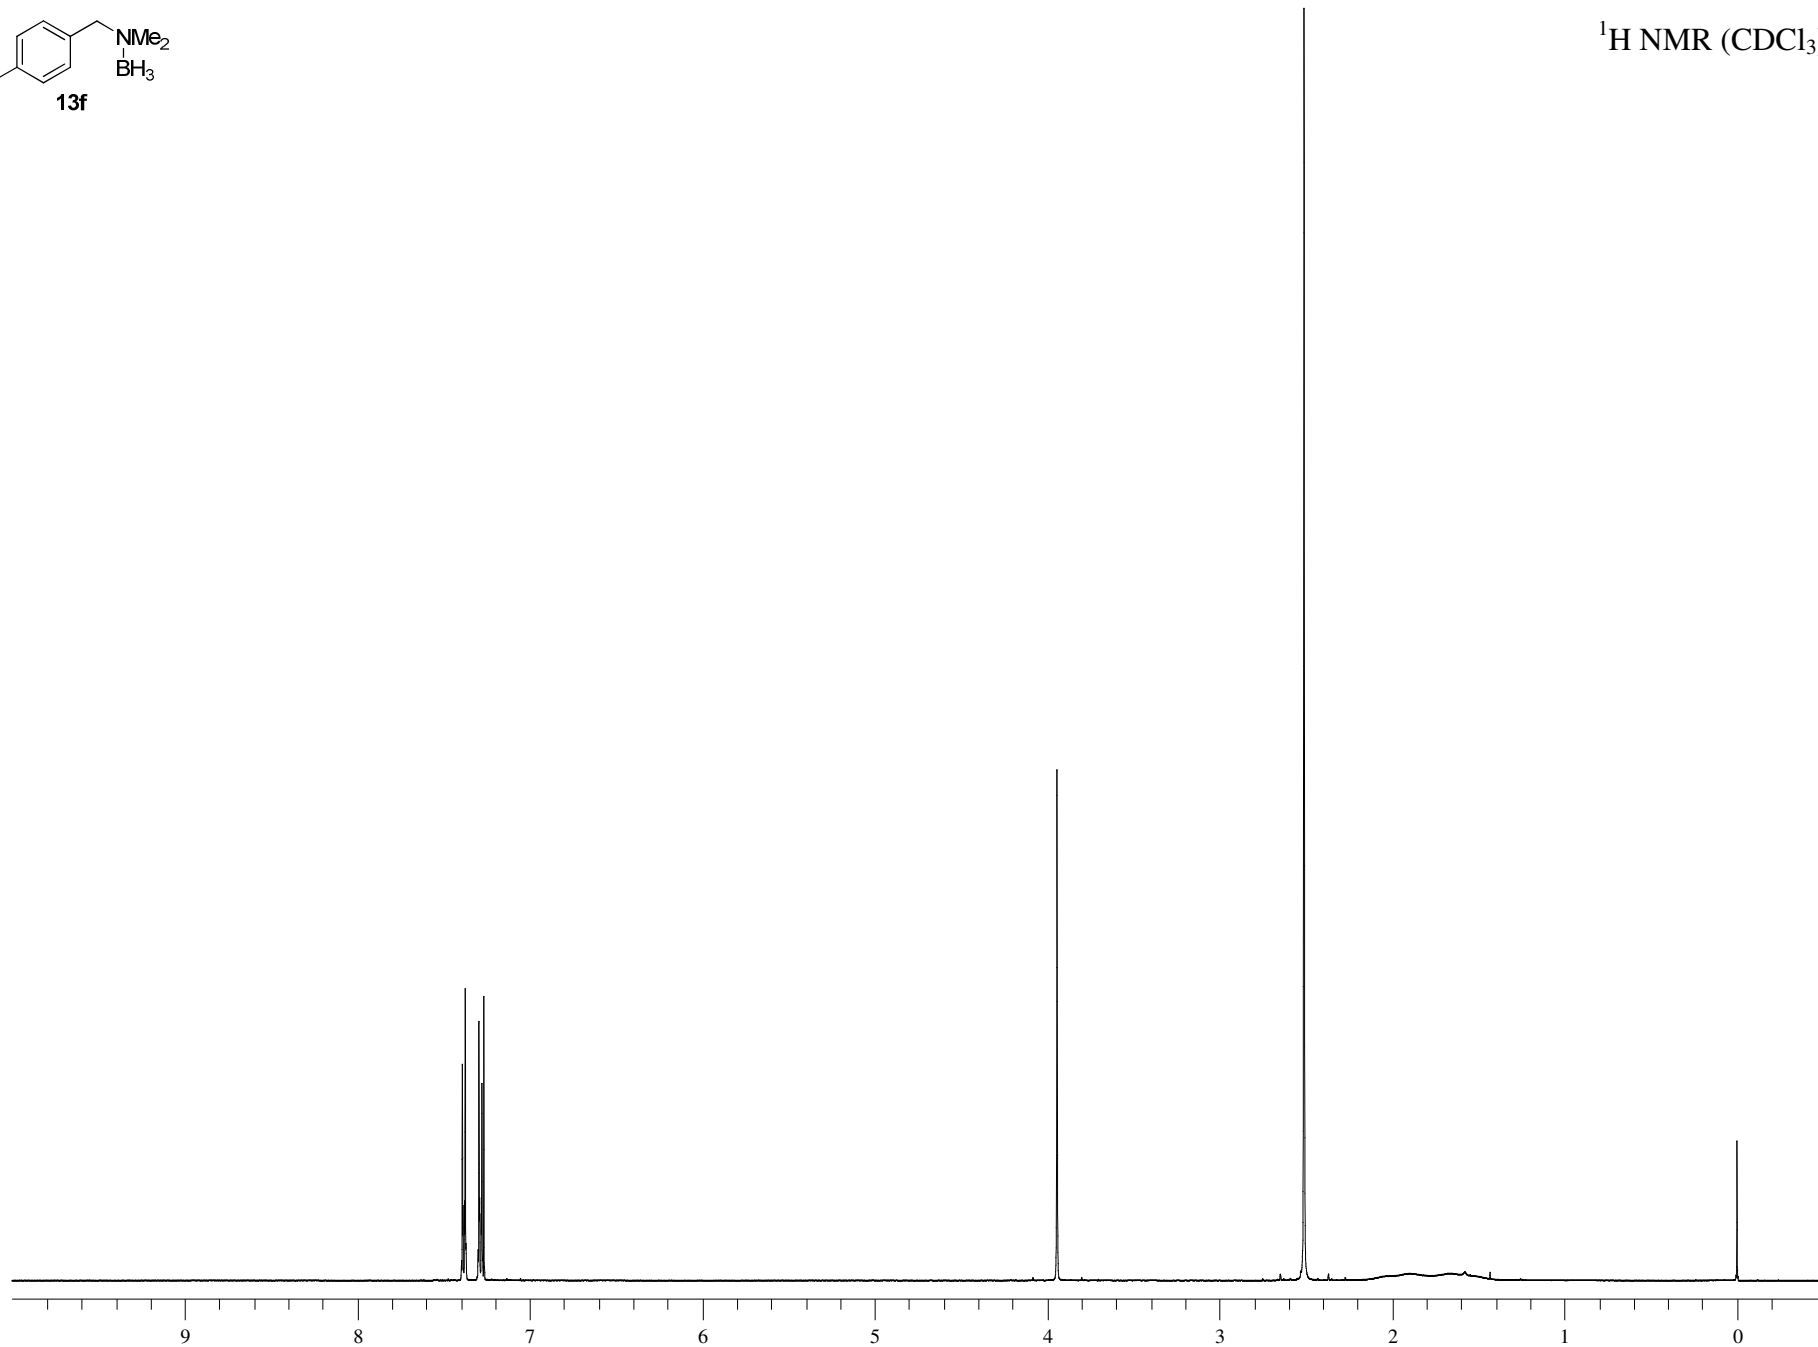

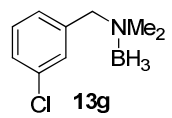

$^1\text{H}$  NMR ( $\text{CDCl}_3$ )

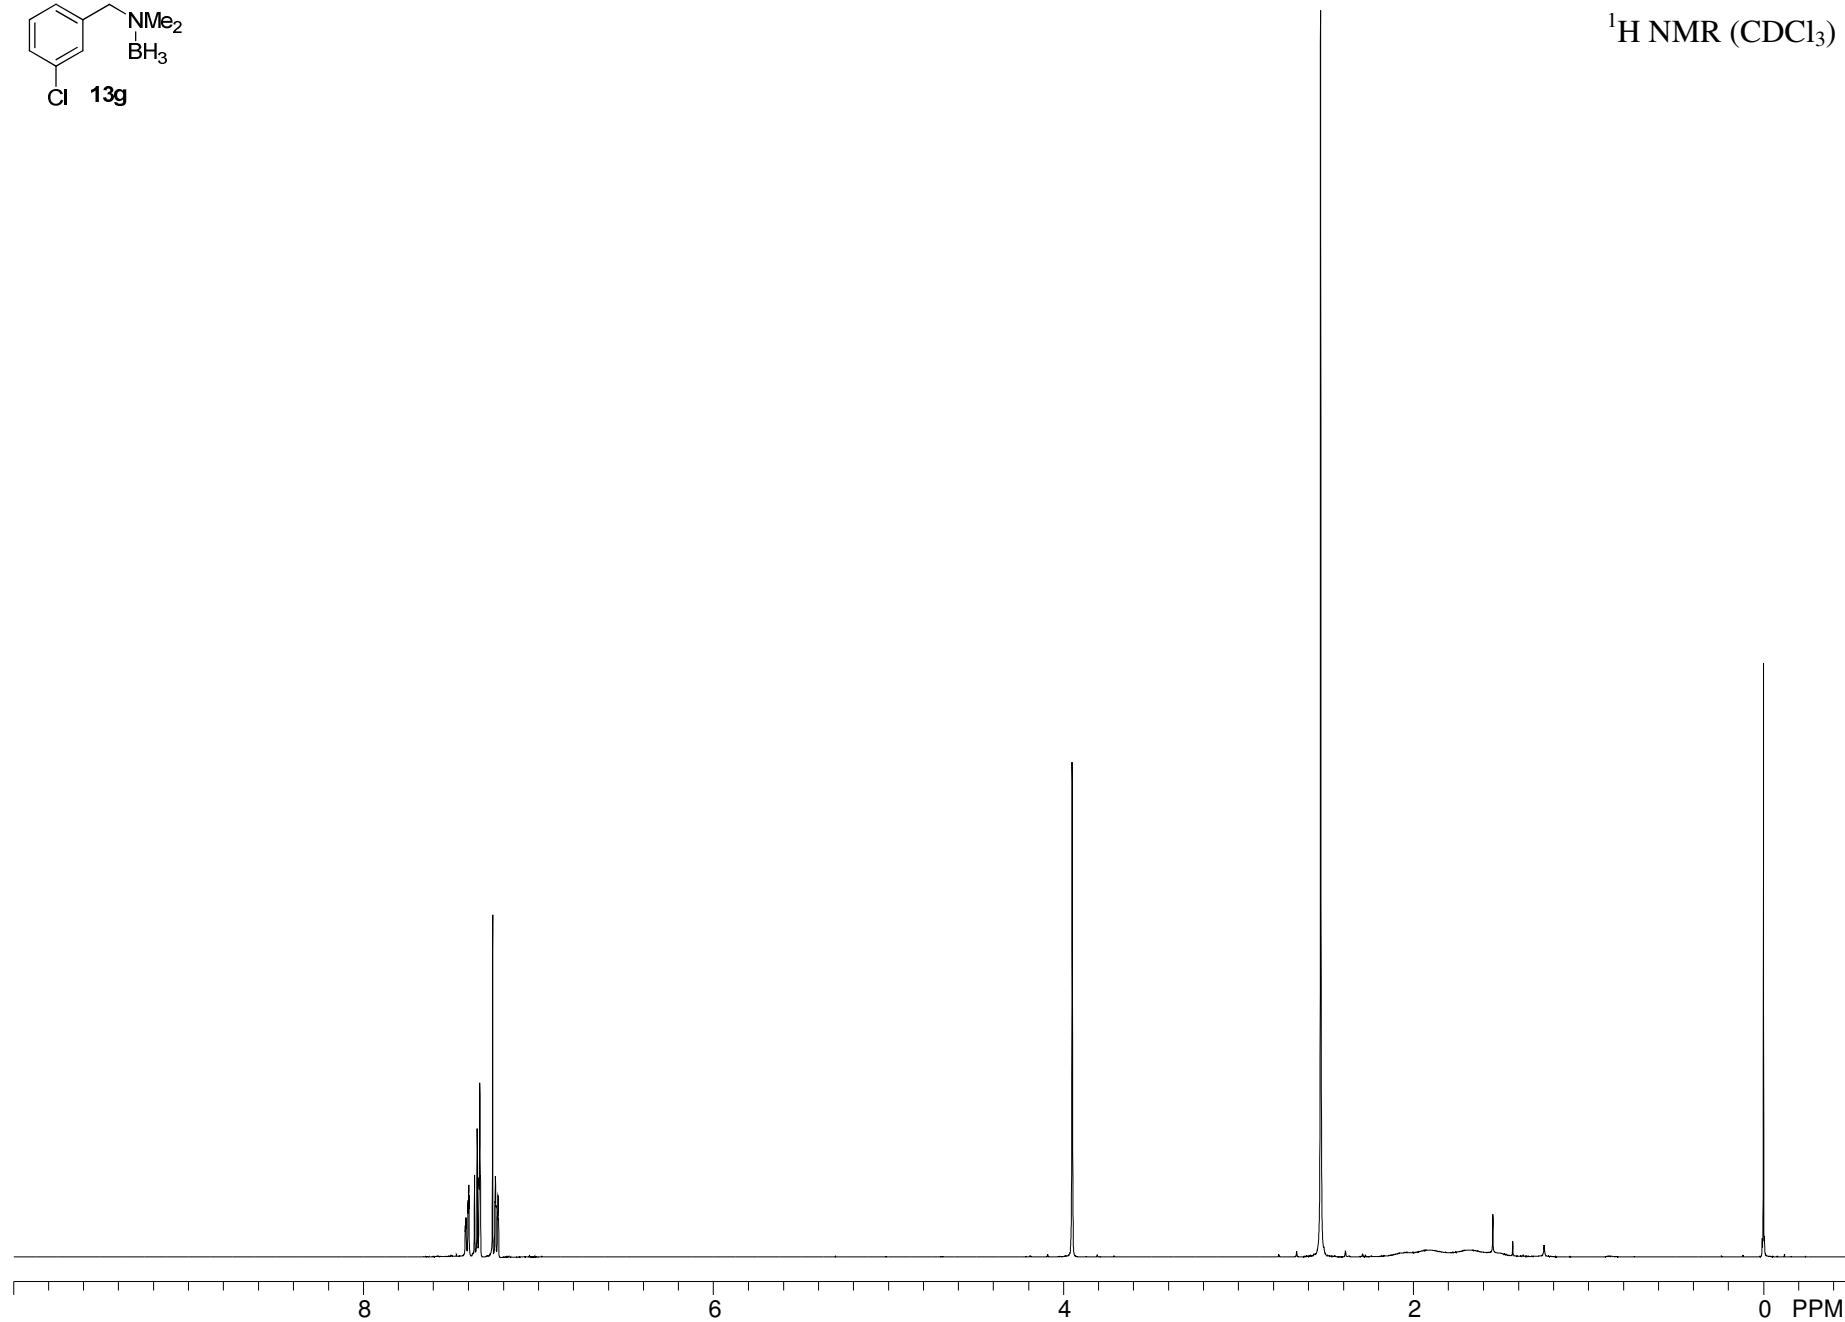

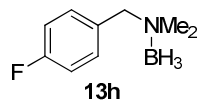

$^1\text{H NMR (CDCl}_3)$

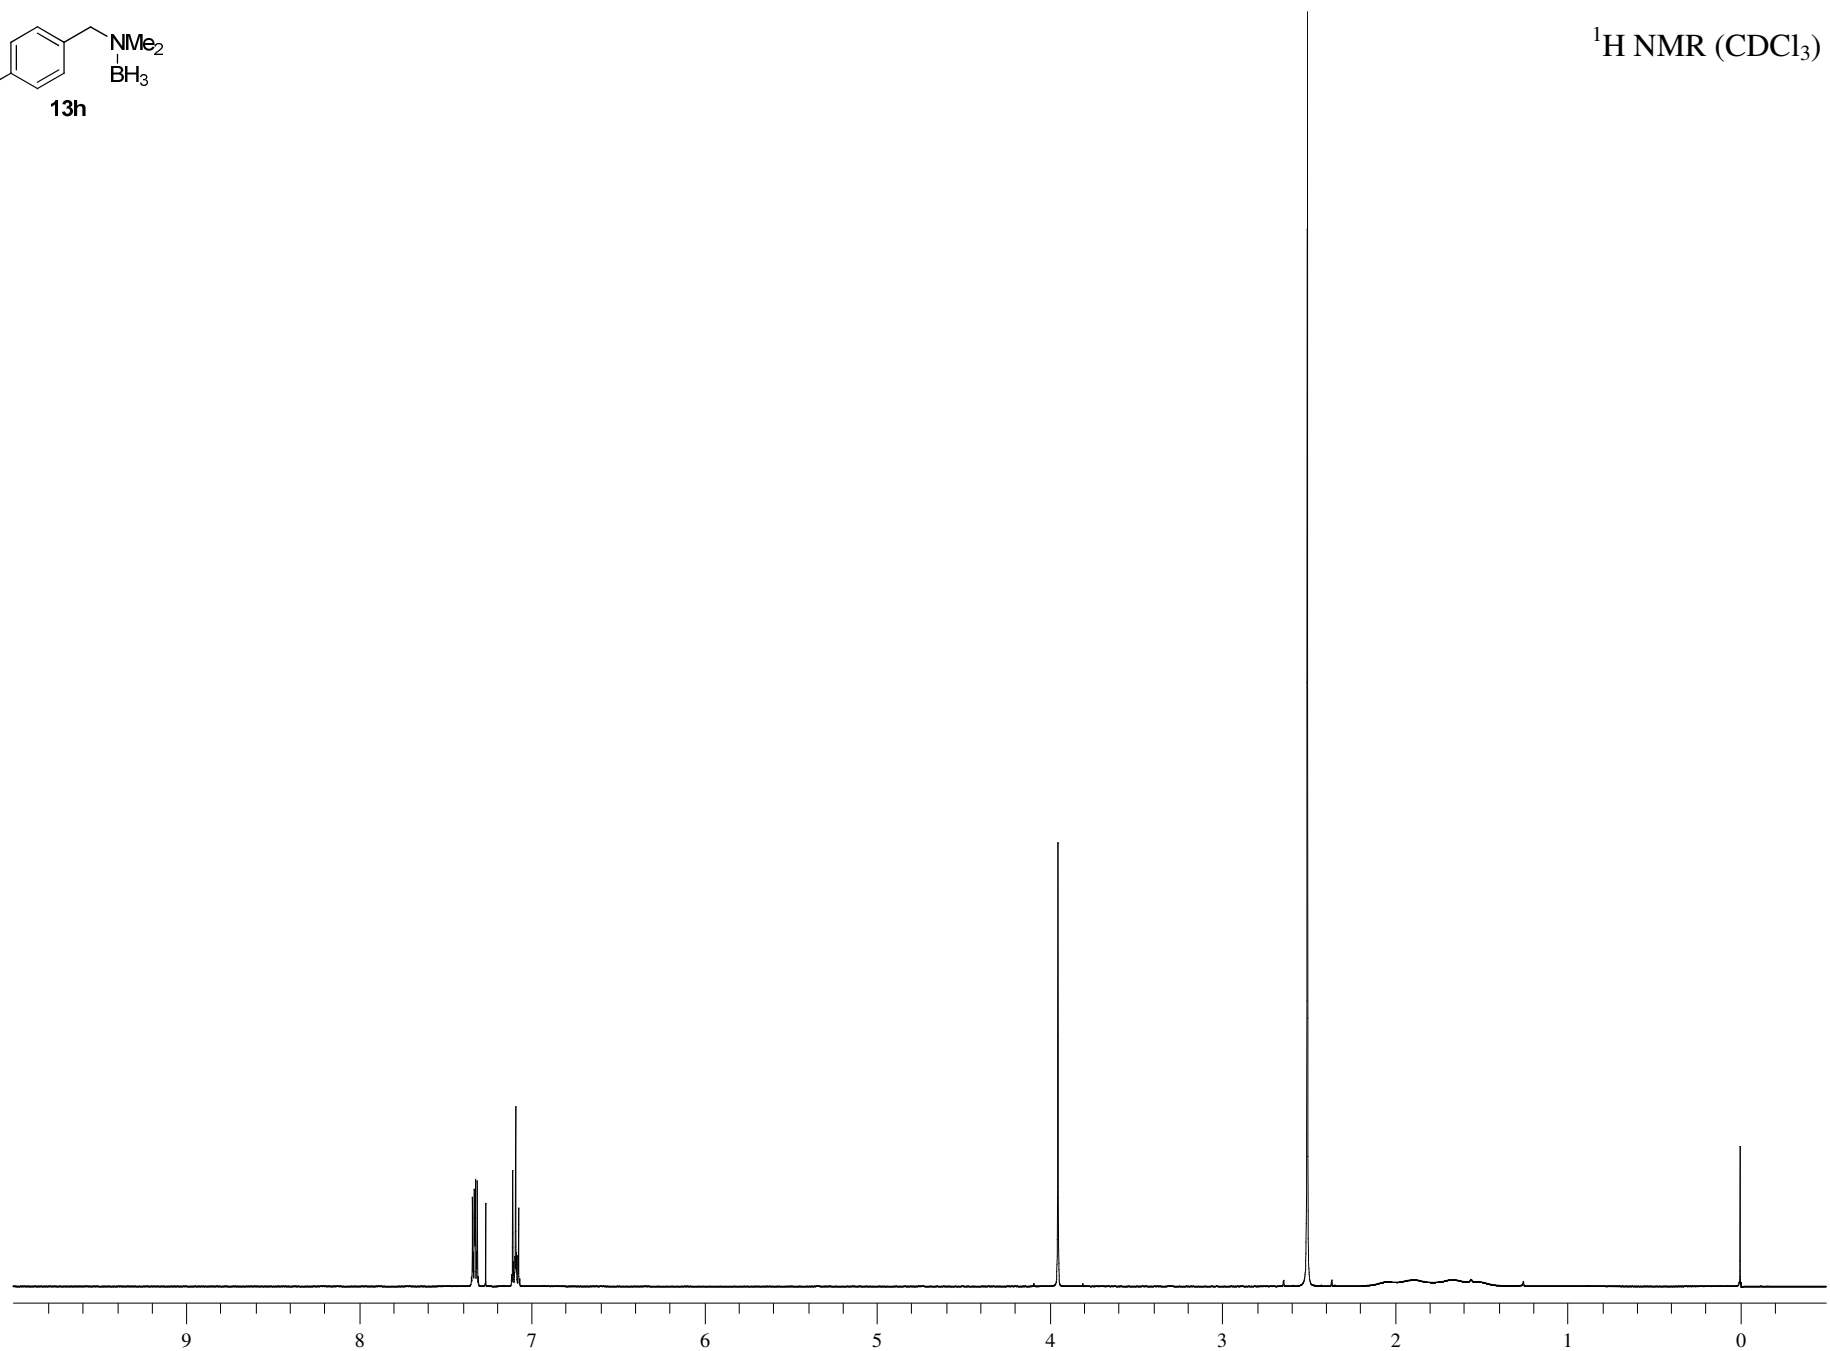



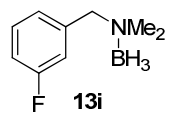

<sup>1</sup>H NMR (CDCl<sub>3</sub>)

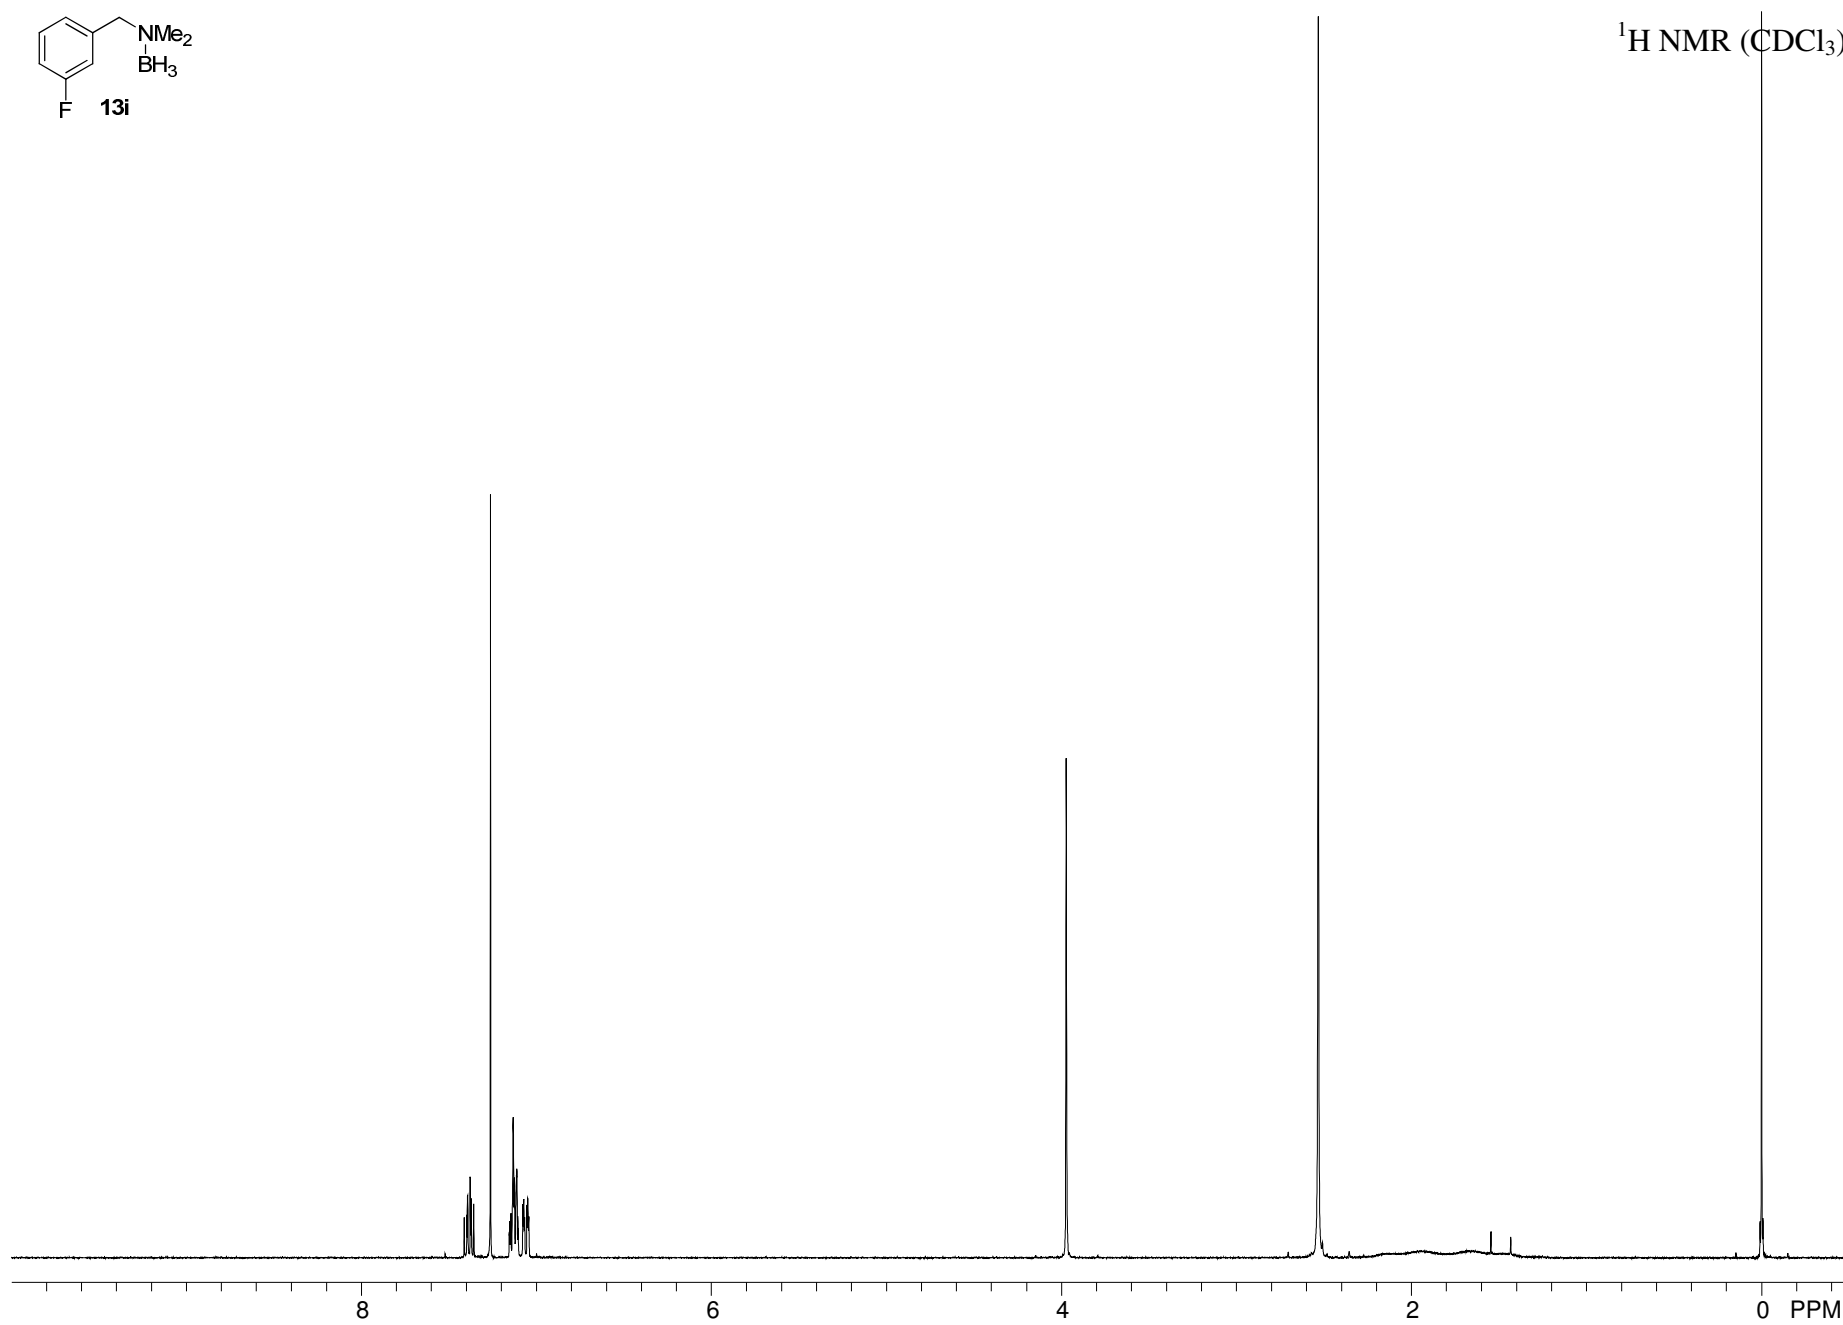

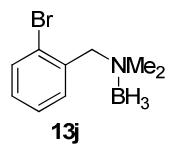

$^1\text{H NMR}$  ( $\text{CDCl}_3$ )

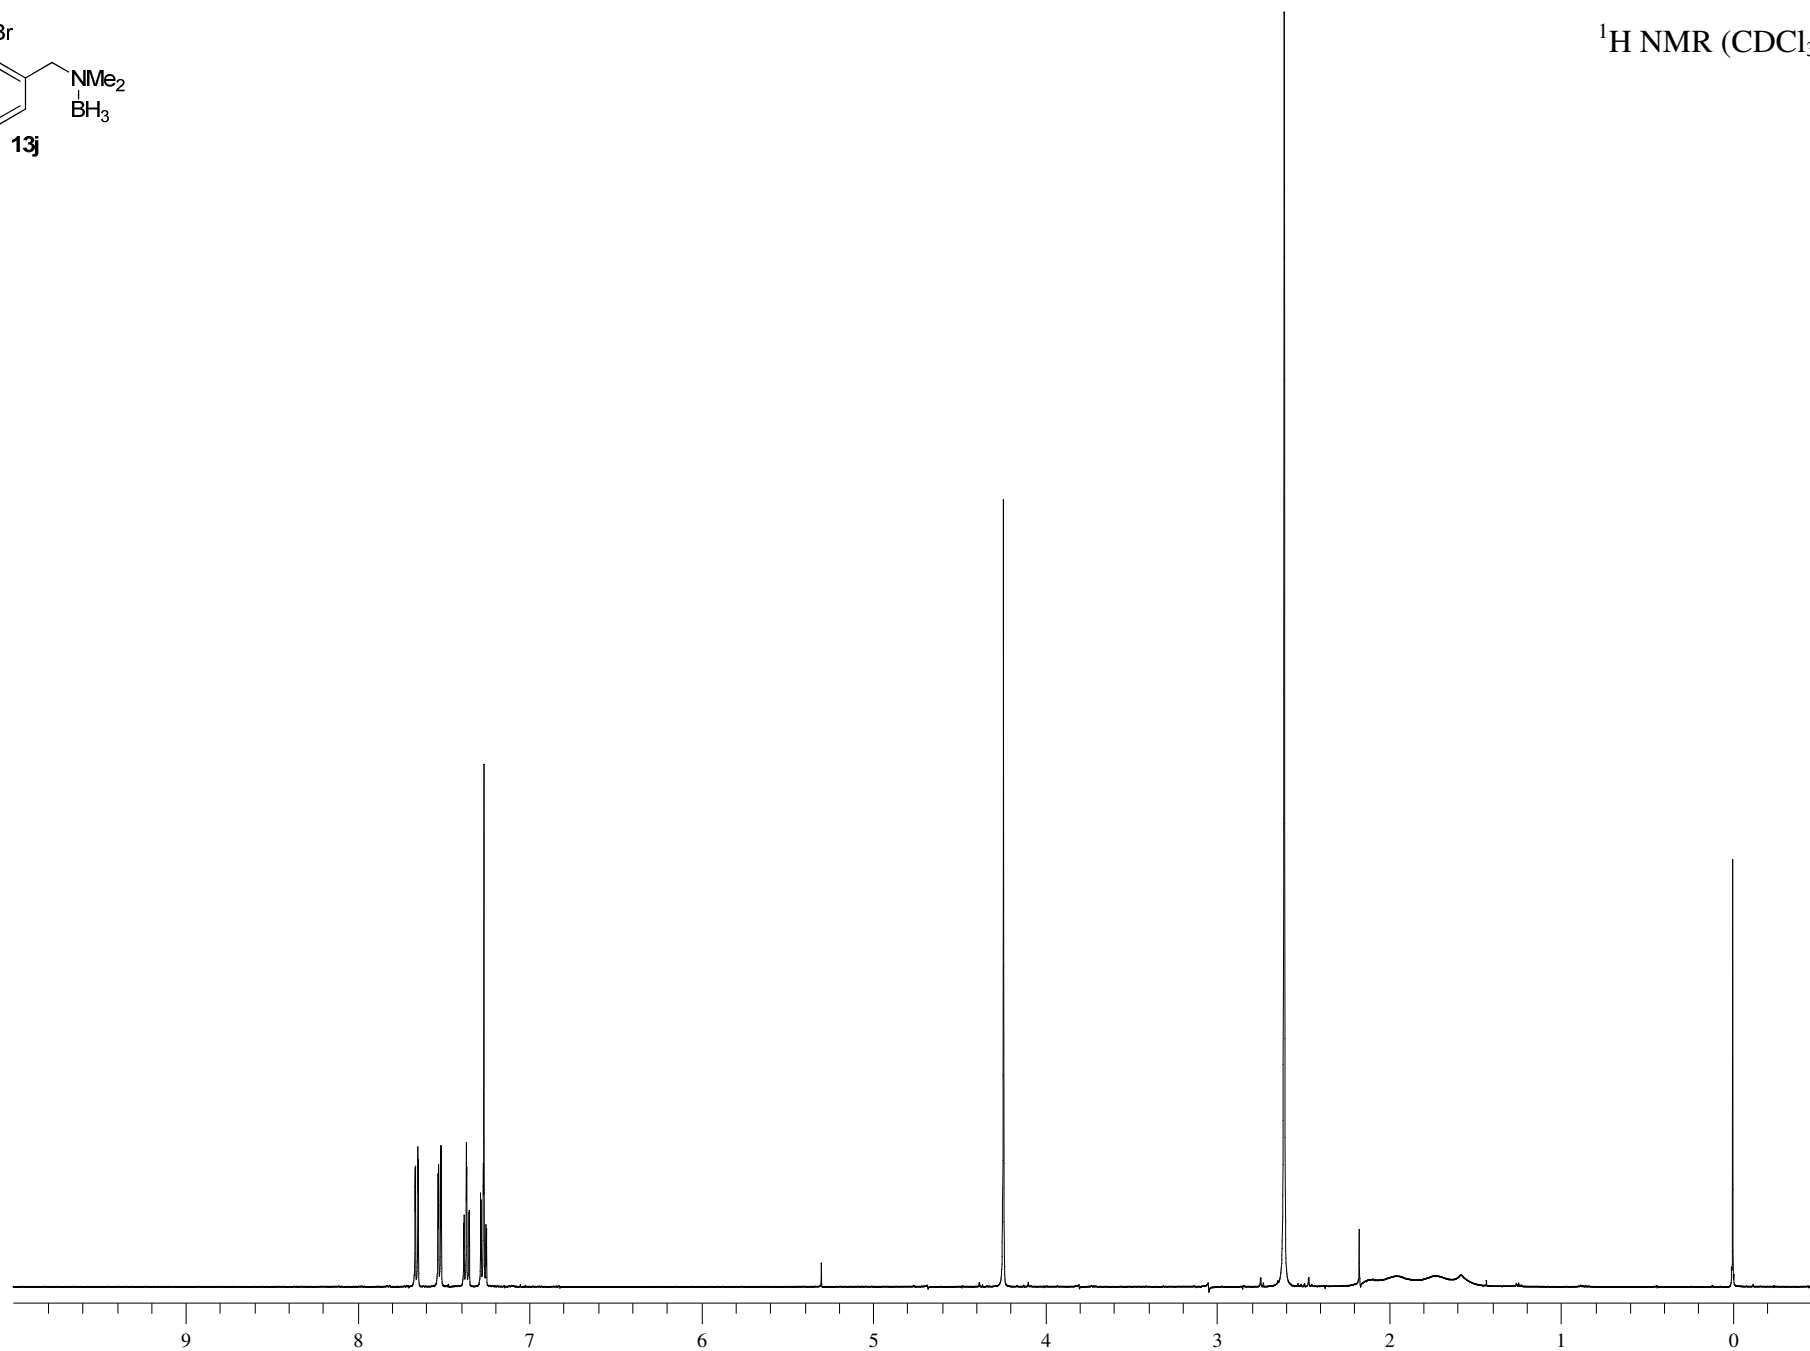

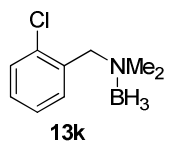

$^1\text{H}$  NMR ( $\text{CDCl}_3$ )

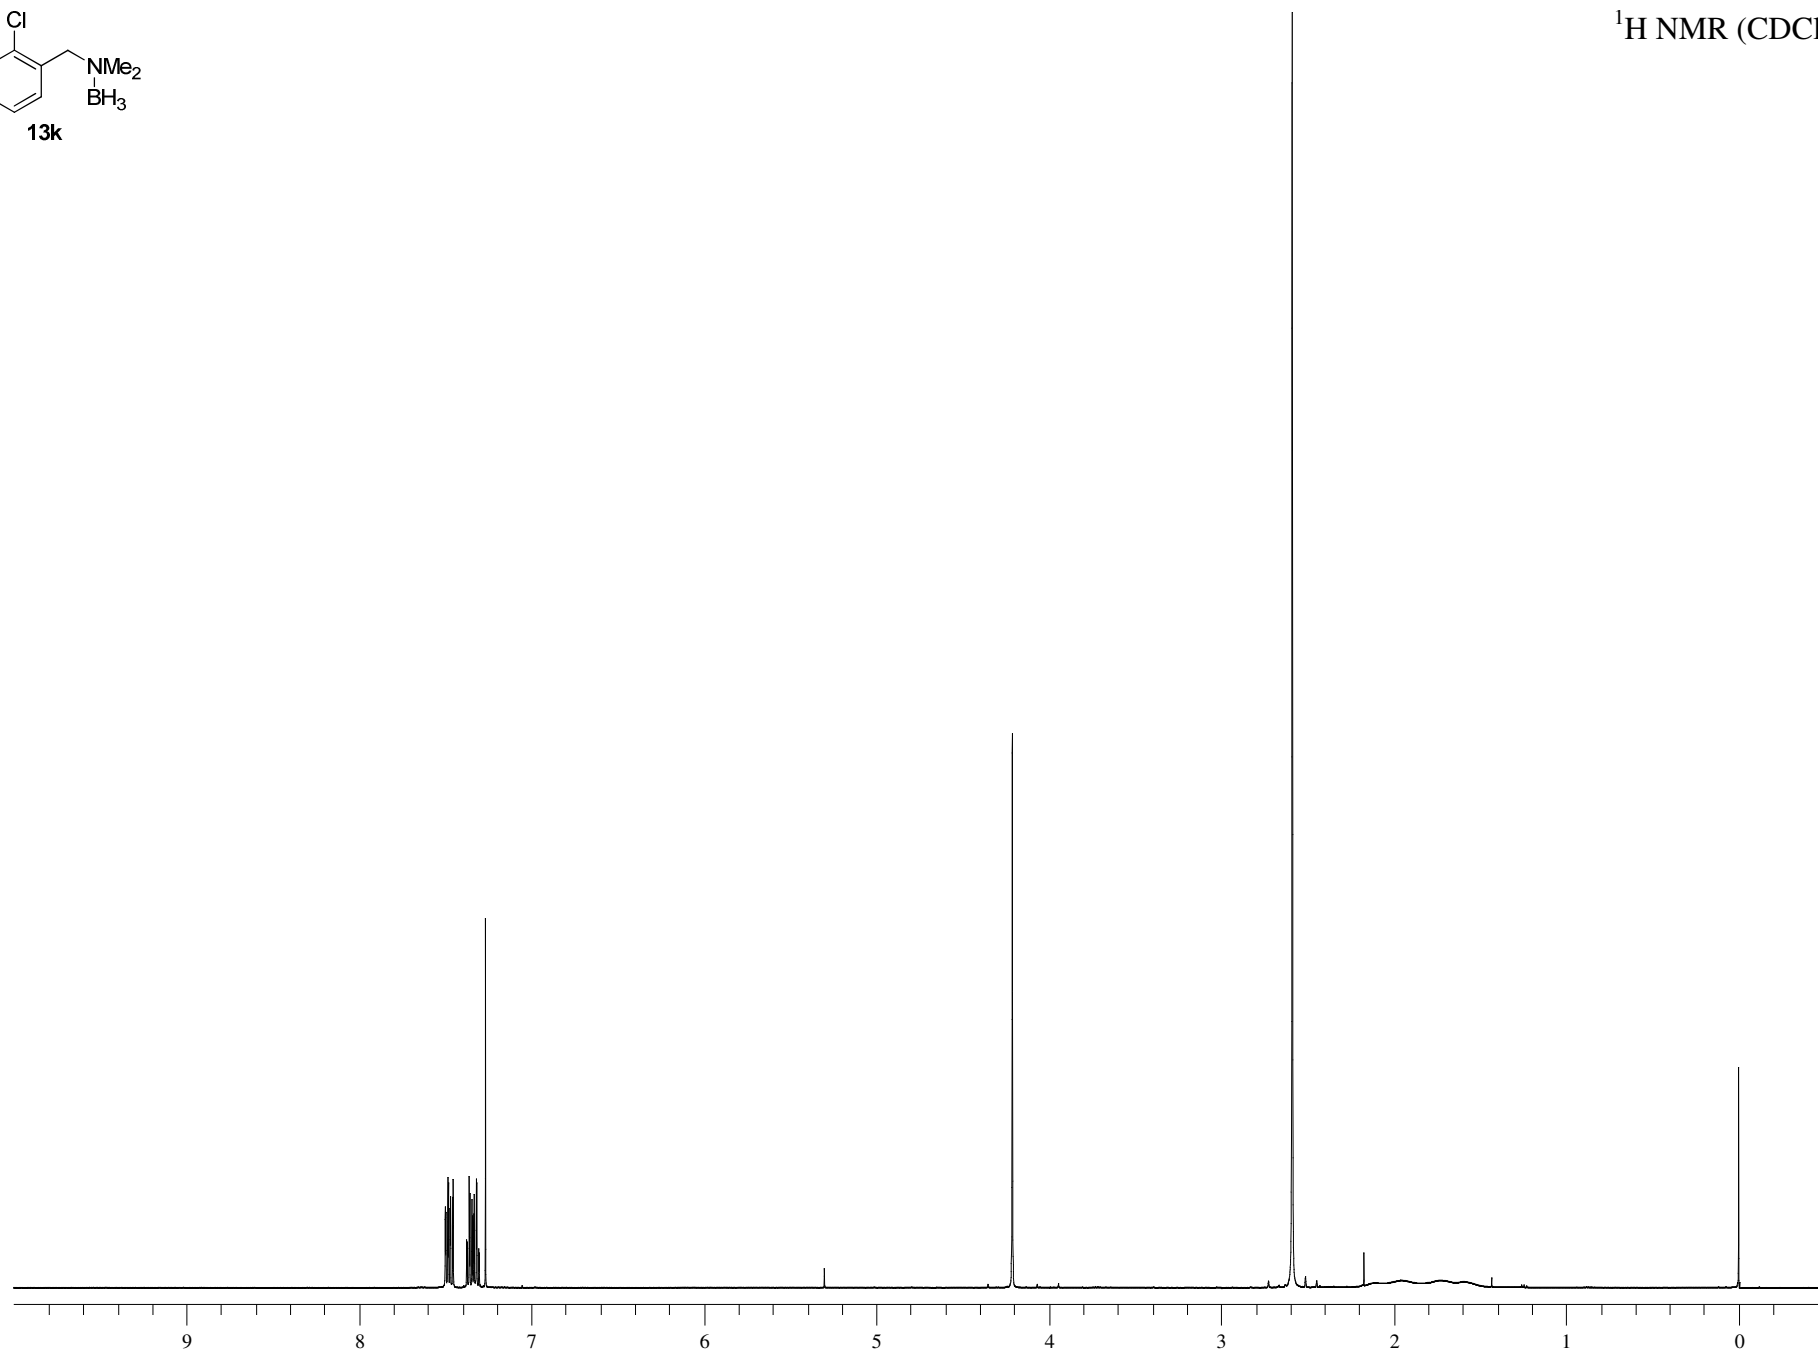

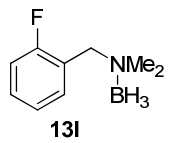

$^1\text{H NMR (CDCl}_3)$

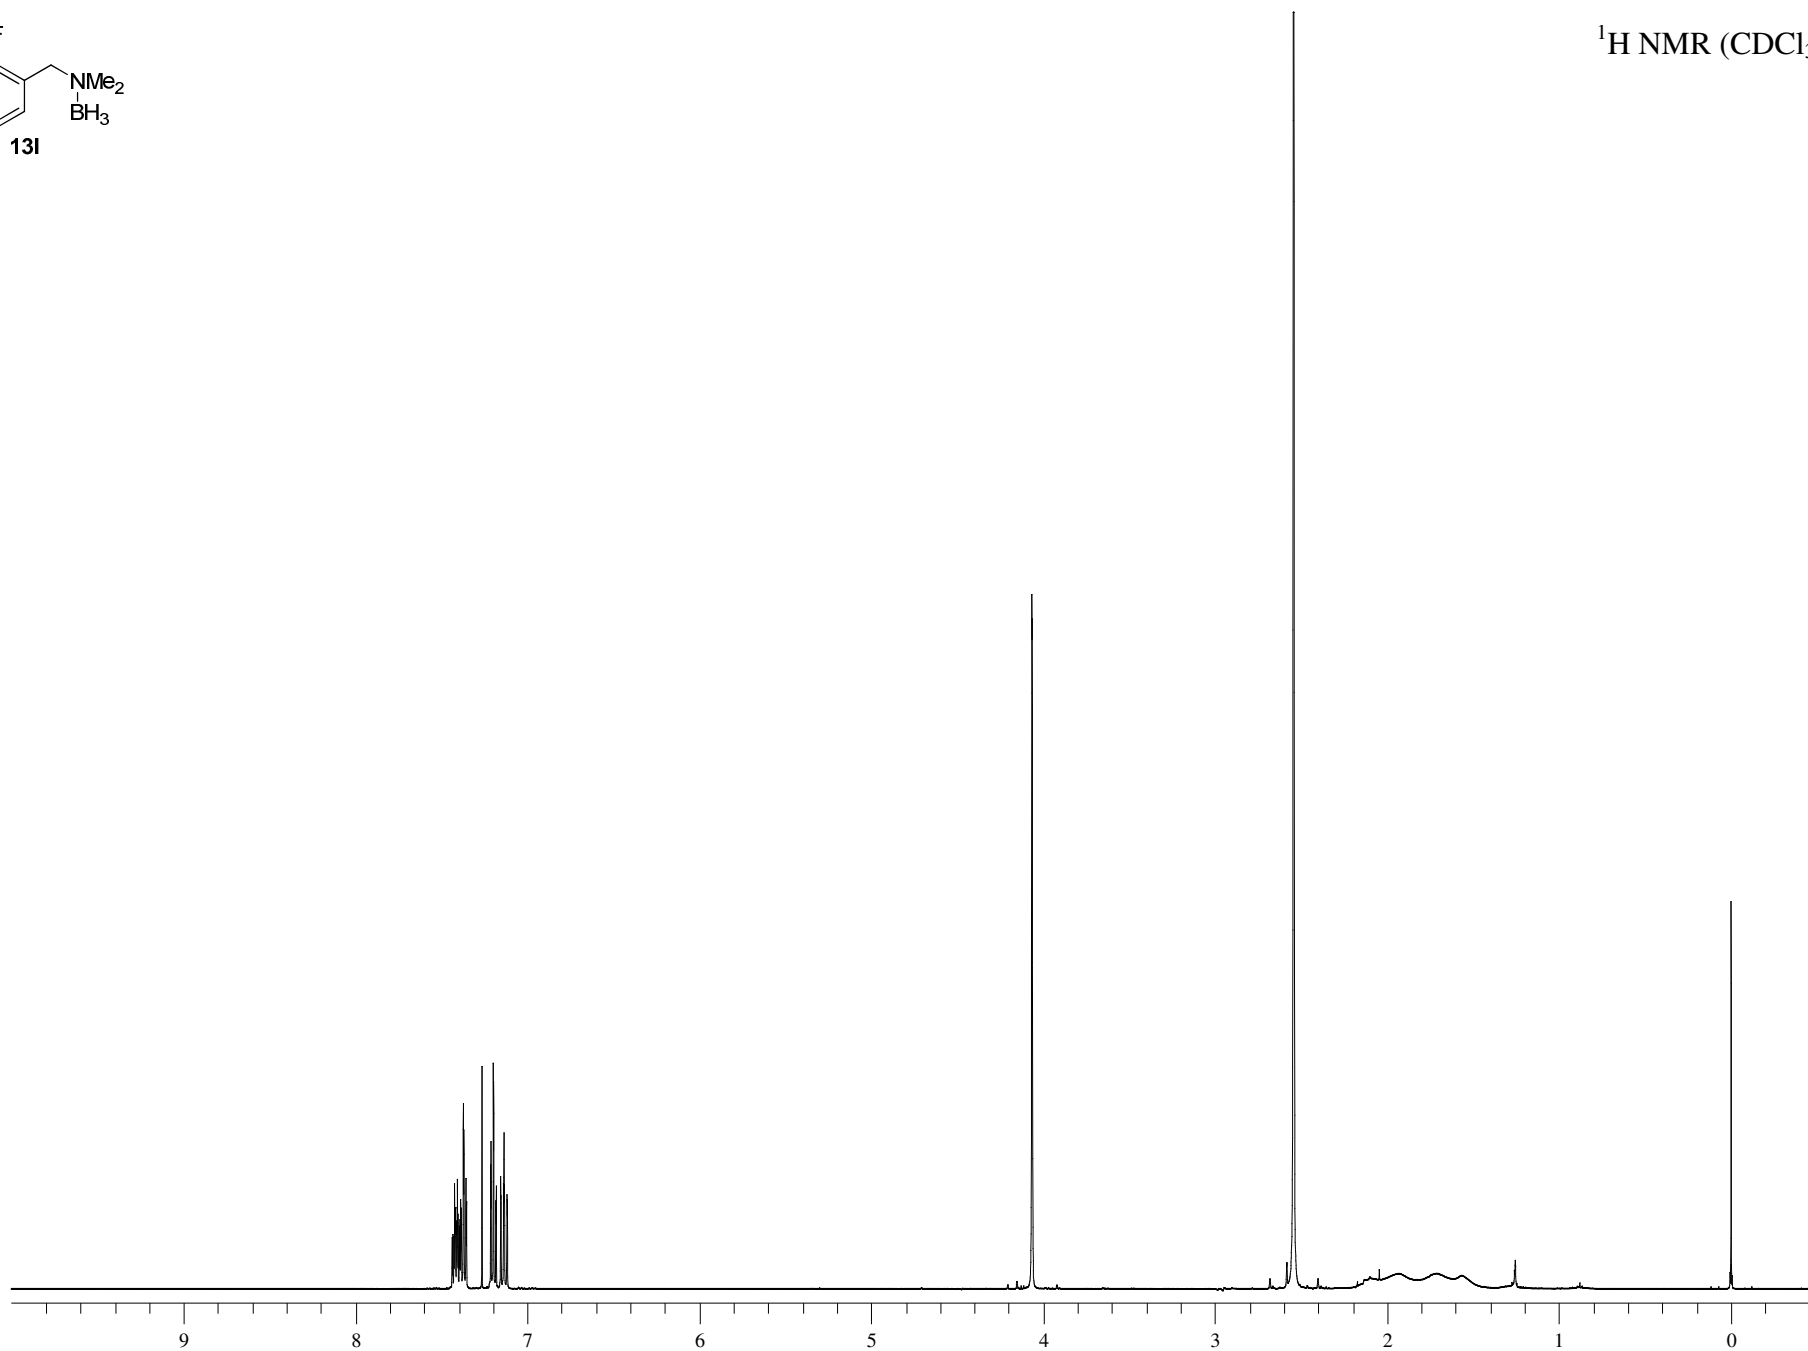

$^1\text{H NMR (C}_6\text{D}_5\text{Br)}$

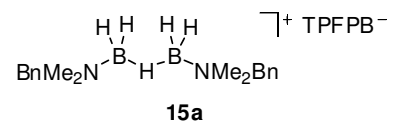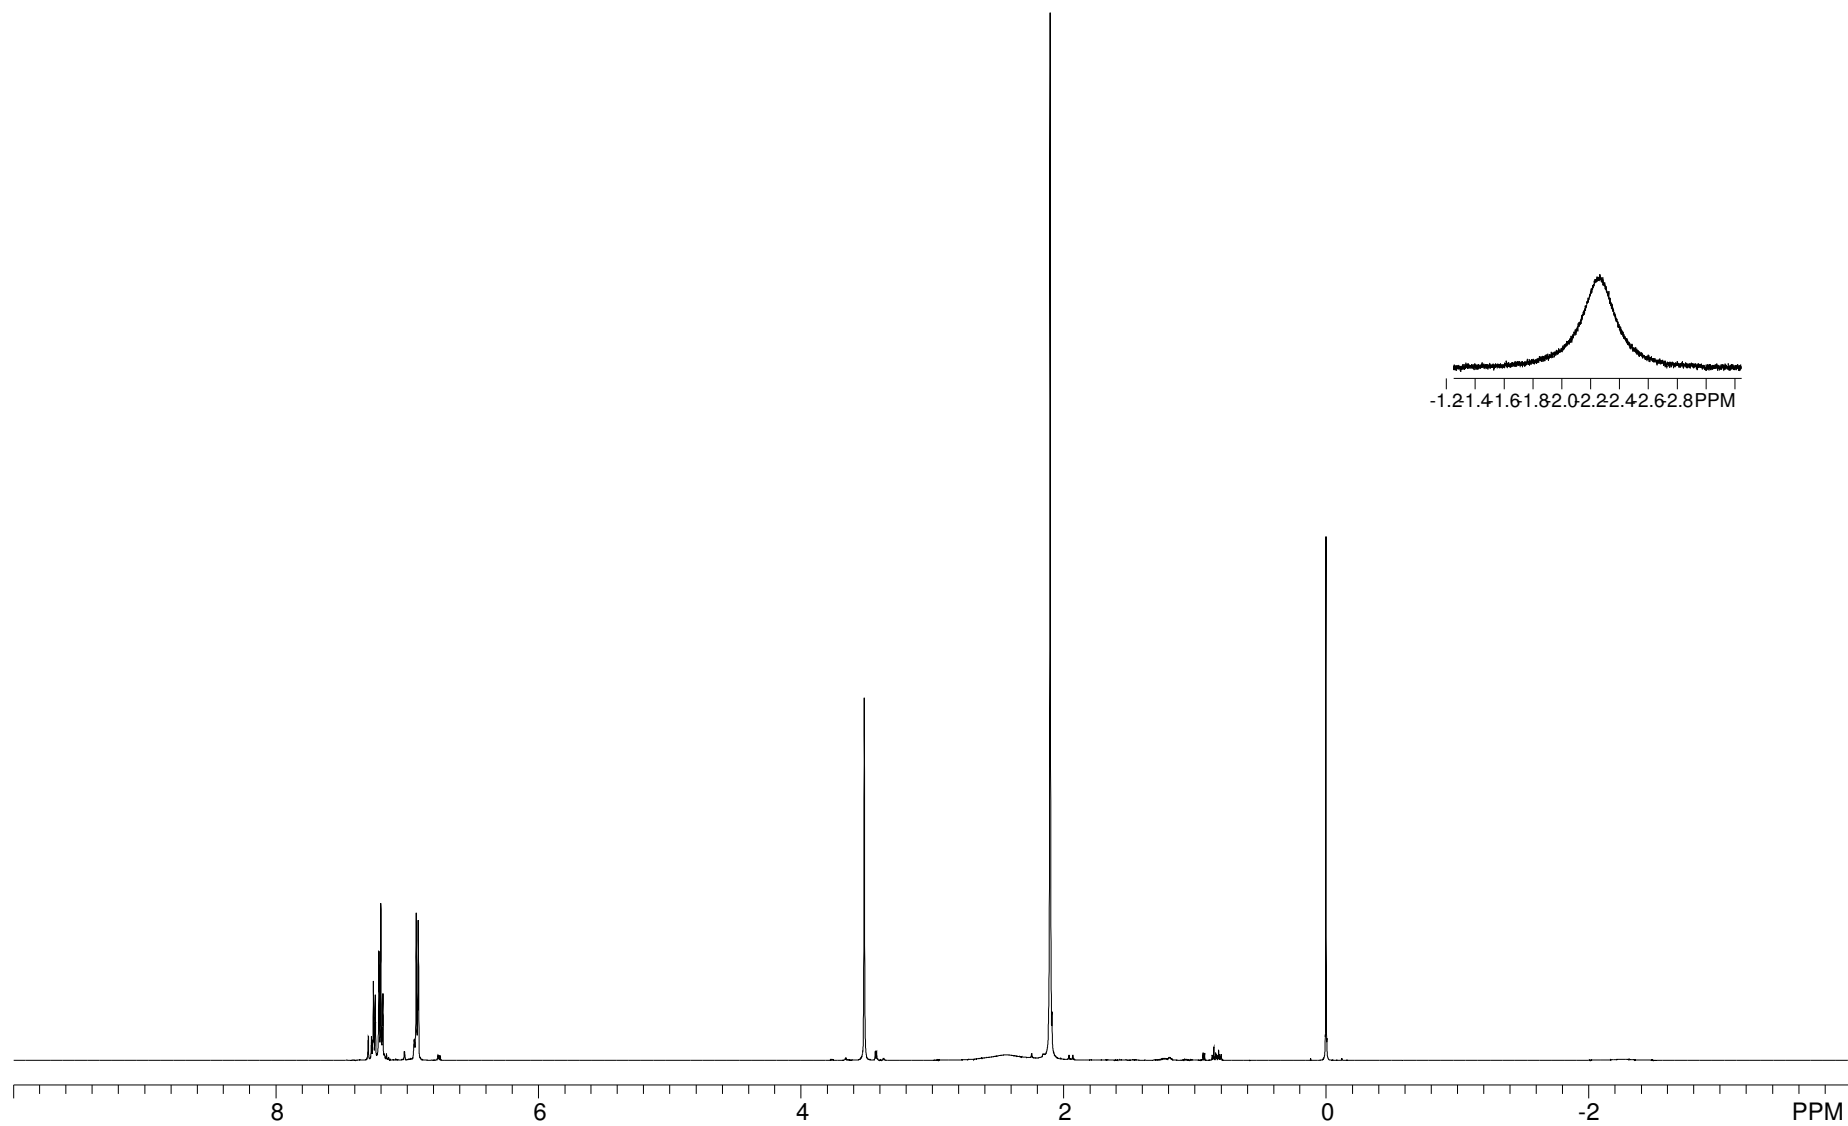

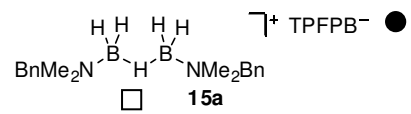

$^{11}\text{B}$  NMR ( $\text{C}_6\text{D}_5\text{Br}$ )

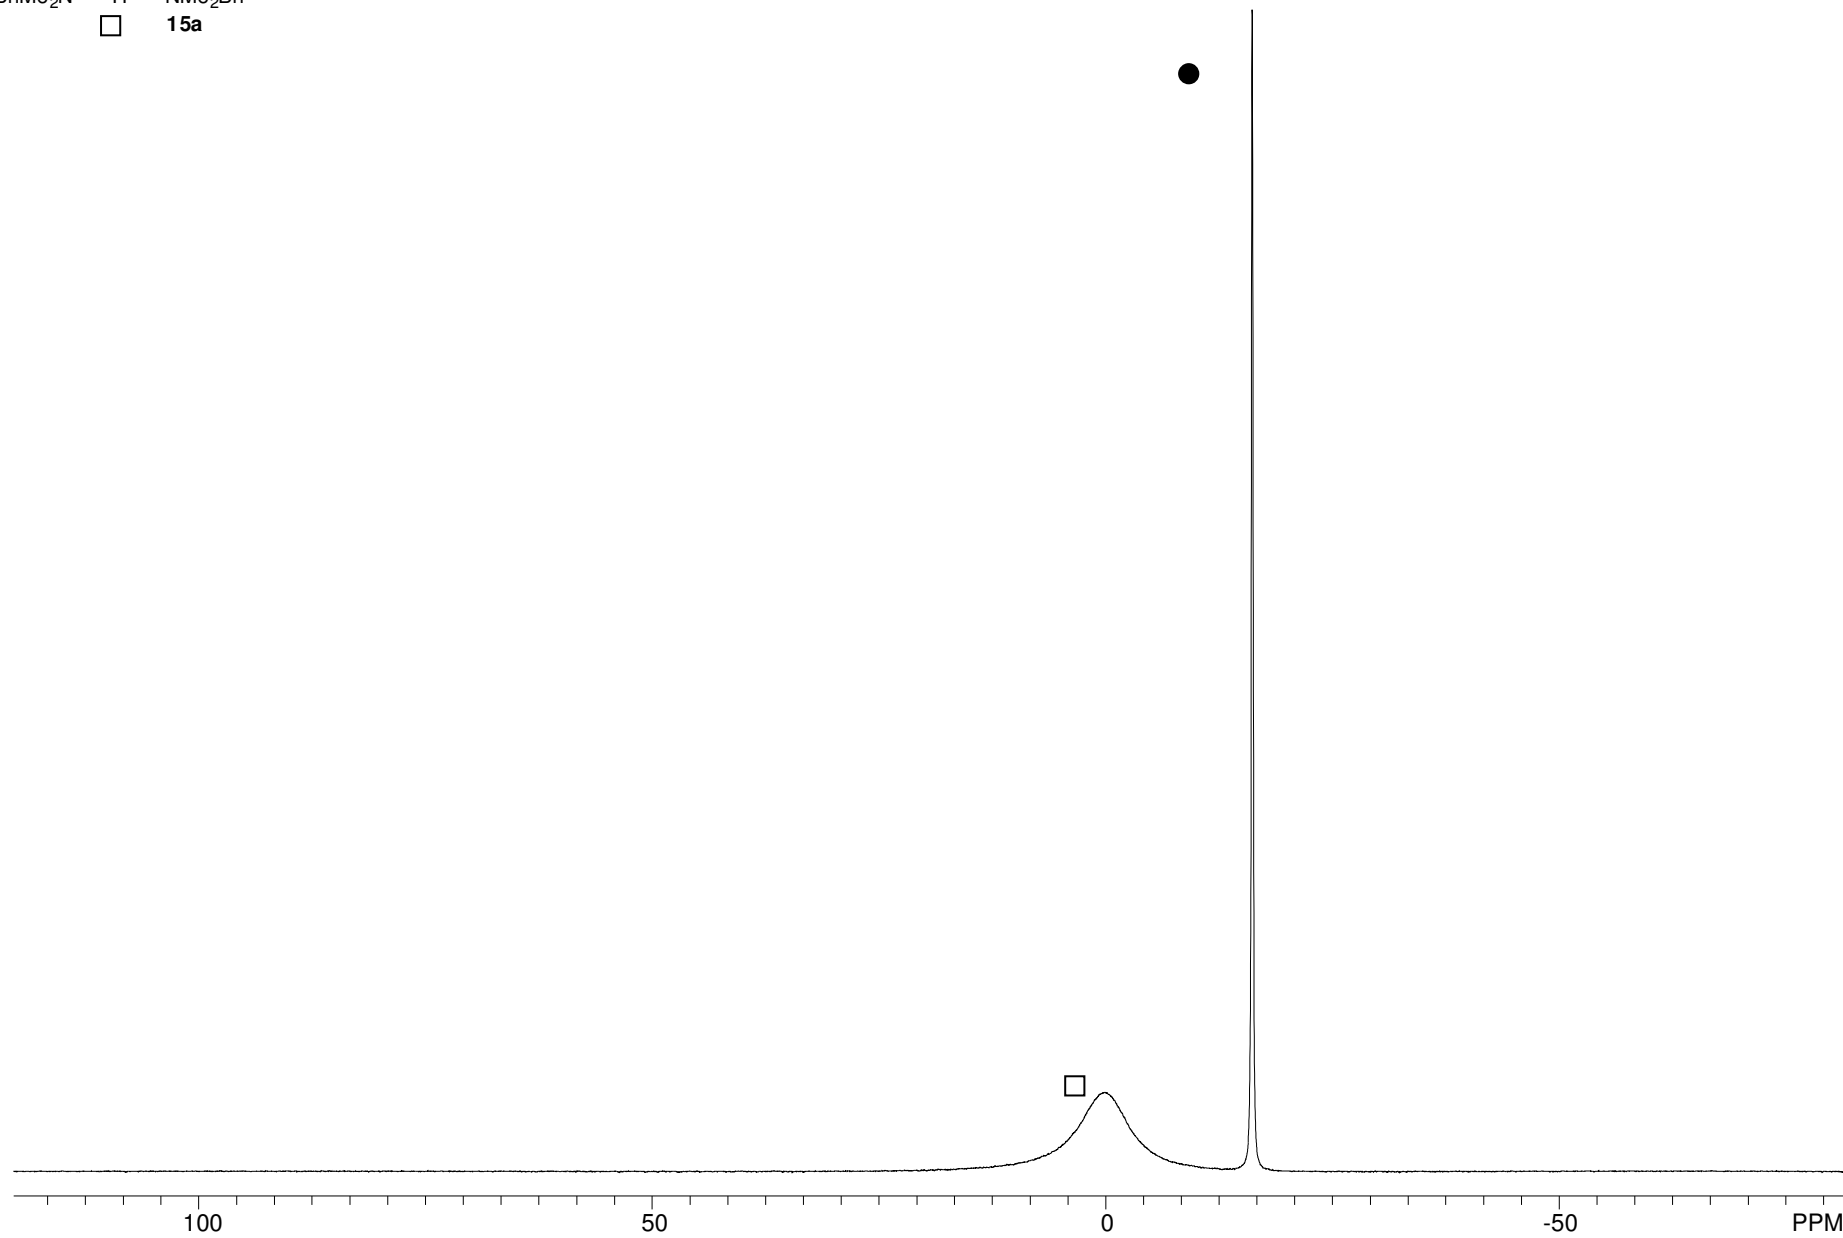

$^1\text{H}$  NMR ( $\text{C}_6\text{D}_5\text{Br}$ )

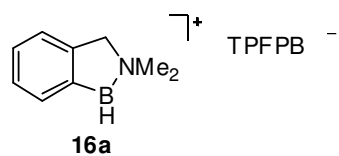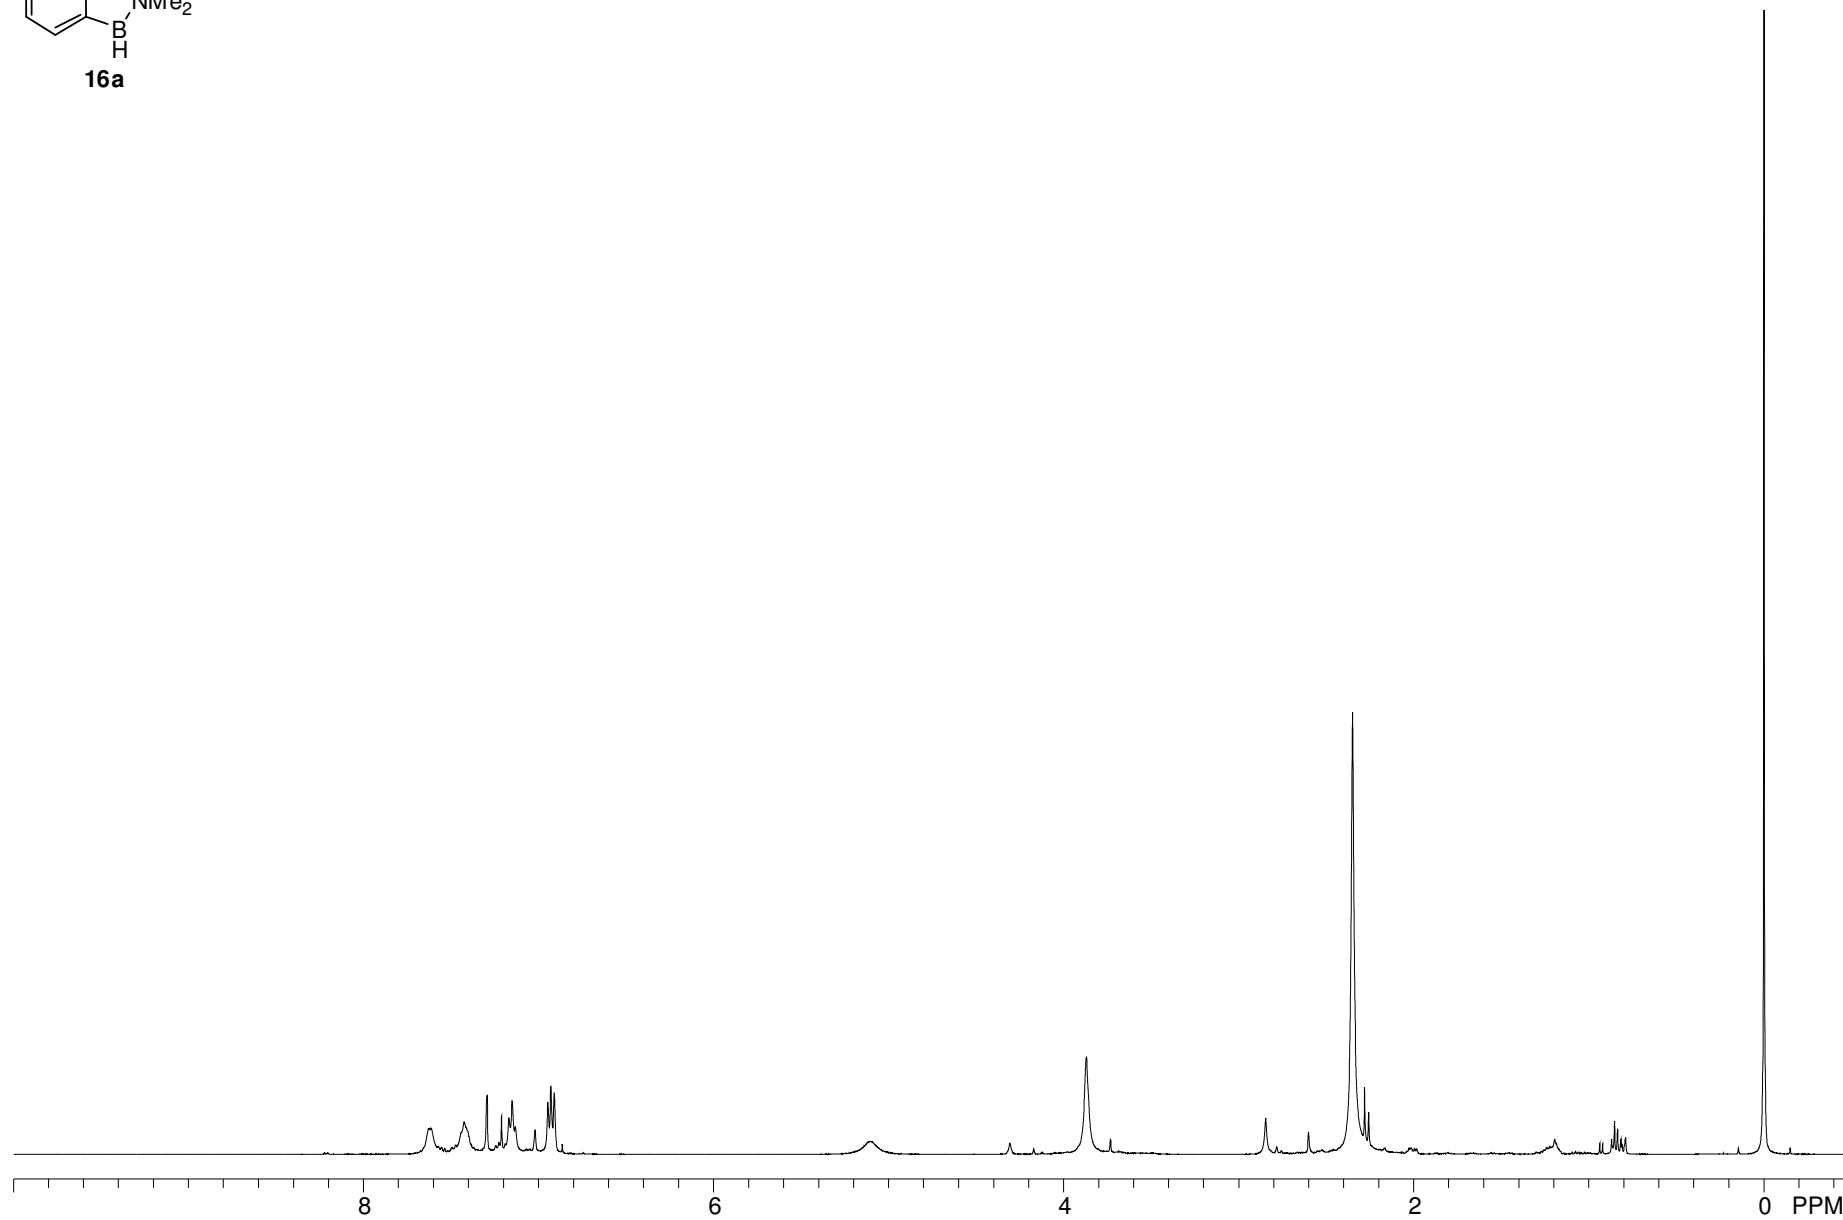

$^{11}\text{B}$  NMR ( $\text{C}_6\text{D}_5\text{Br}$ )

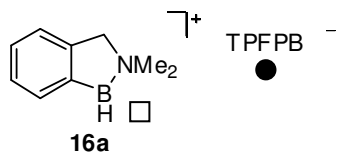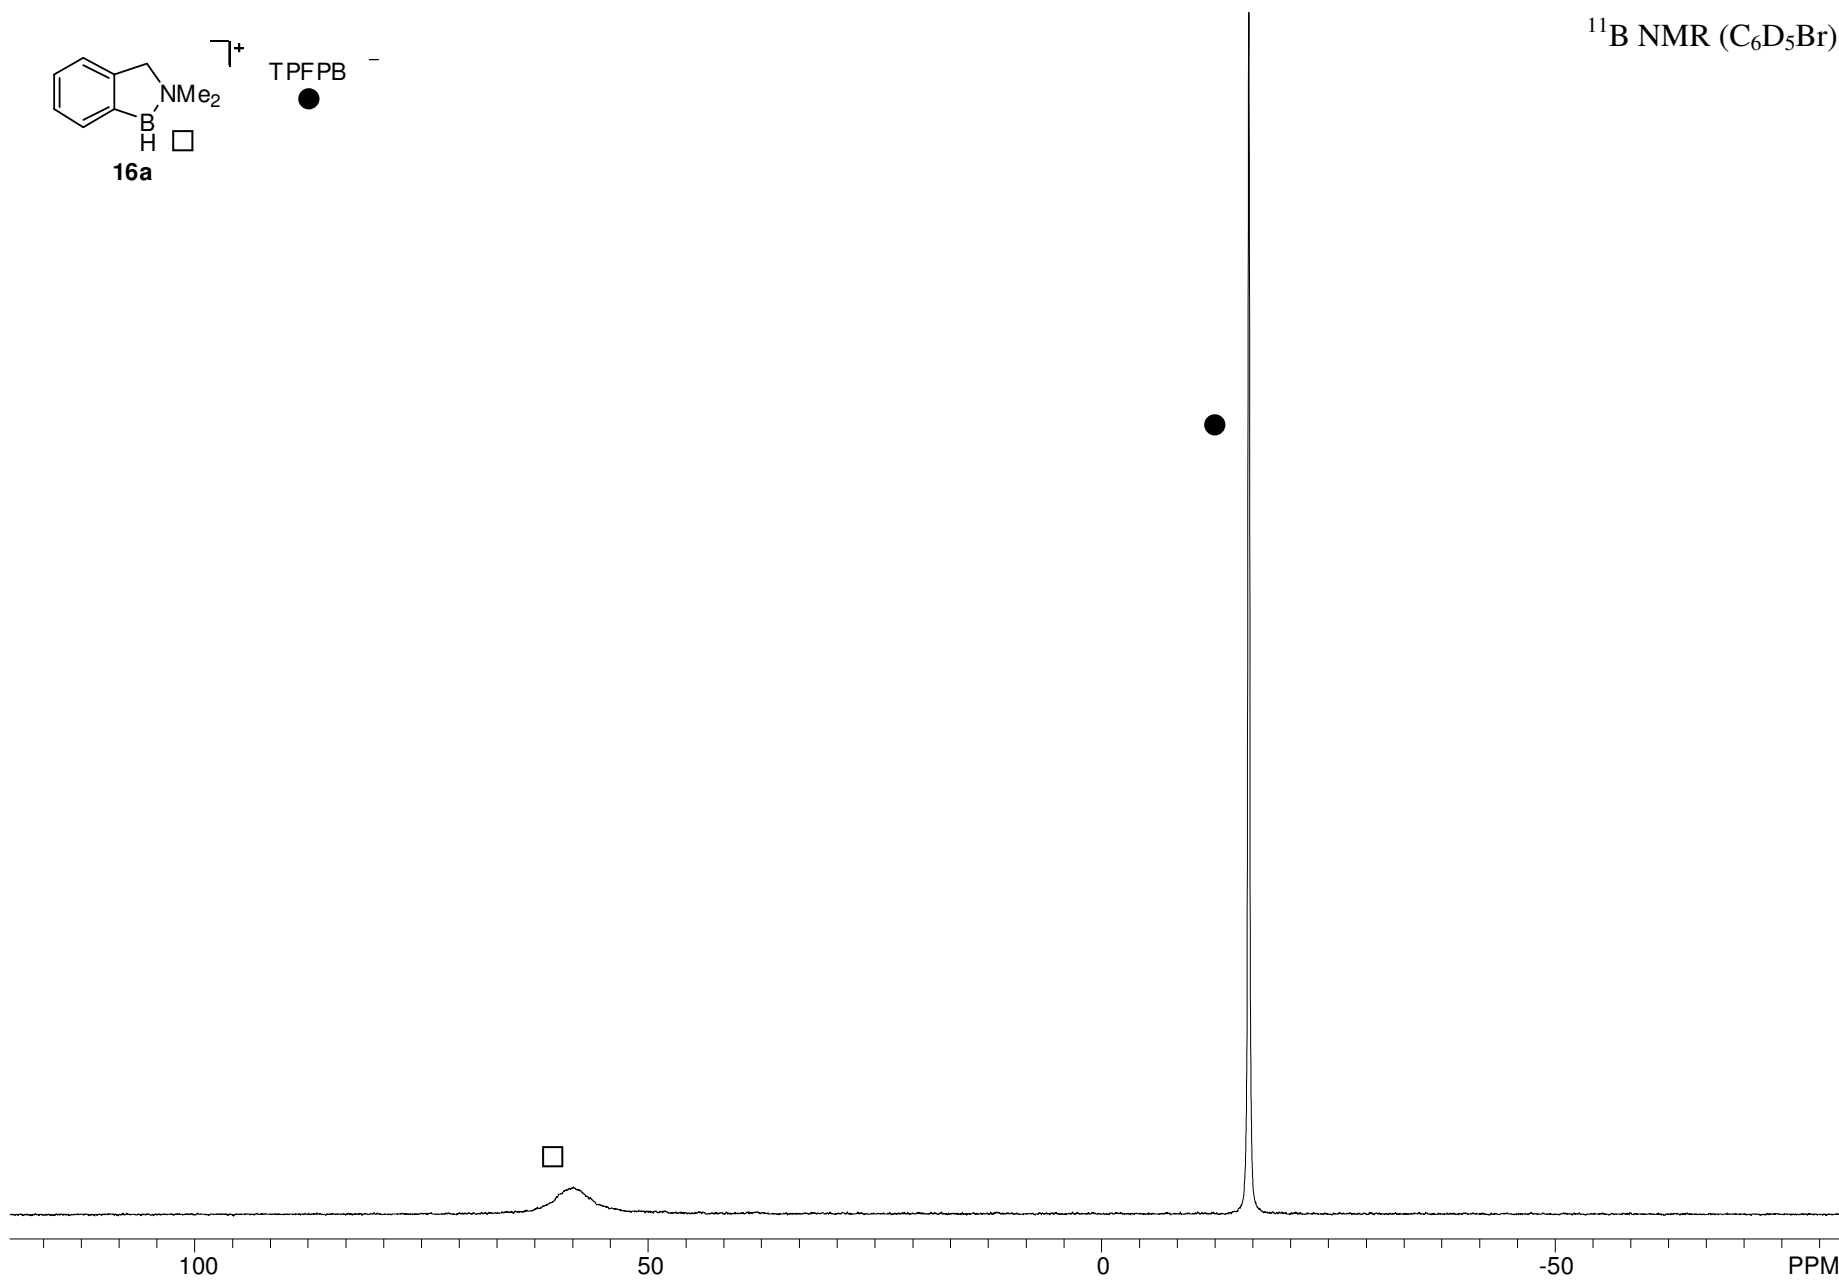



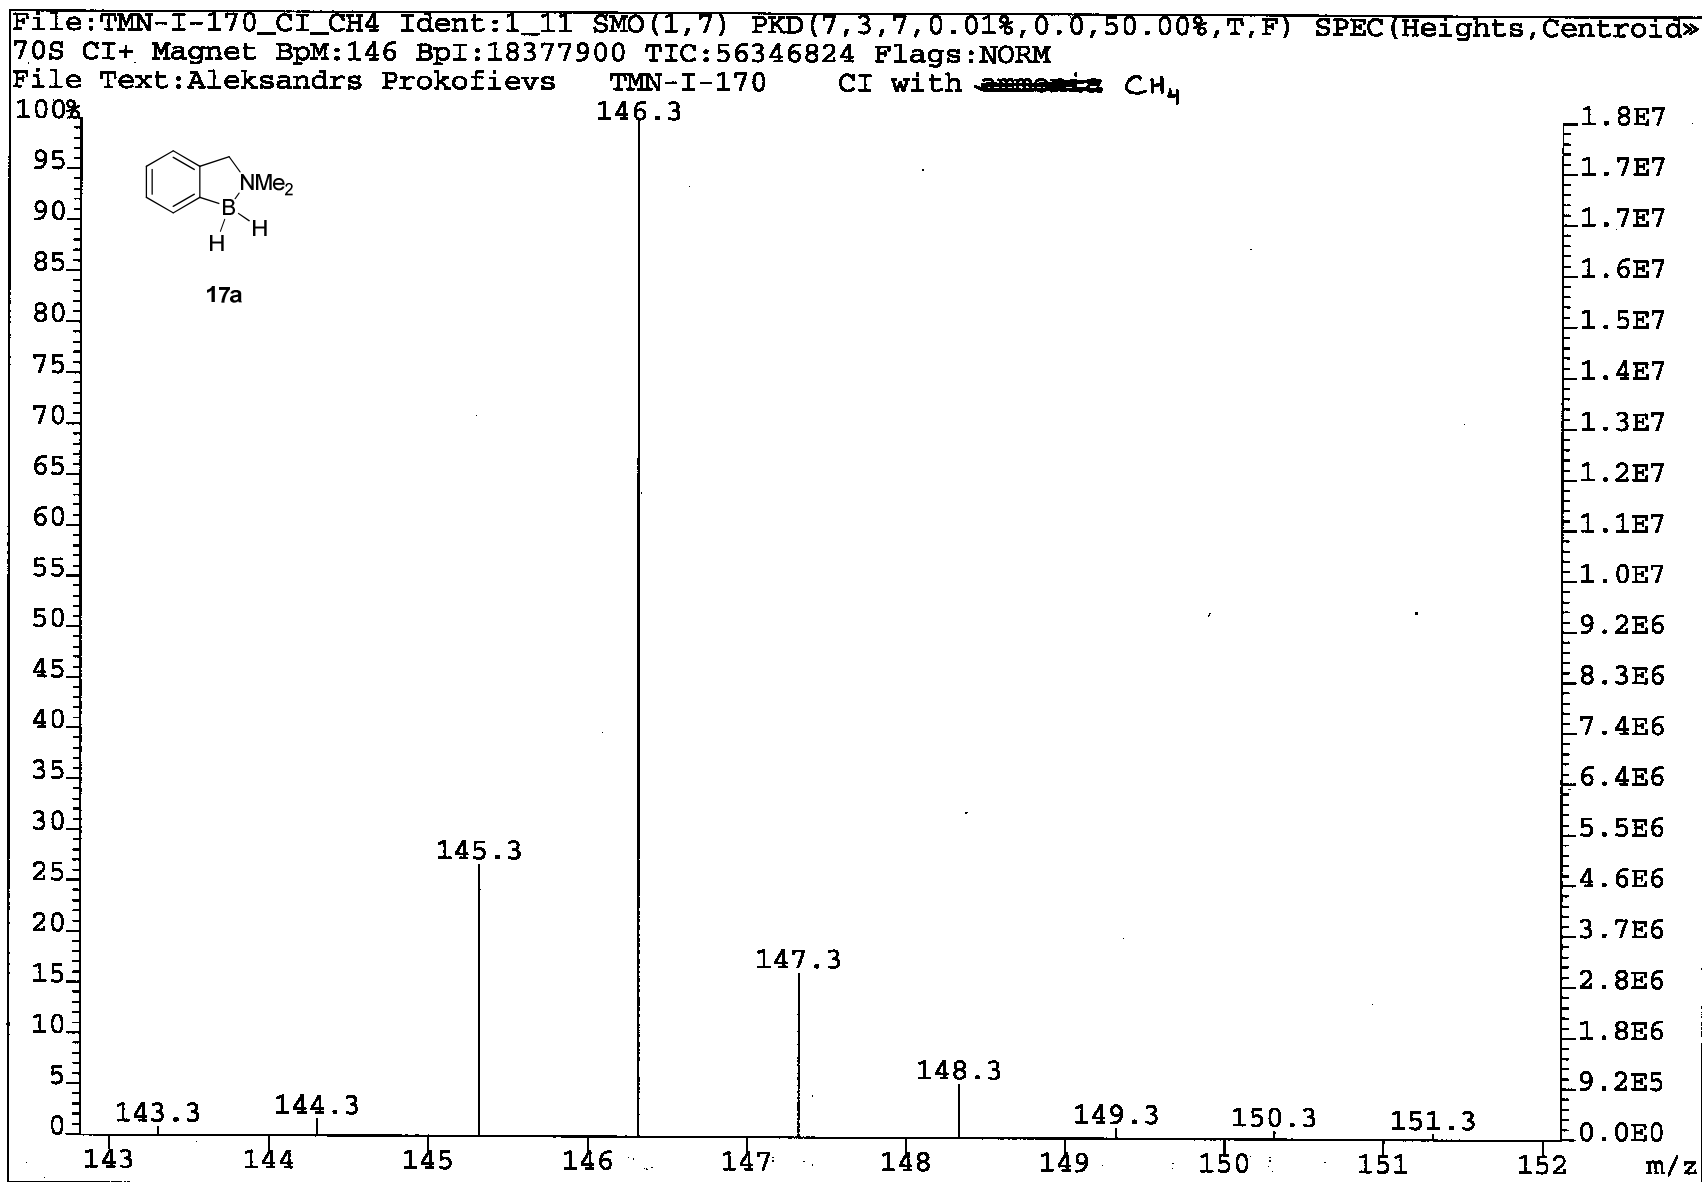

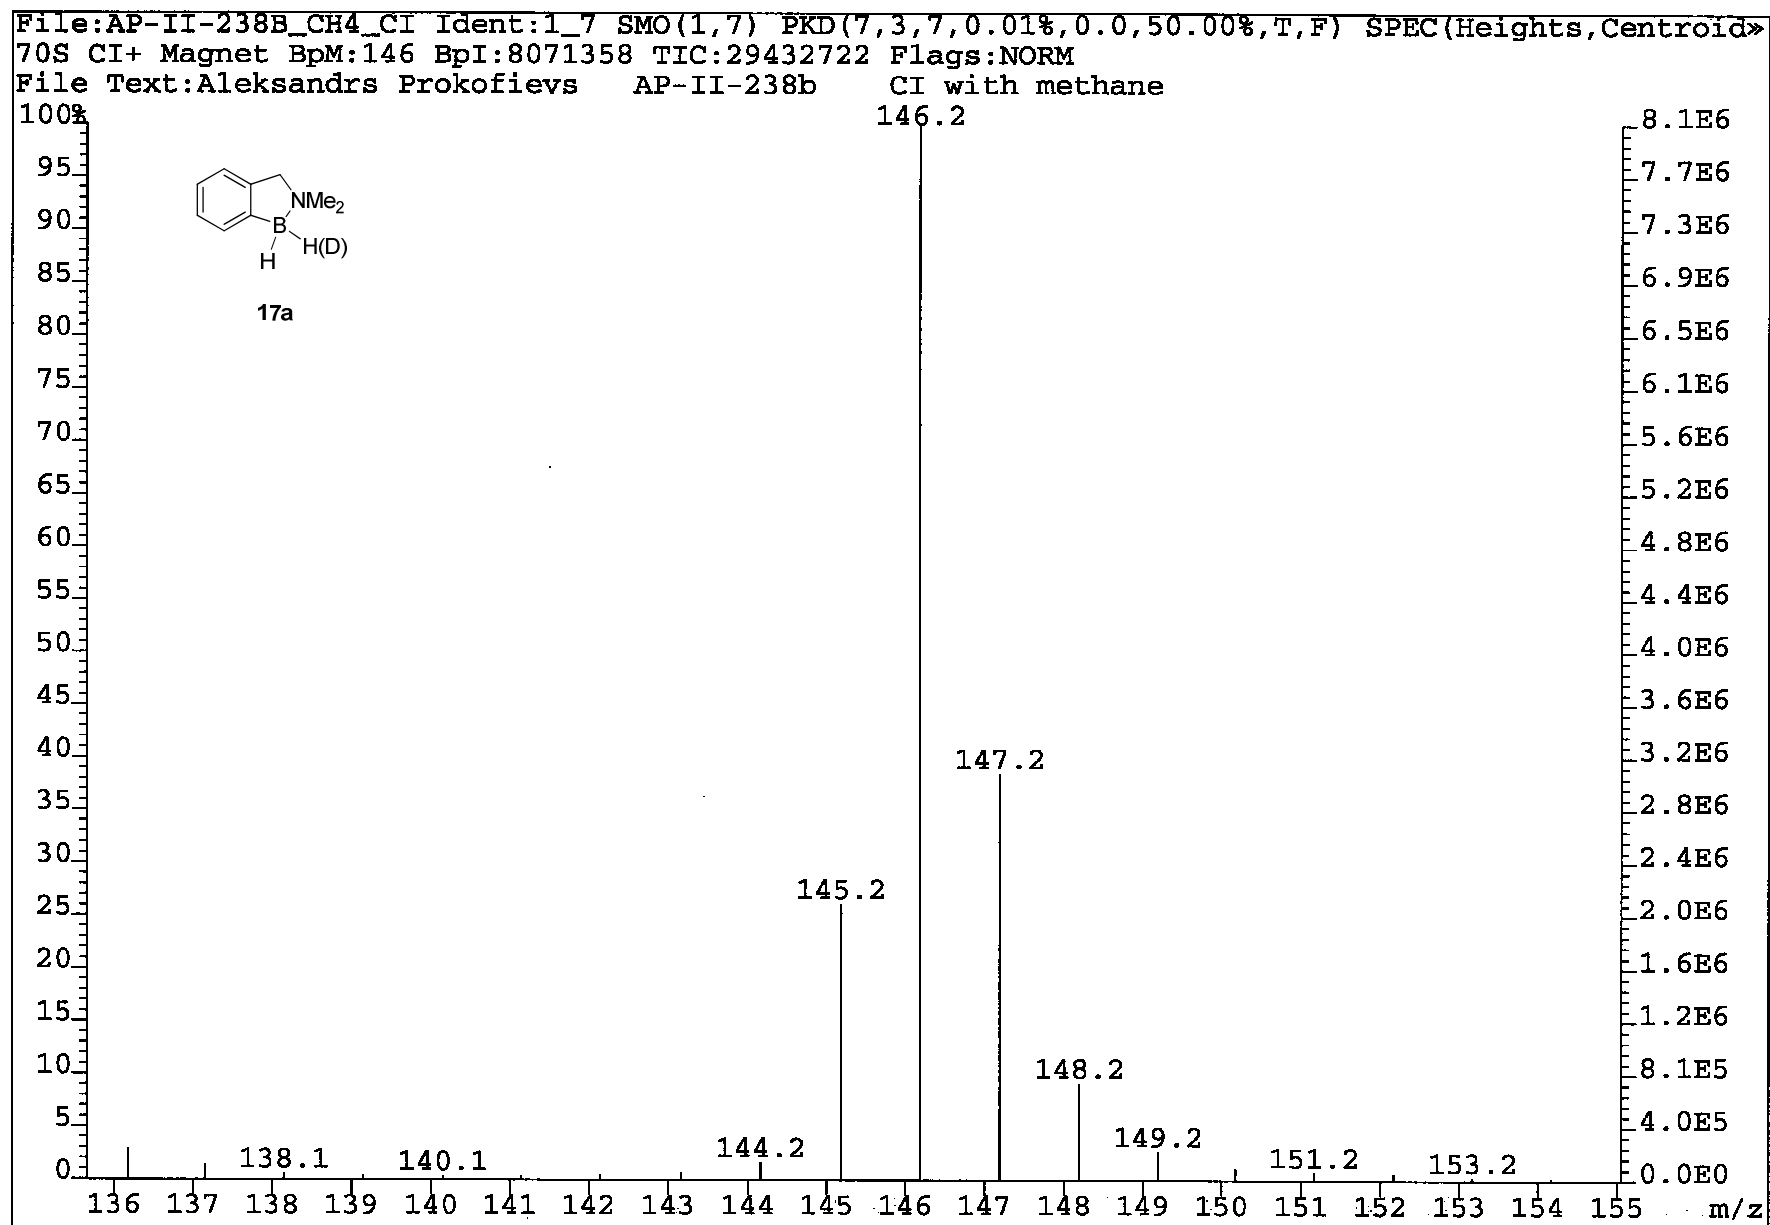

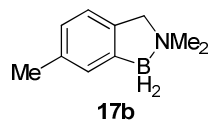

$^1\text{H NMR (CDCl}_3)$

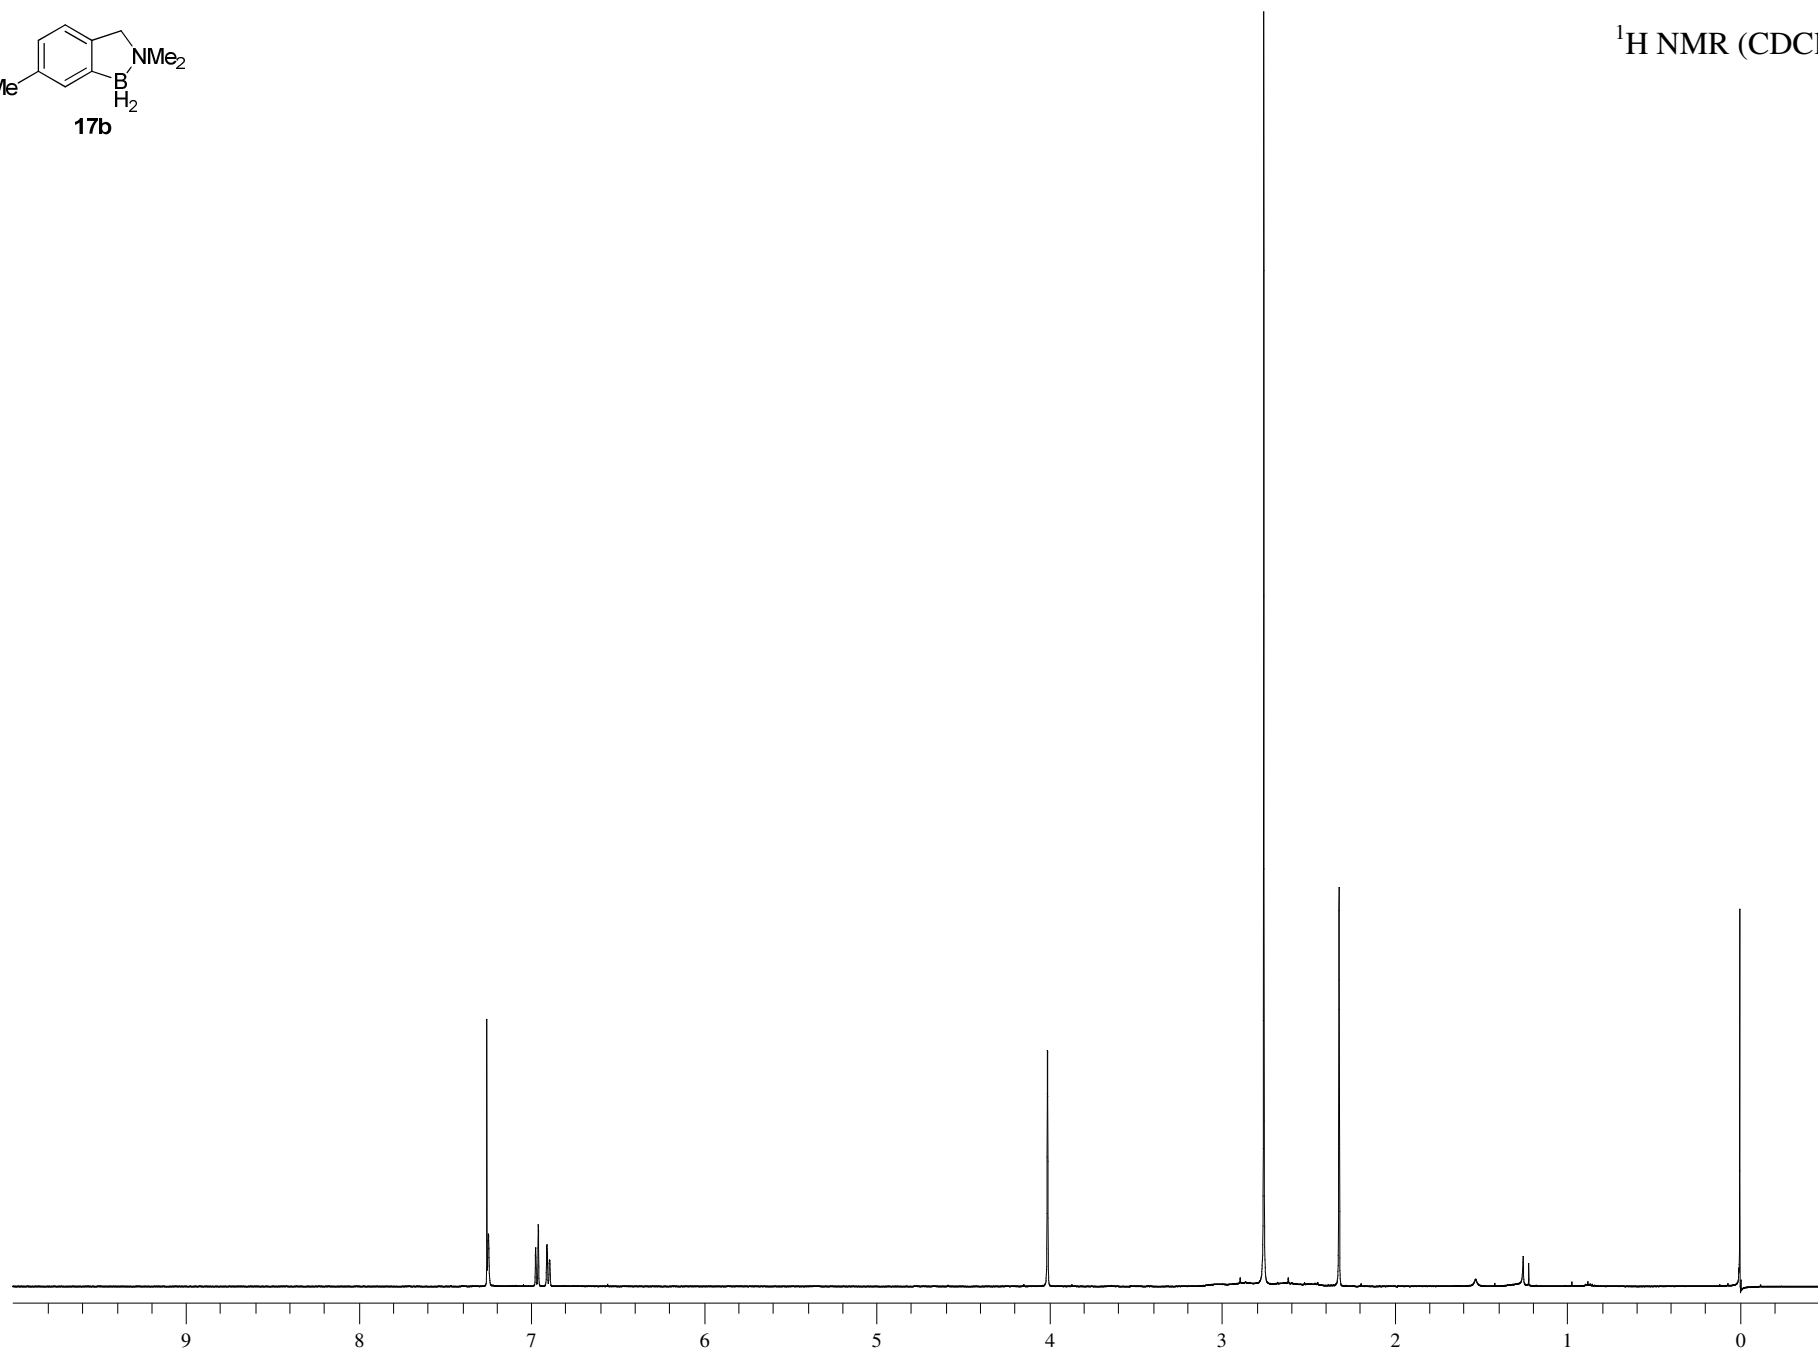

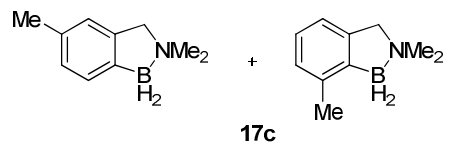

<sup>1</sup>H NMR (CDCl<sub>3</sub>)

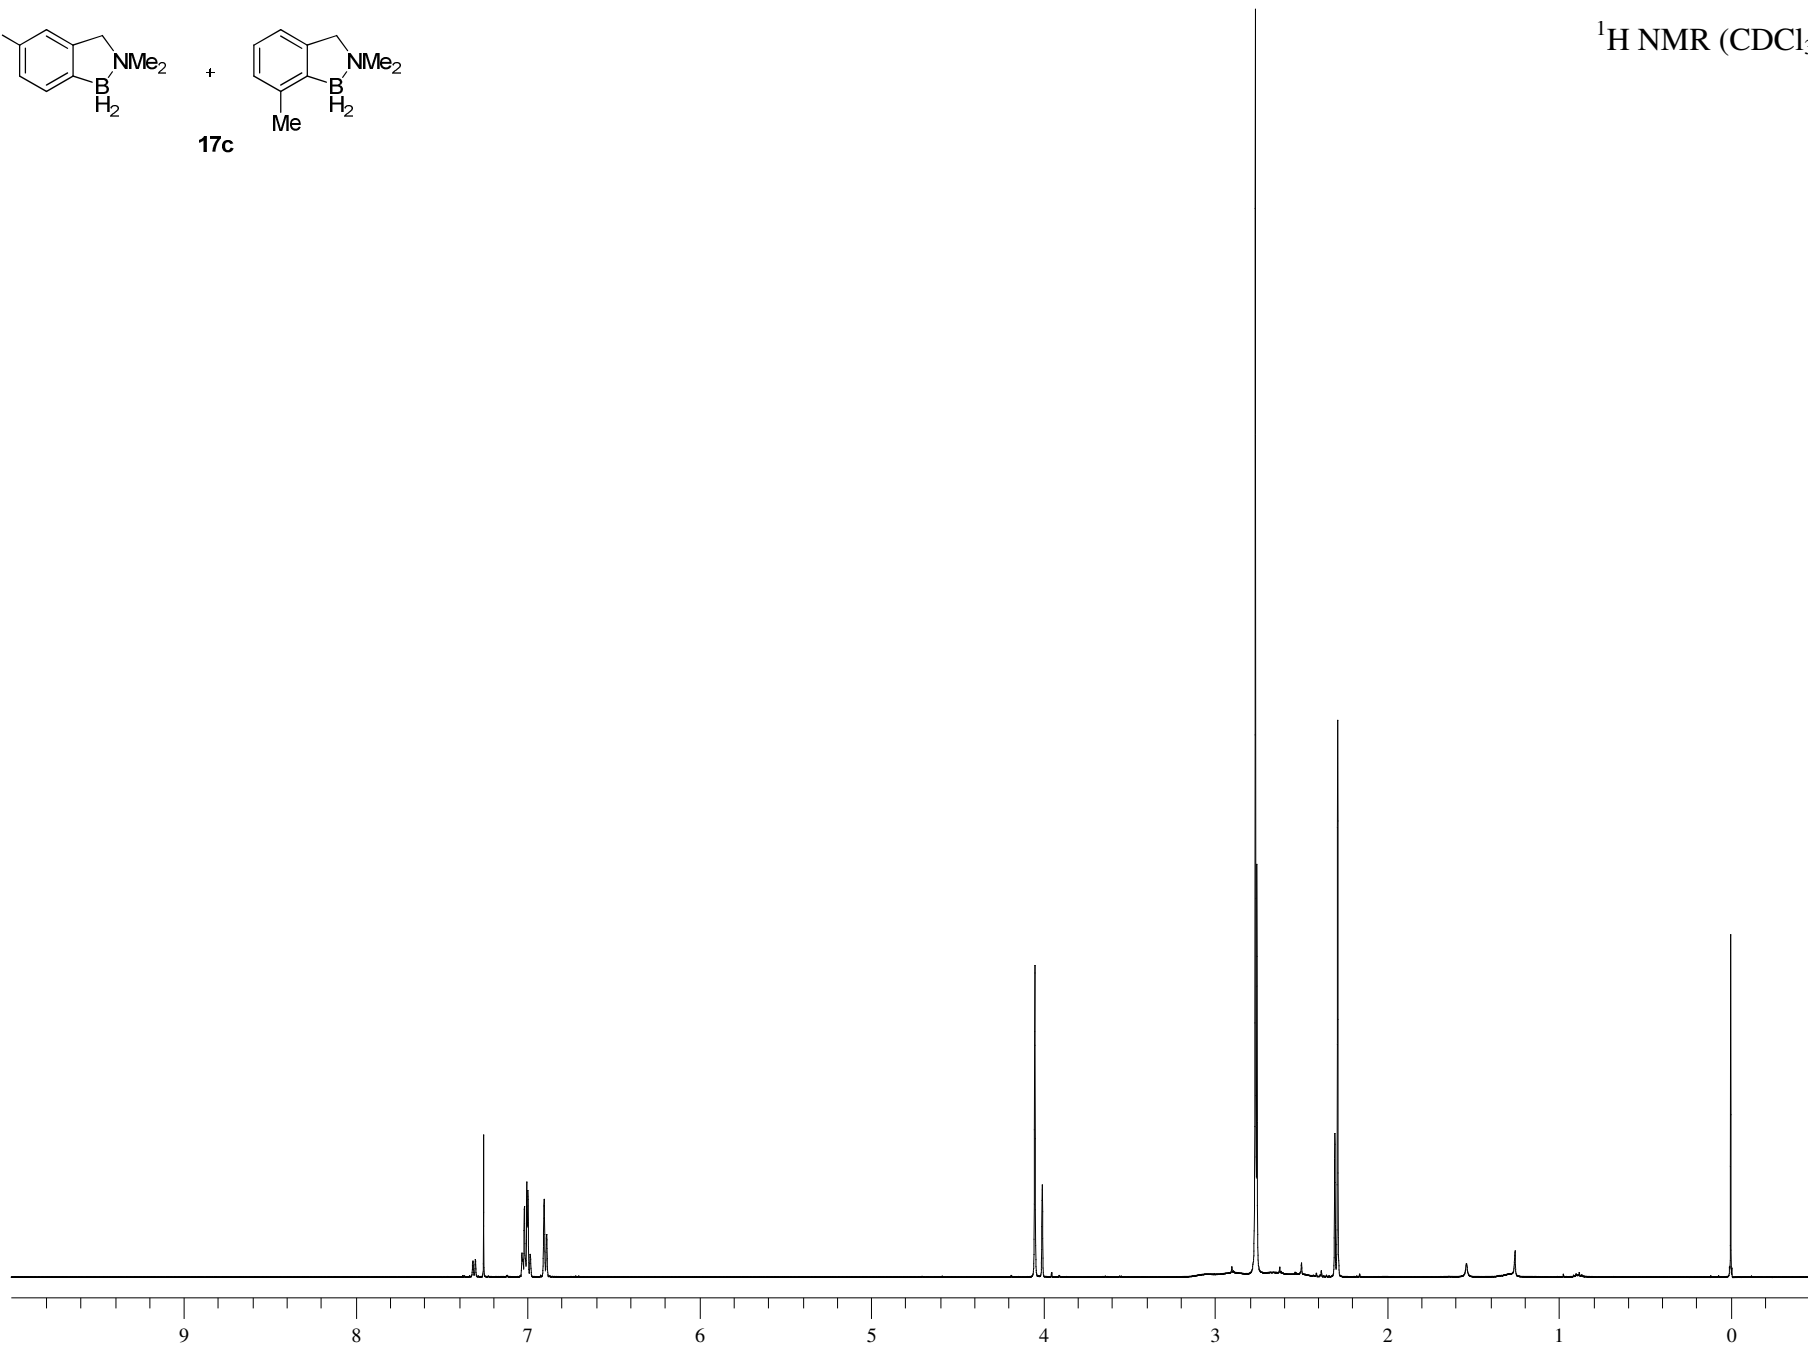

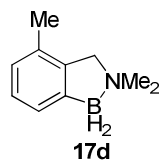

$^1\text{H NMR (CDCl}_3)$

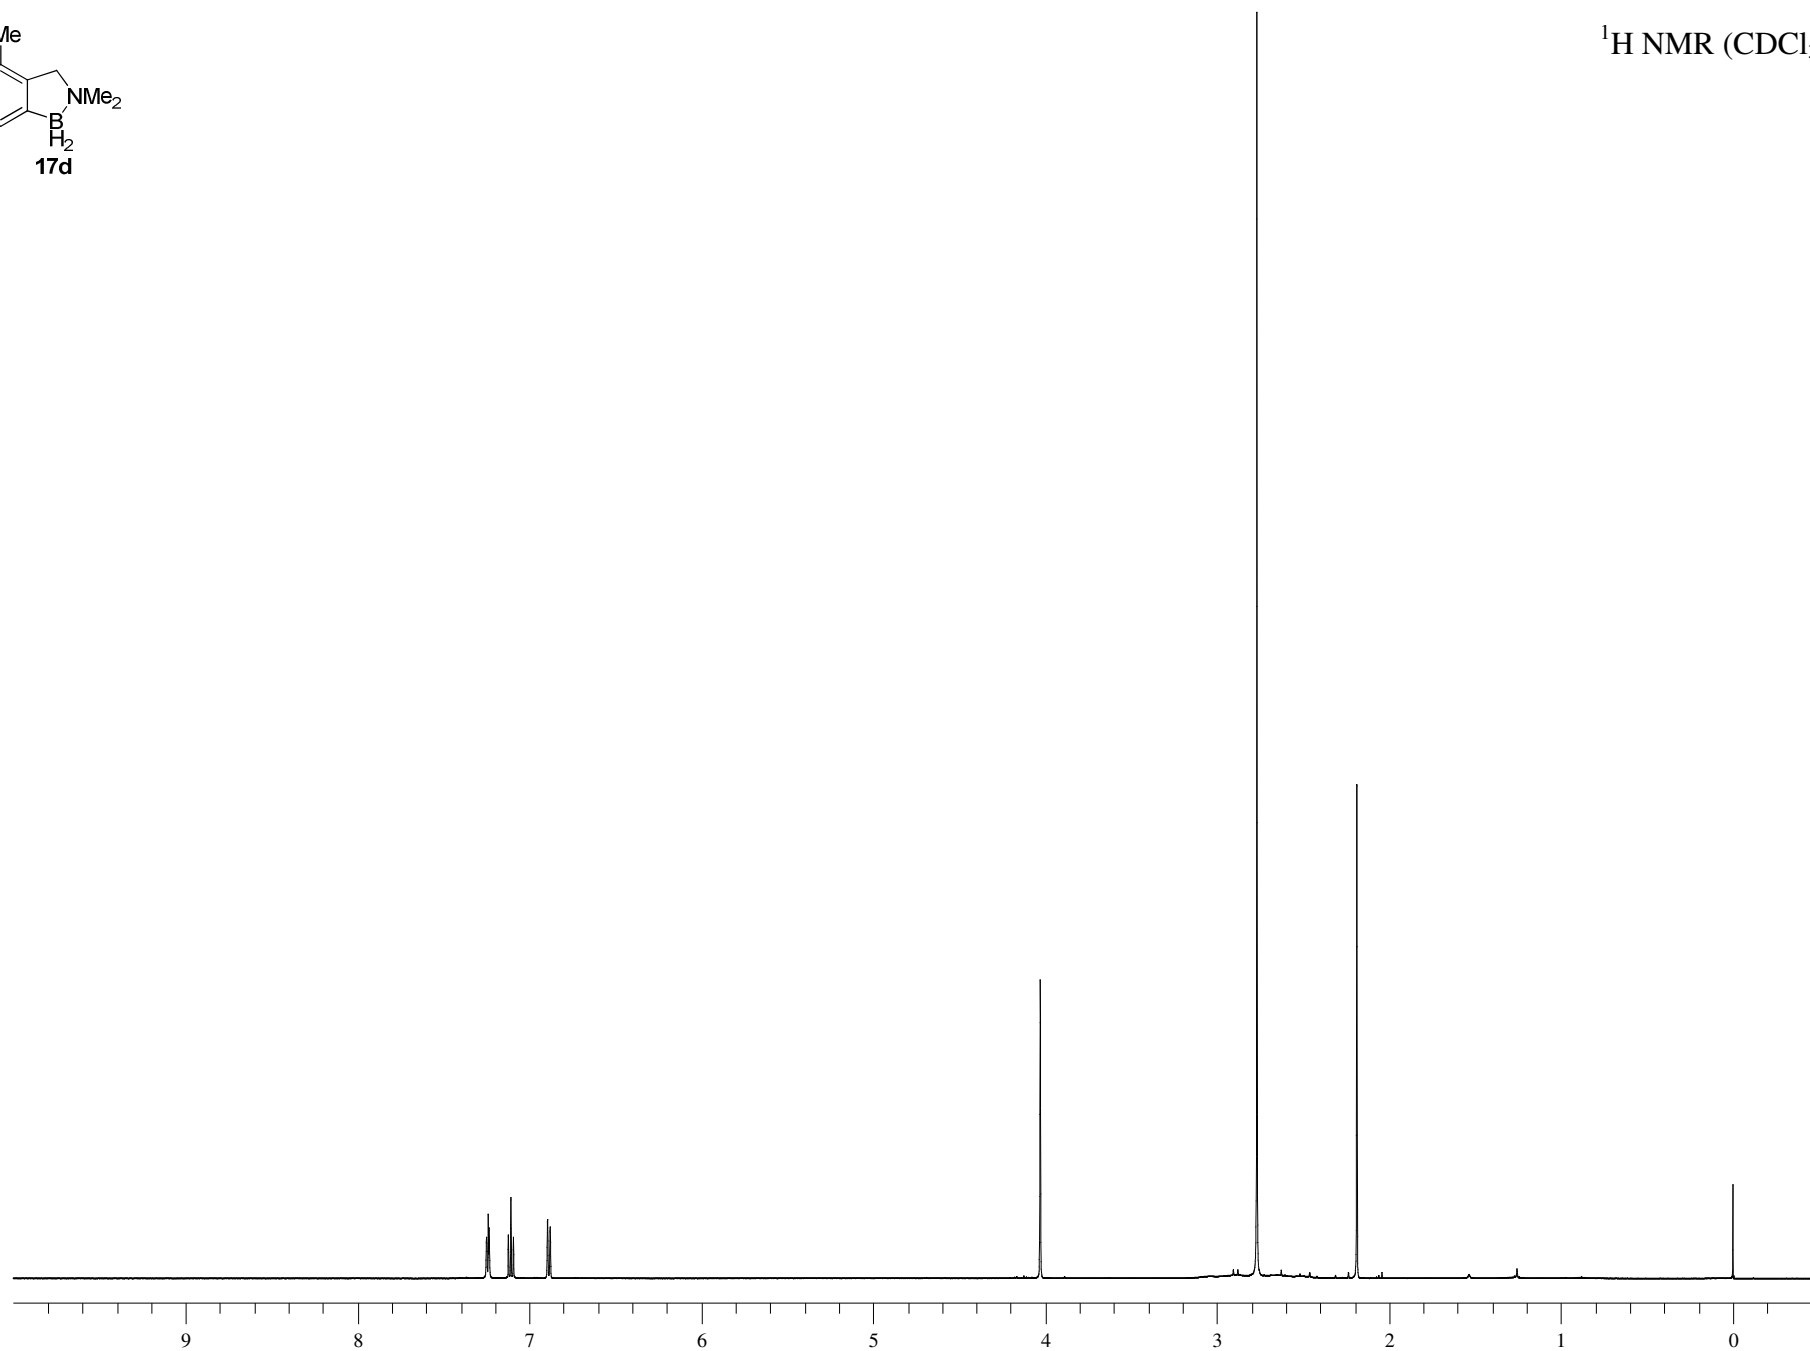

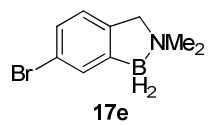

<sup>1</sup>H NMR (CDCl<sub>3</sub>)

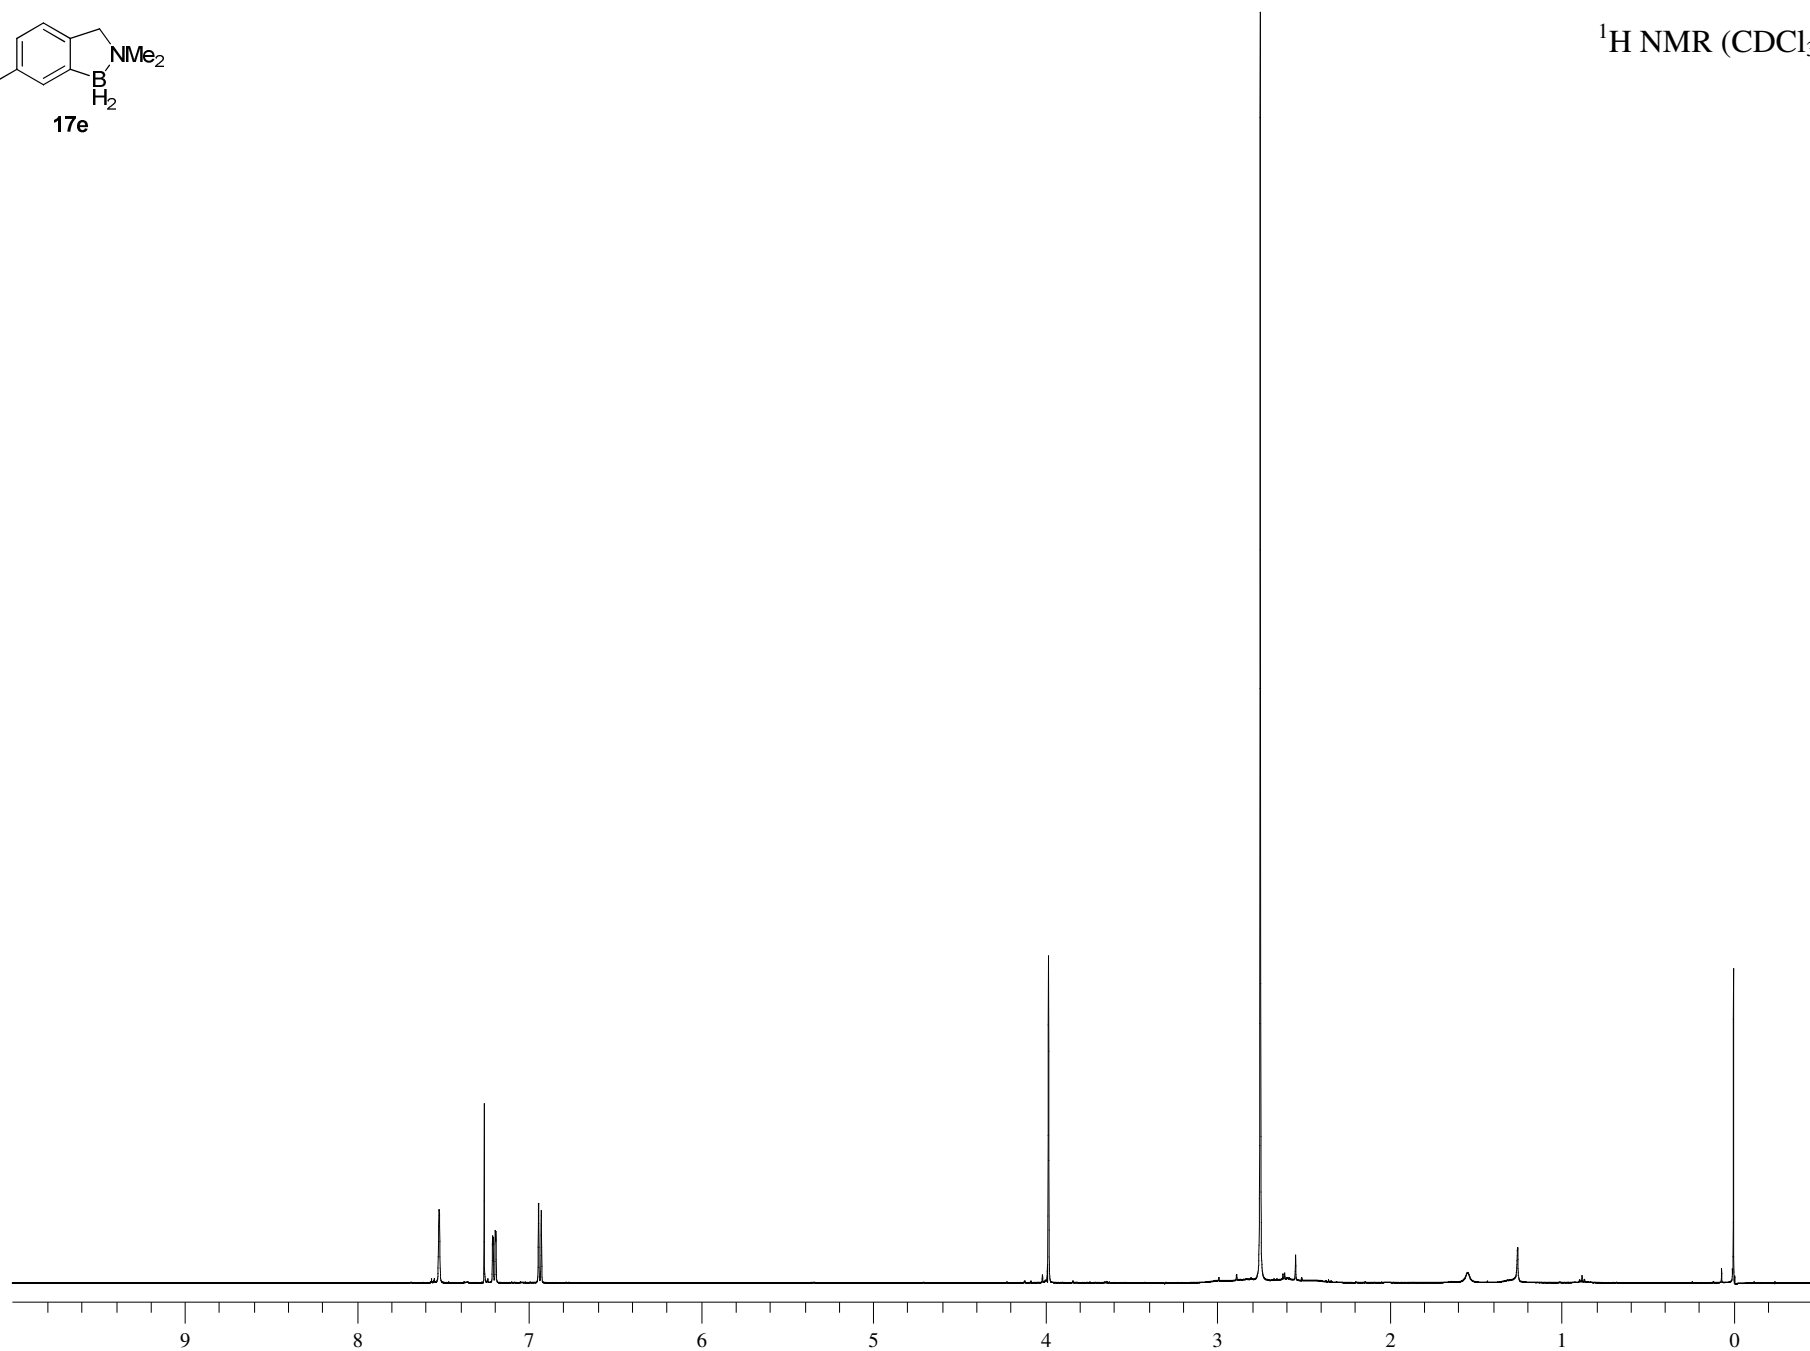

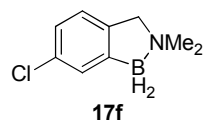

<sup>1</sup>H NMR (CDCl<sub>3</sub>)

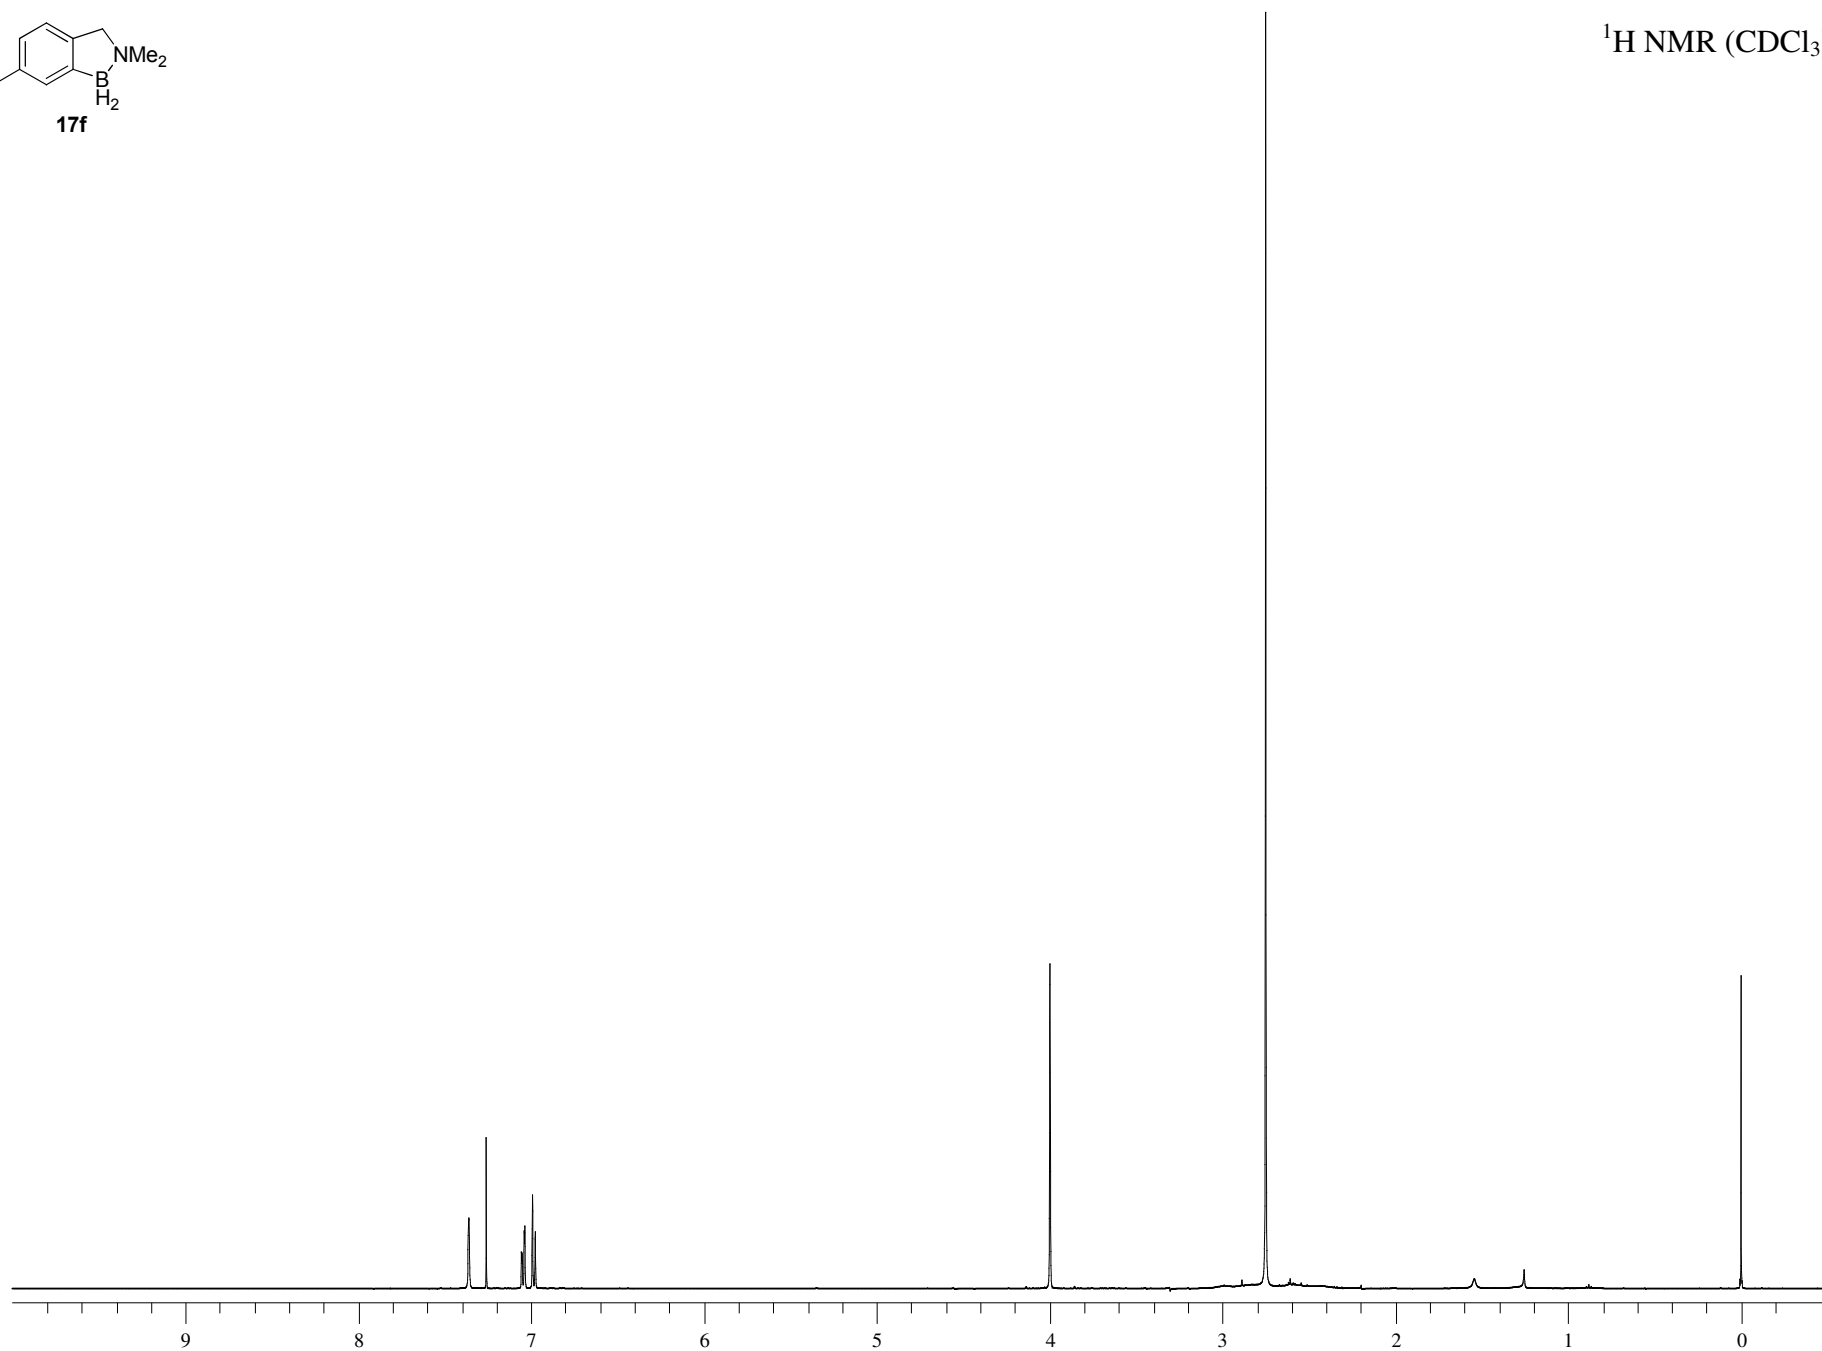

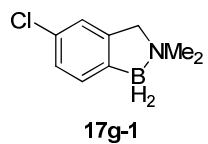

<sup>1</sup>H NMR (CDCl<sub>3</sub>)

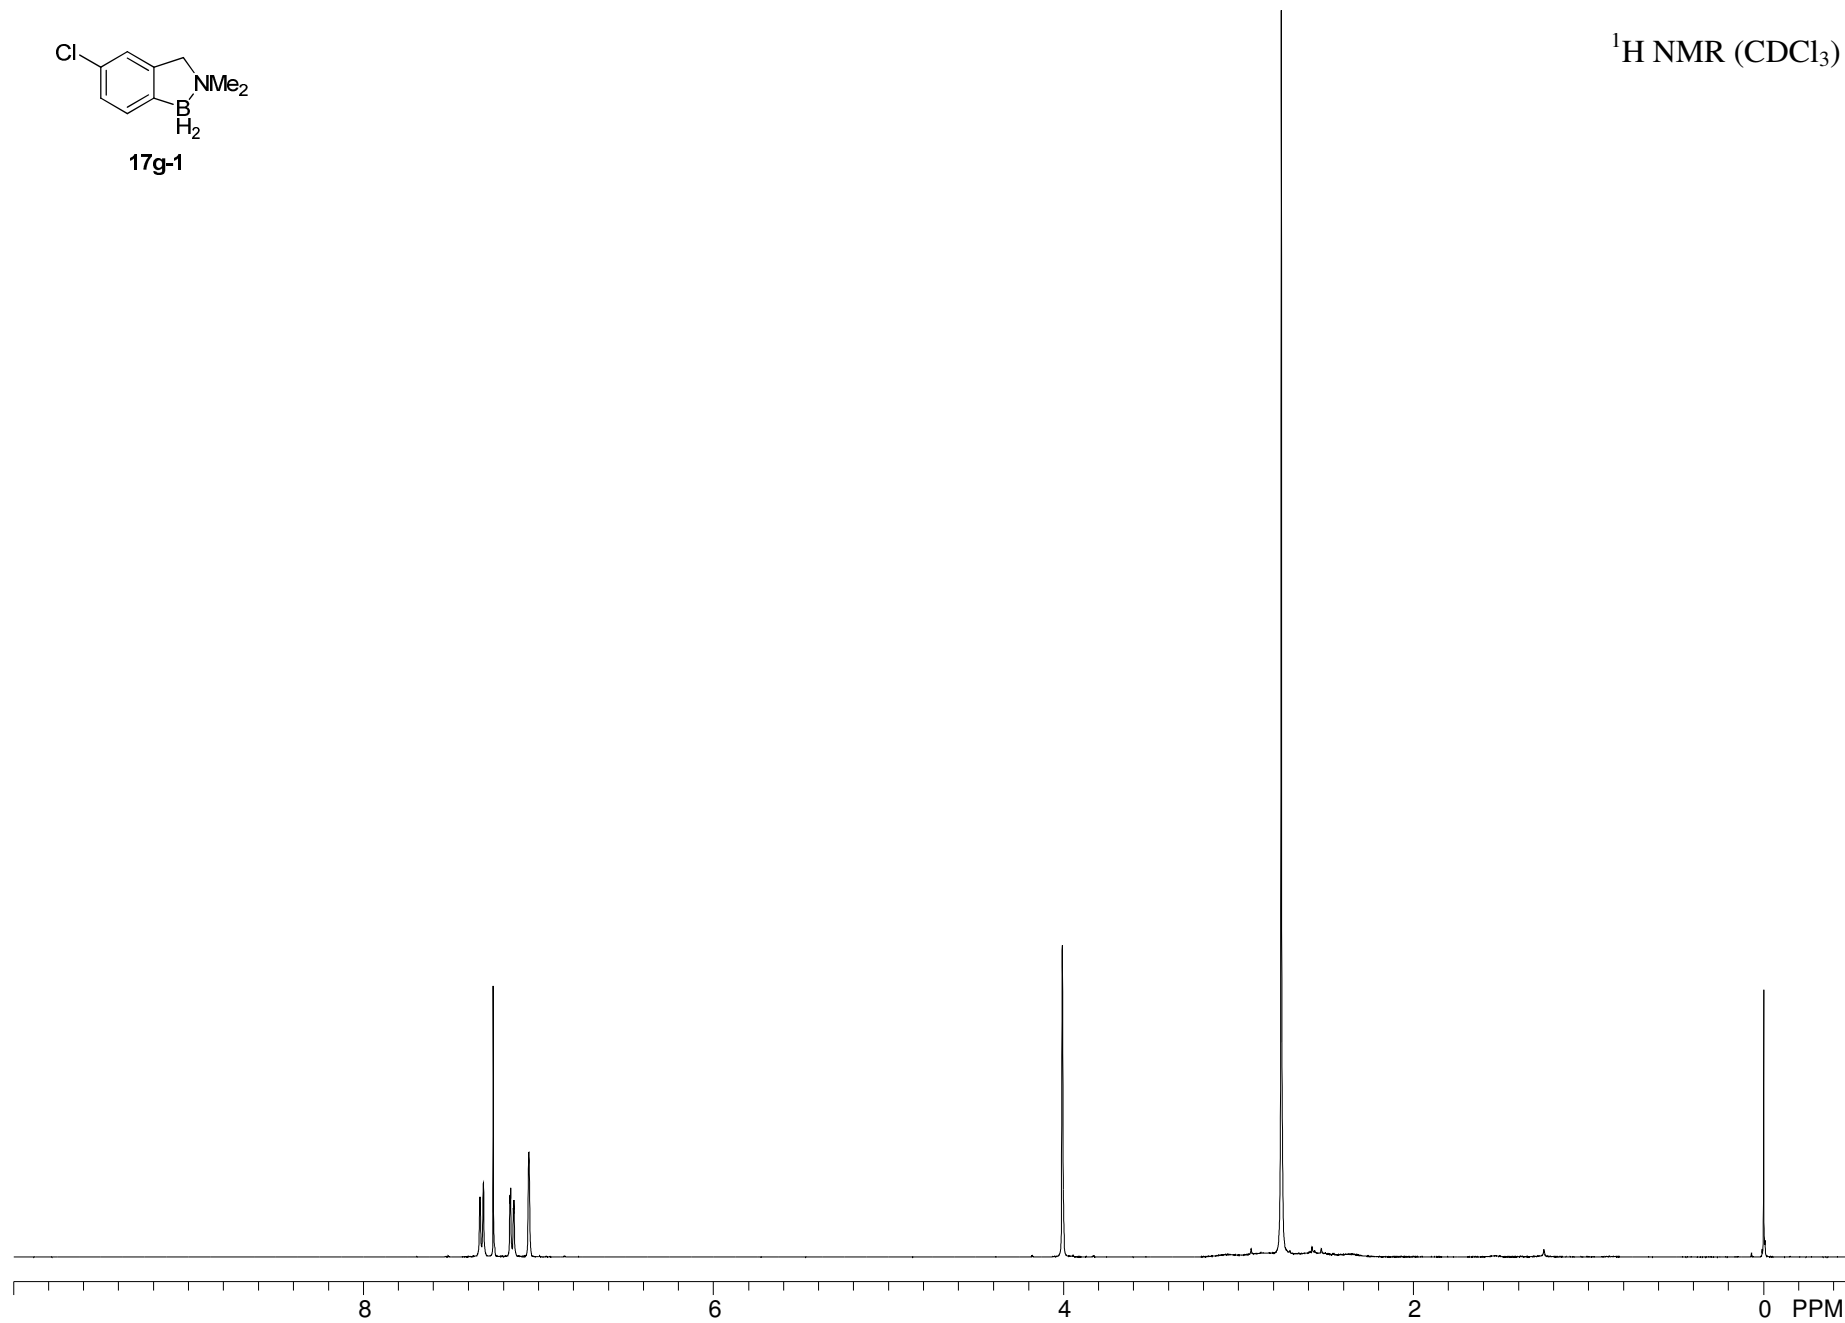



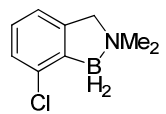

17g-2

<sup>1</sup>H NMR (CDCl<sub>3</sub>)

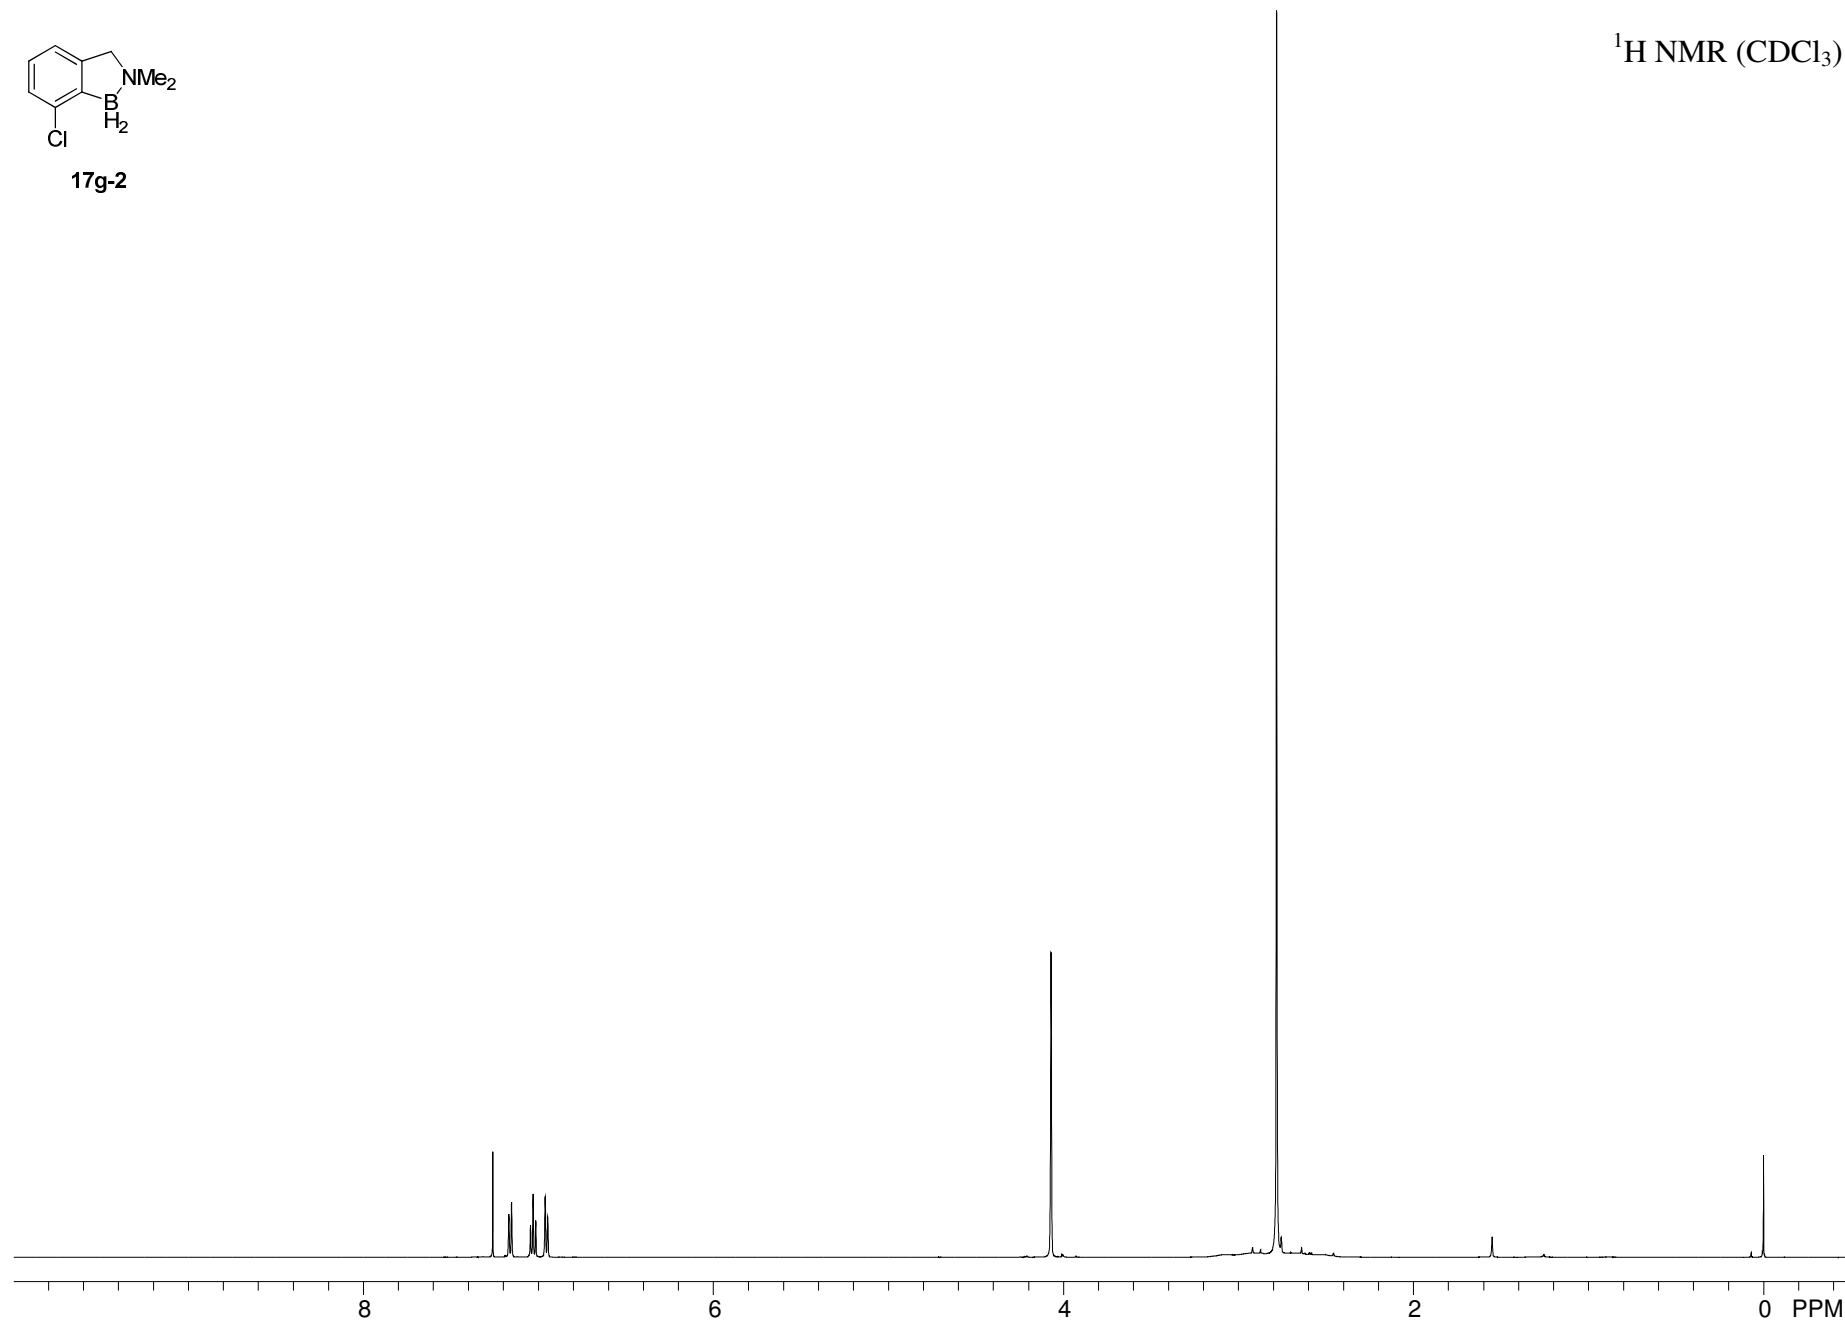

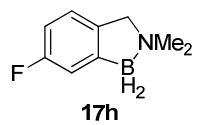

$^1\text{H NMR}$  ( $\text{CDCl}_3$ )

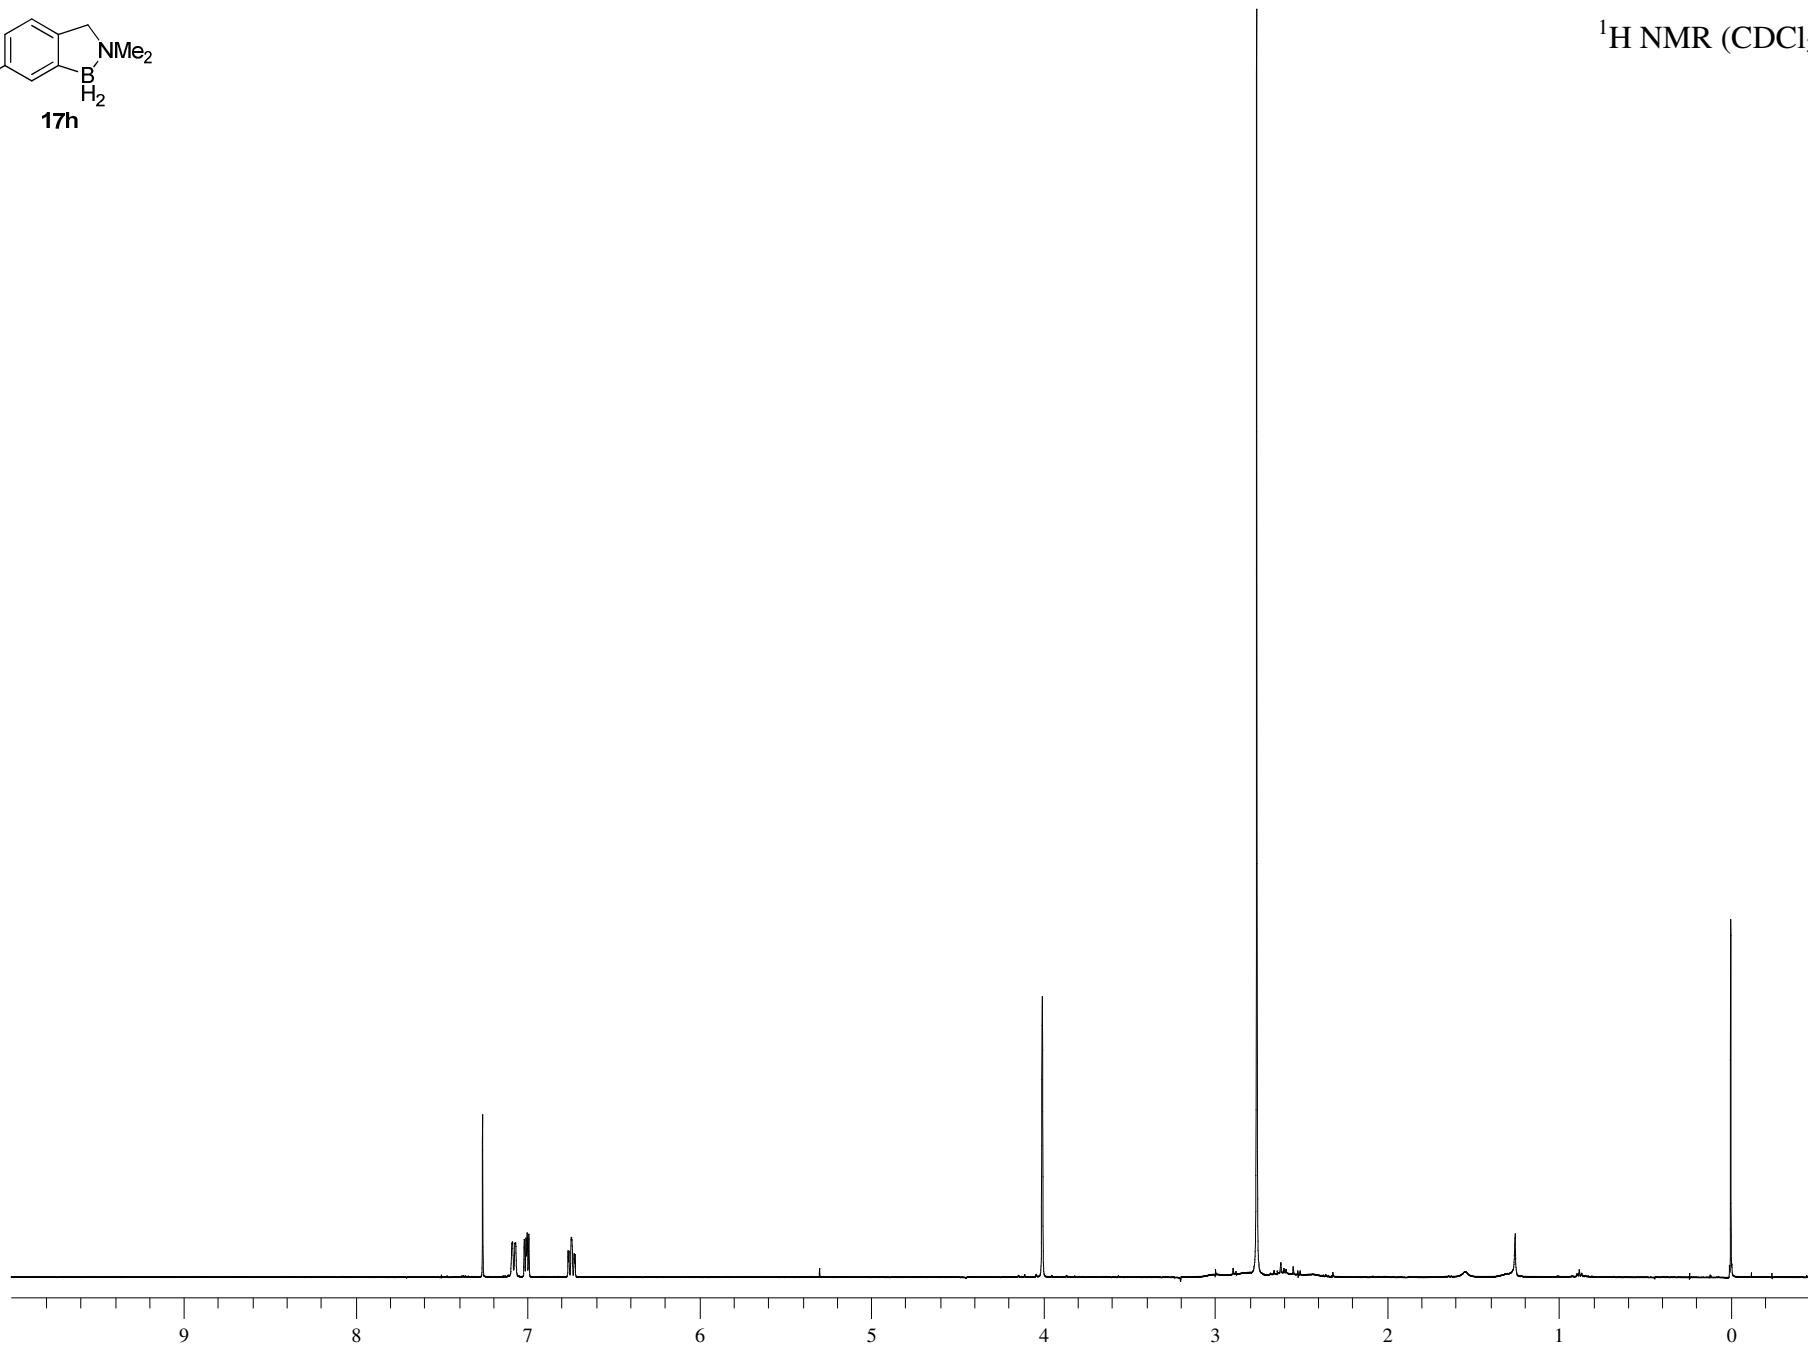

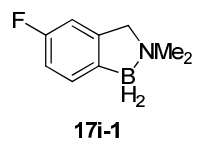

<sup>1</sup>H NMR (CDCl<sub>3</sub>)

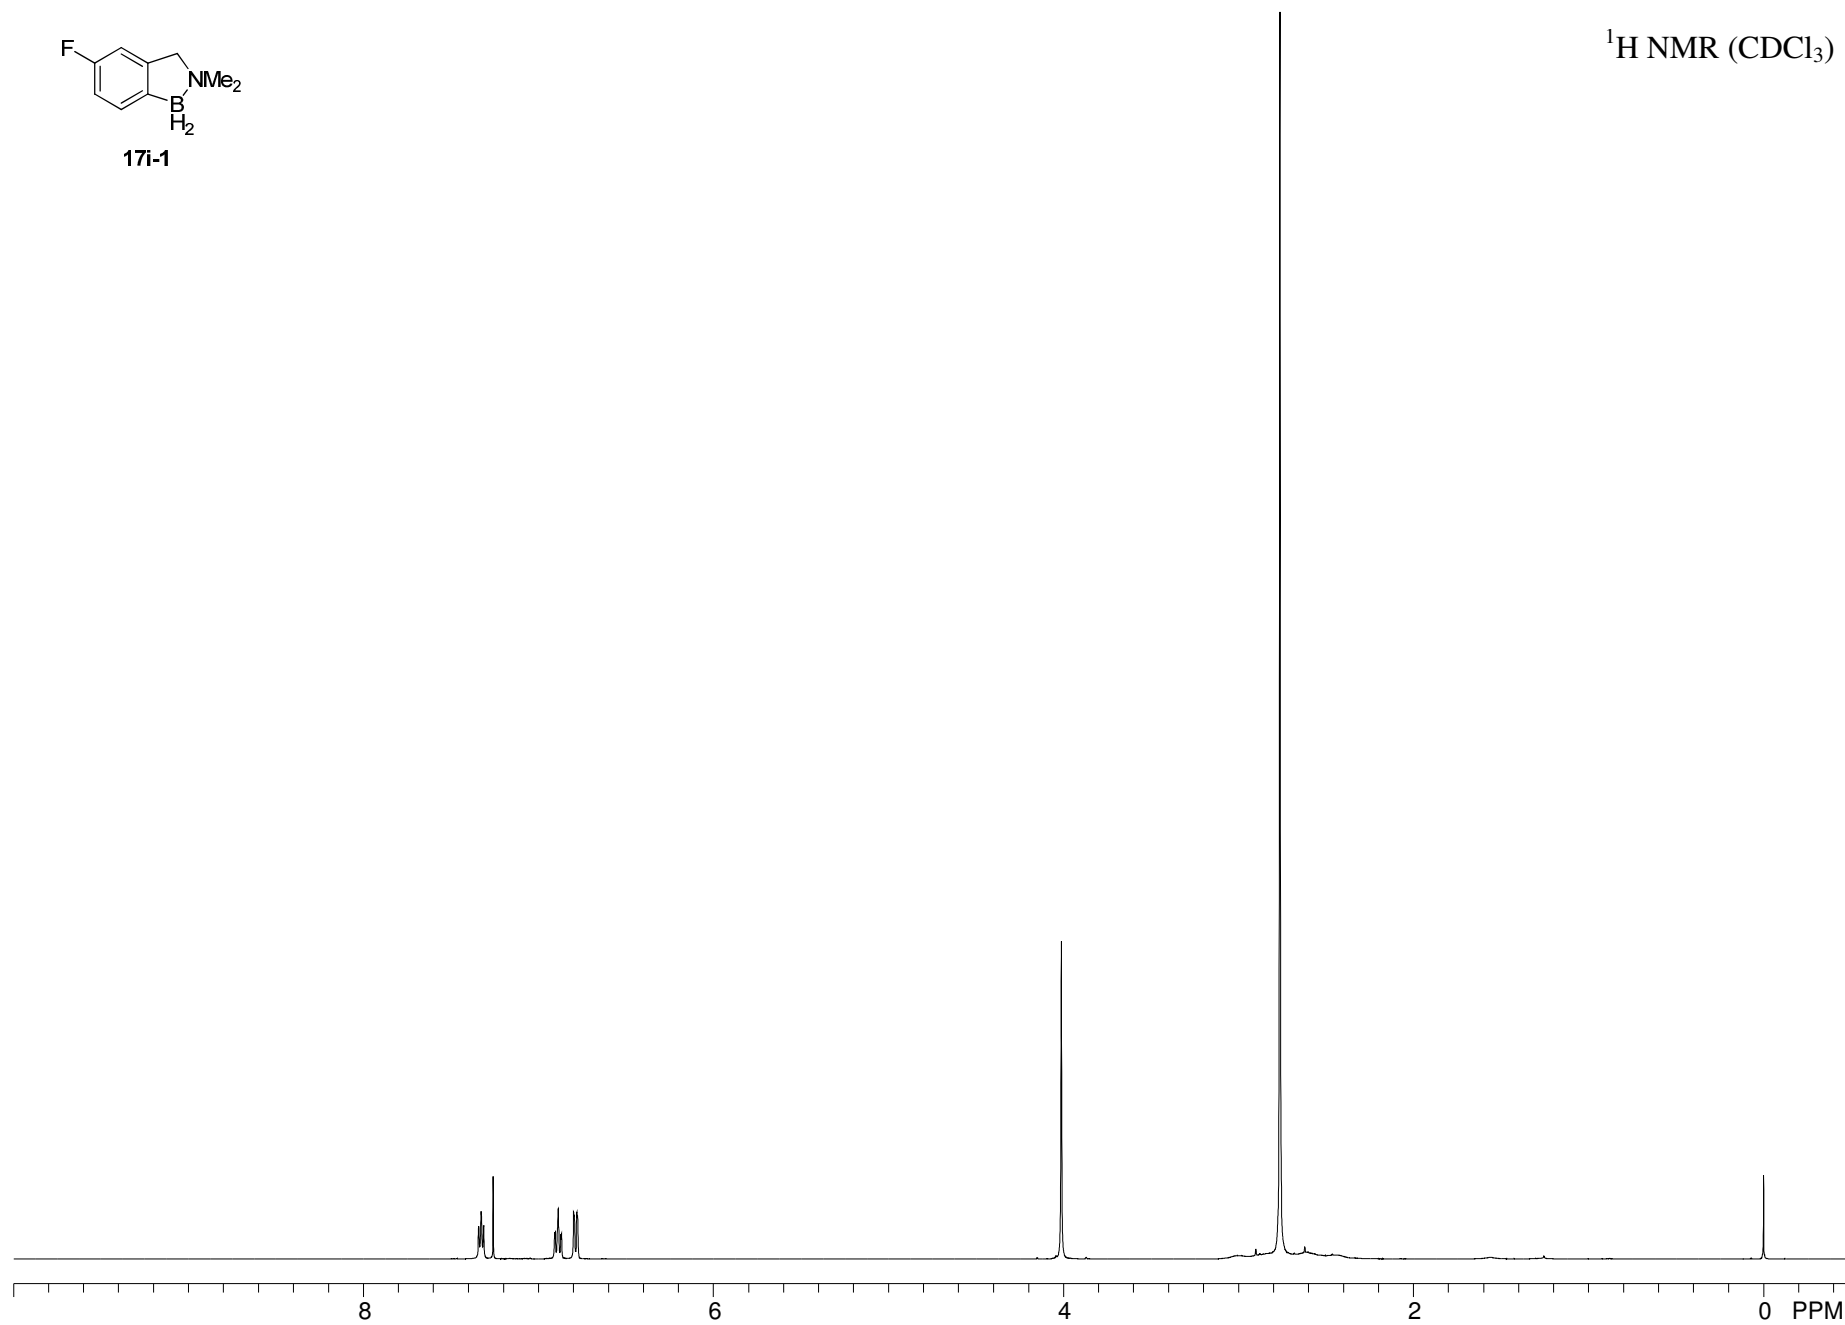

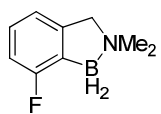

17i-2

<sup>1</sup>H NMR (CDCl<sub>3</sub>)

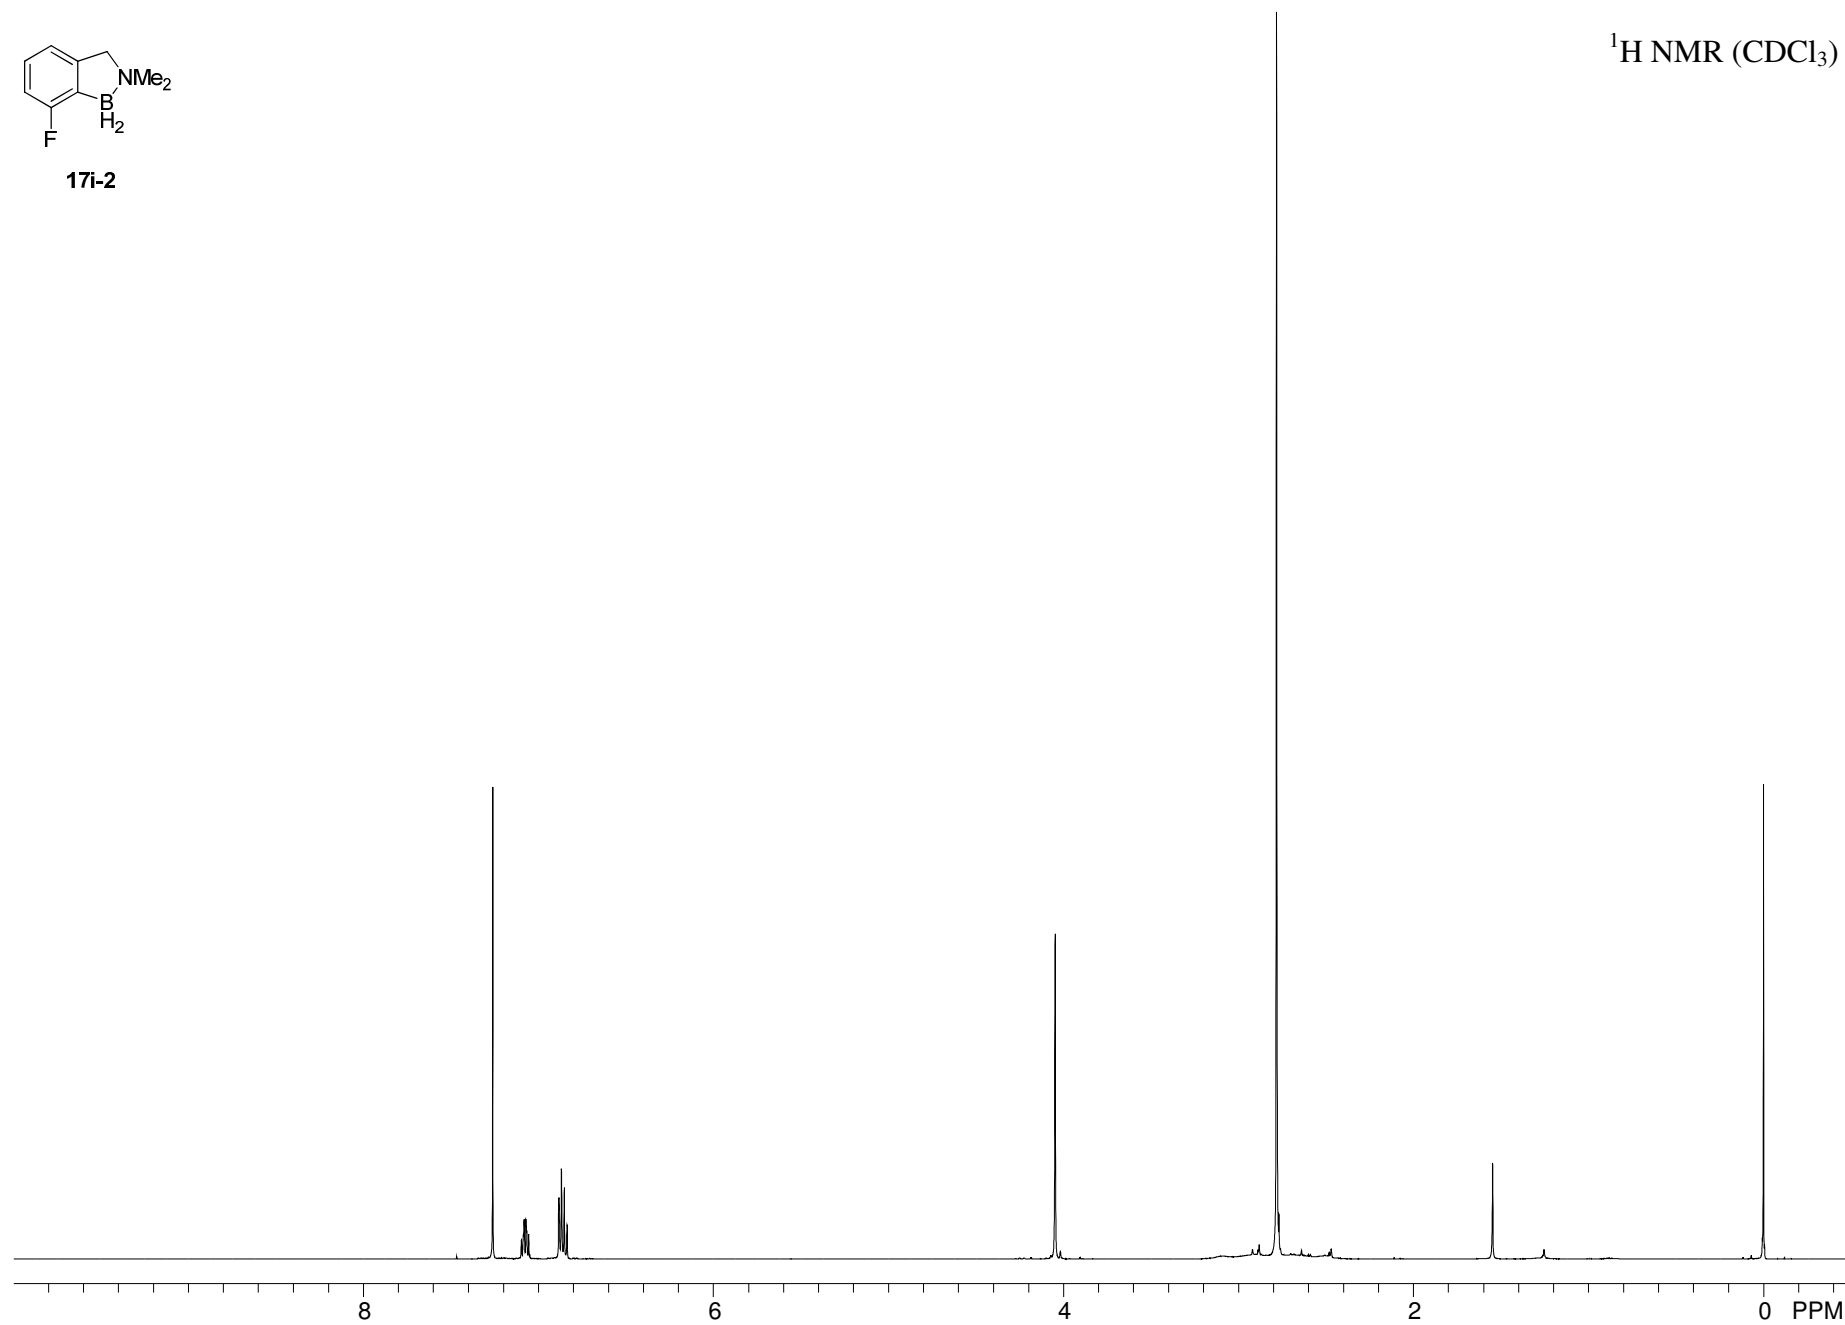

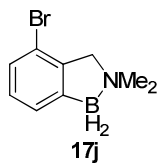

$^1\text{H NMR}$  ( $\text{CDCl}_3$ )

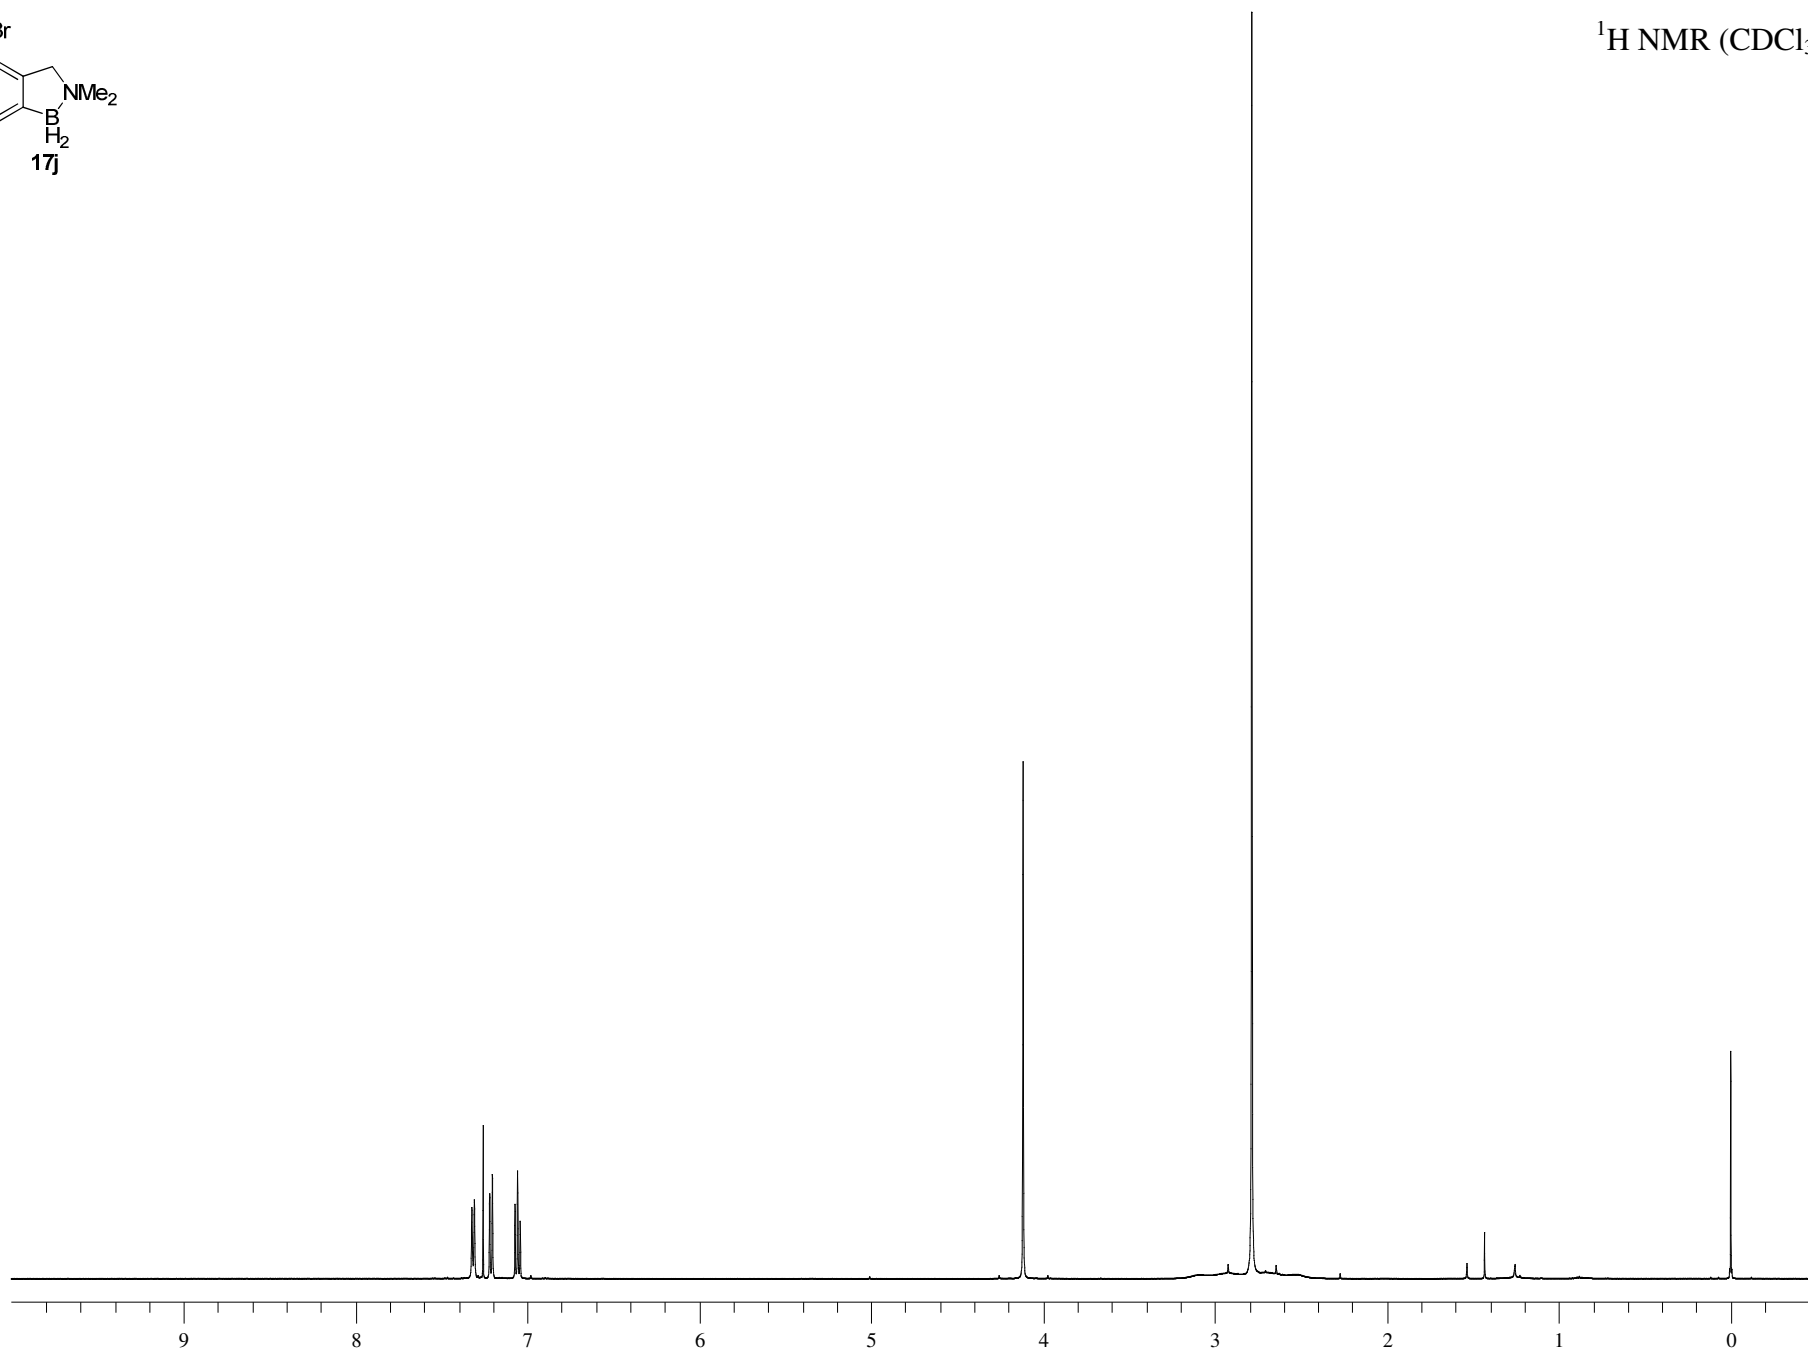

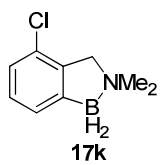

$^1\text{H NMR}$  ( $\text{CDCl}_3$ )

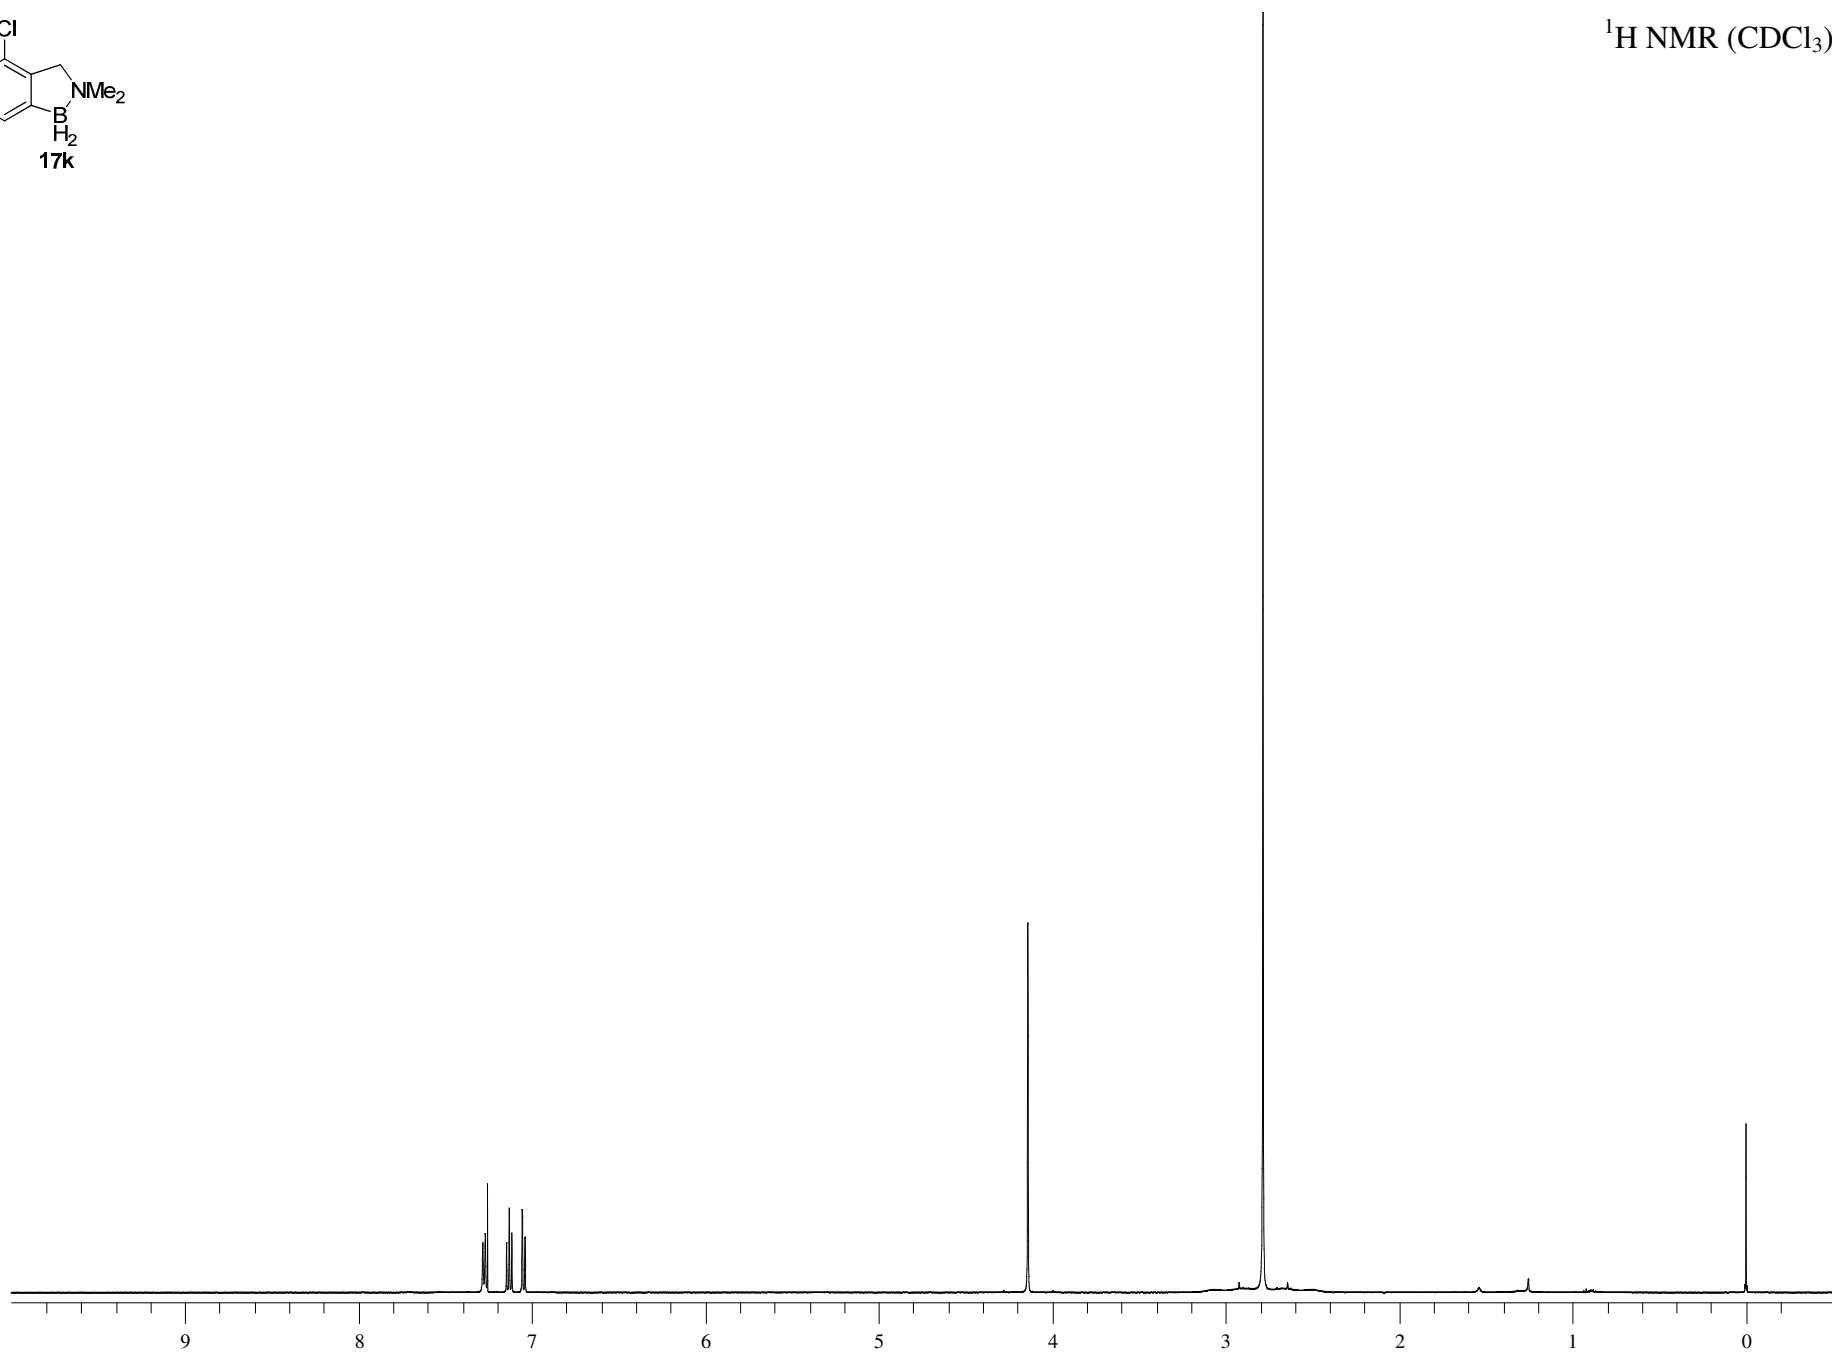

S-55

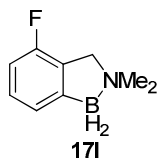

$^1\text{H NMR}$  ( $\text{CDCl}_3$ )

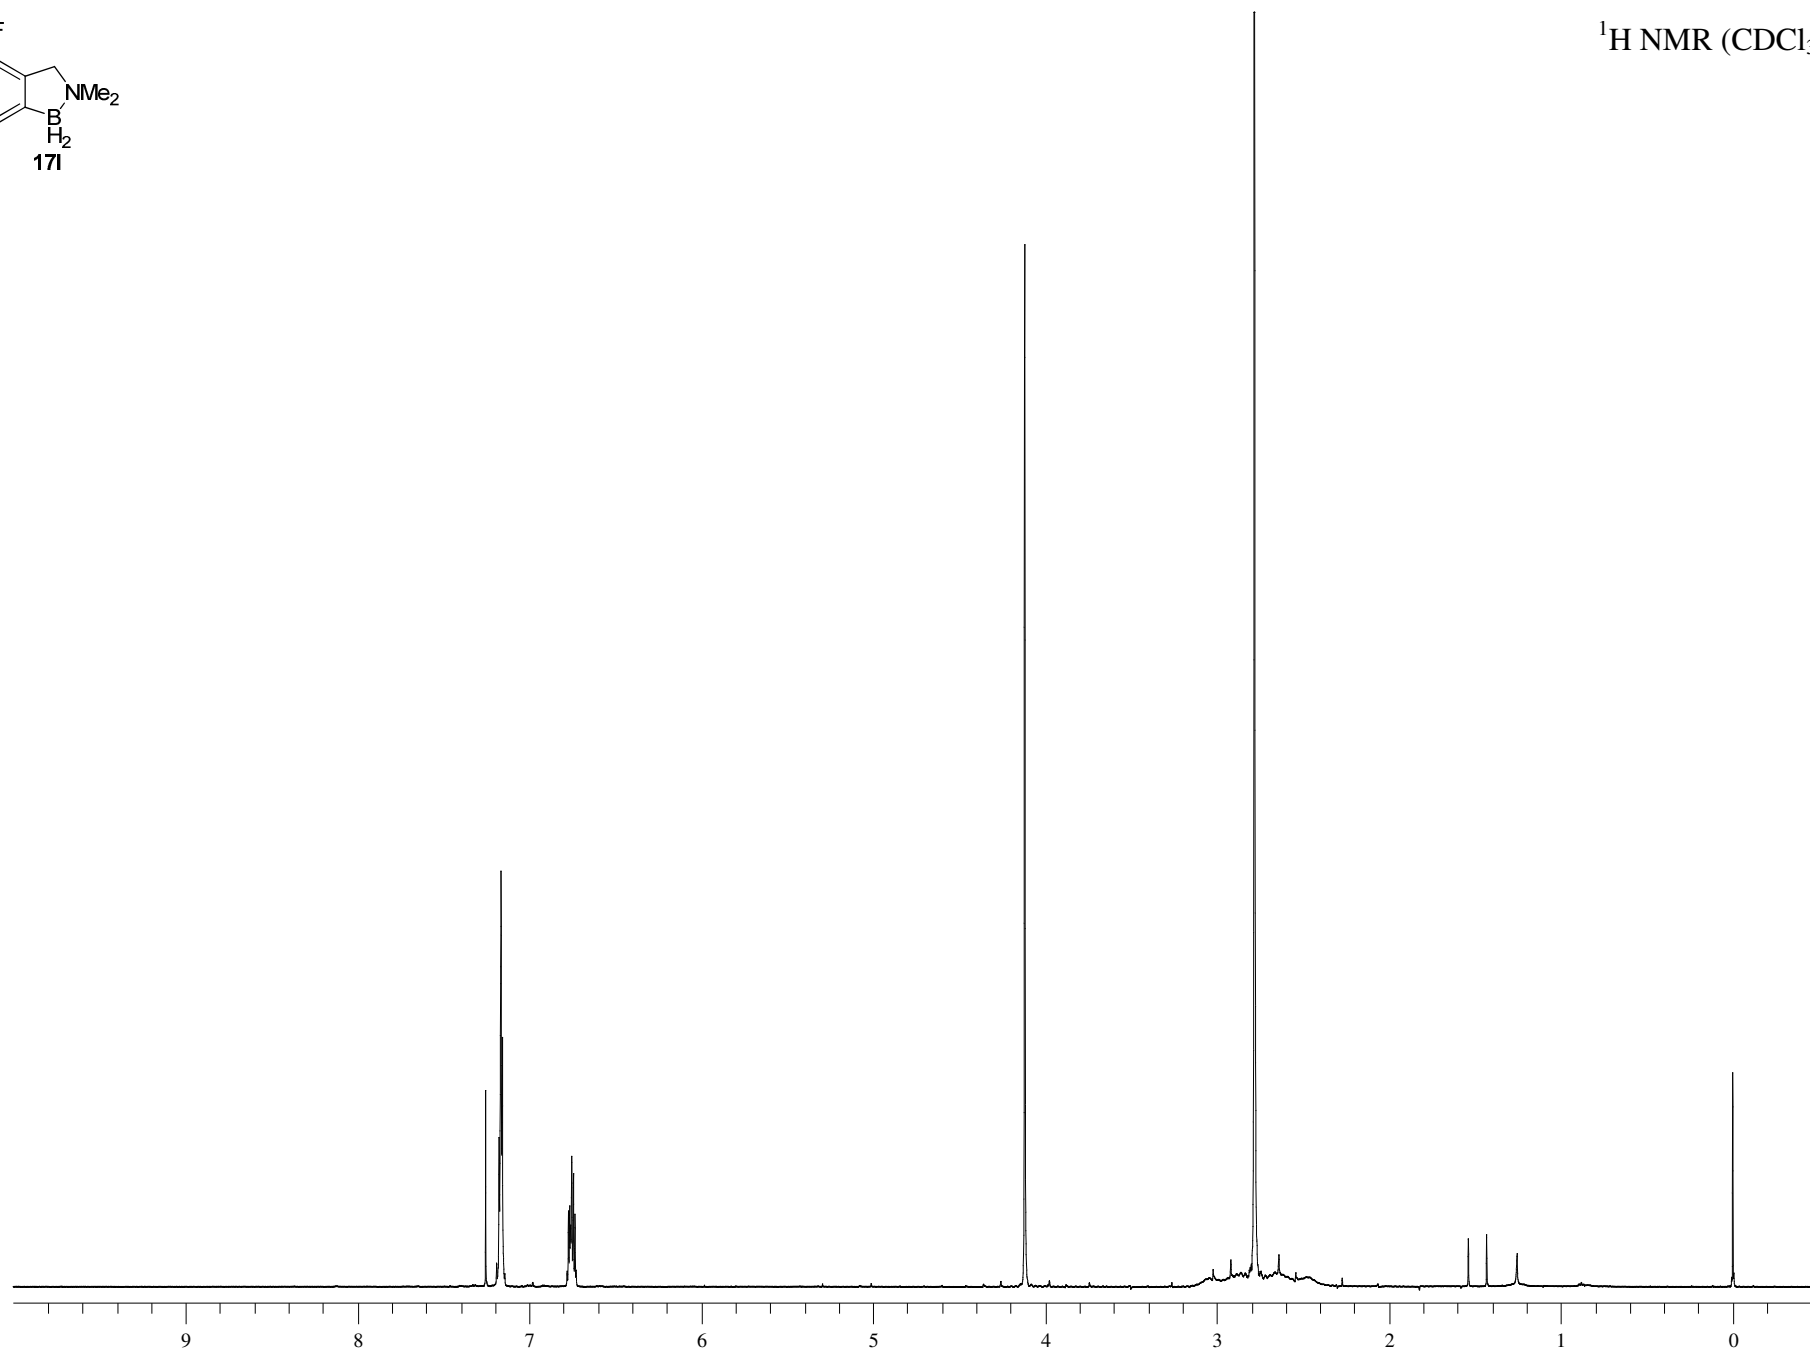

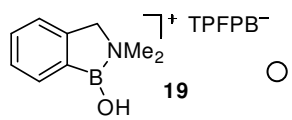

PhH ●

solvent □

<sup>1</sup>H NMR (CD<sub>2</sub>Cl<sub>2</sub>)

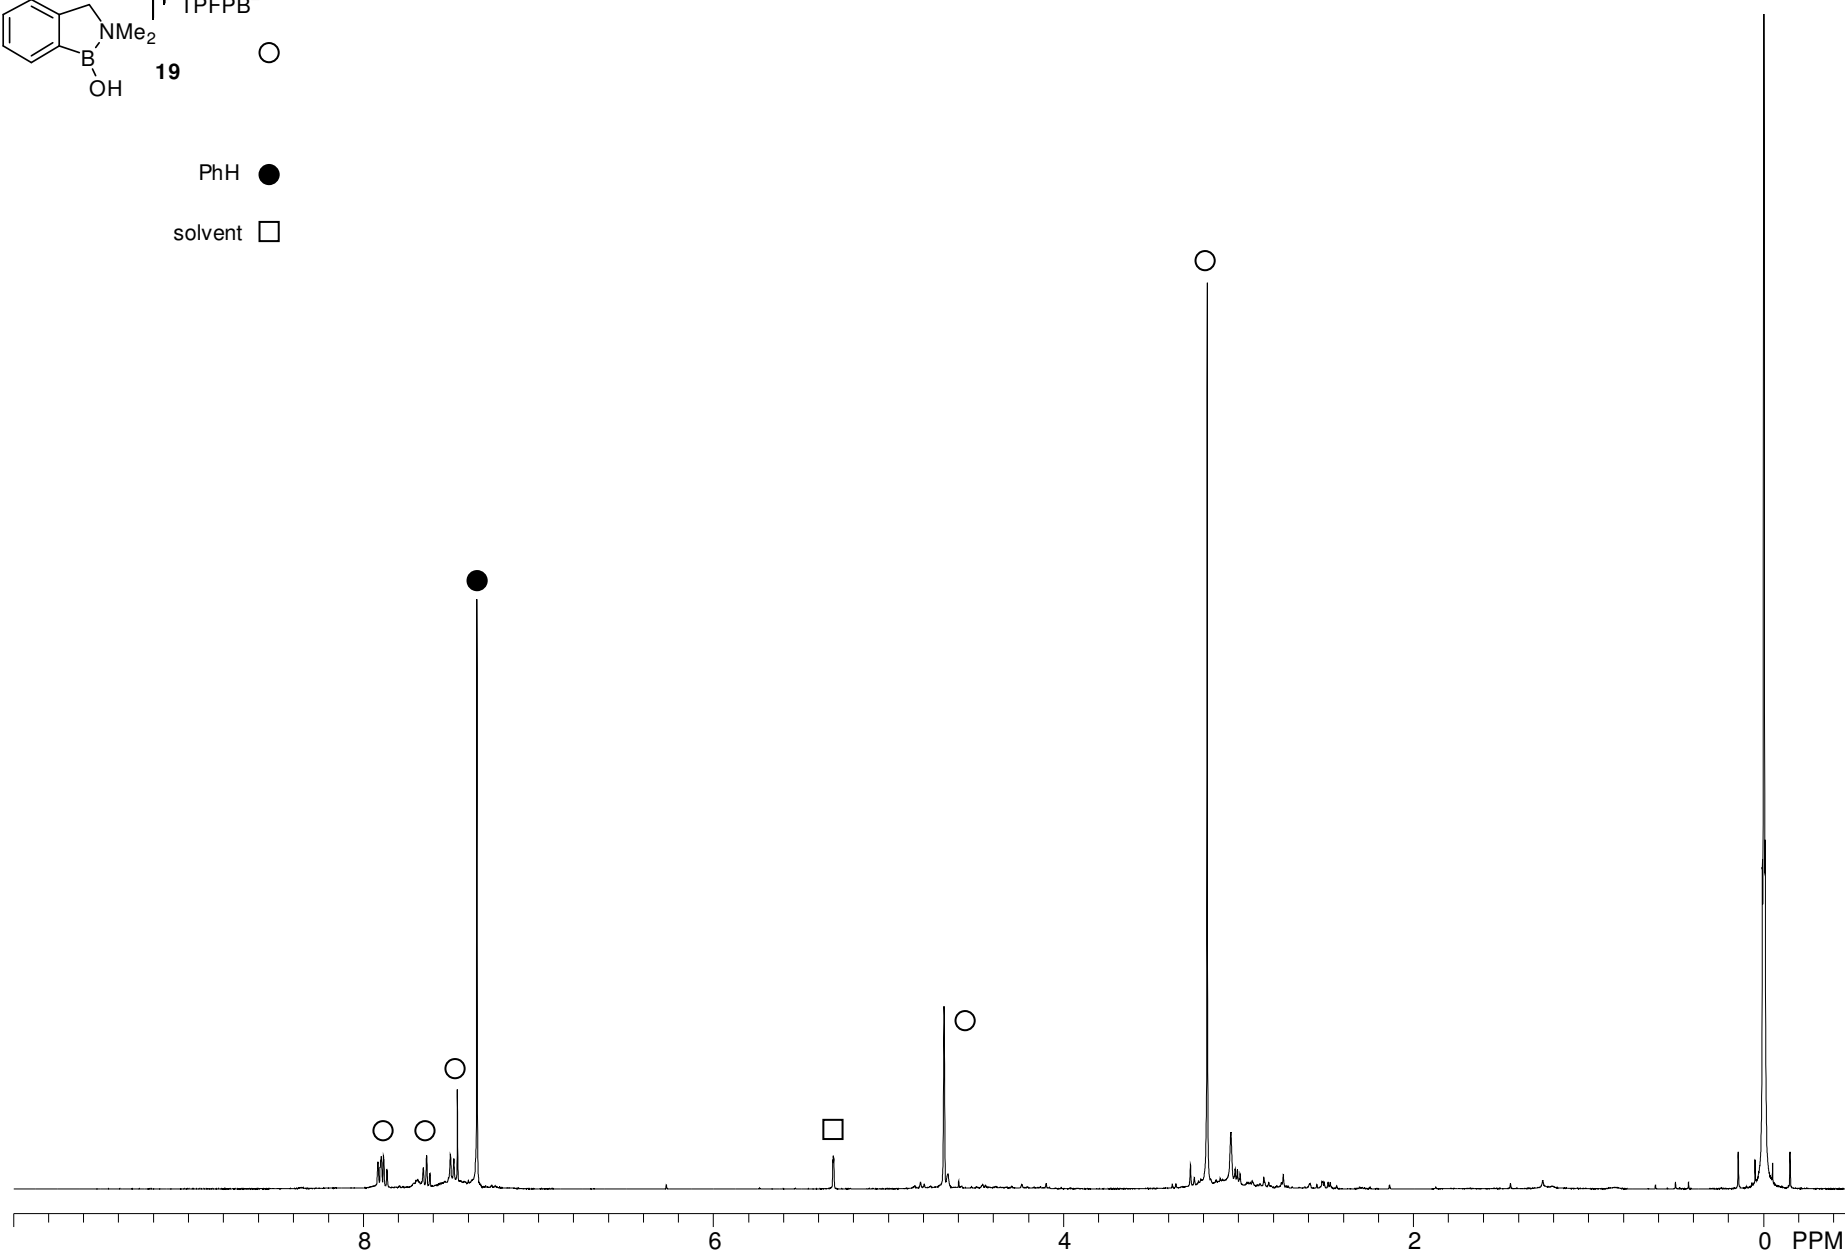



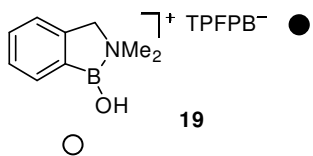

$^{11}\text{B}$  NMR ( $\text{CD}_2\text{Cl}_2$ )

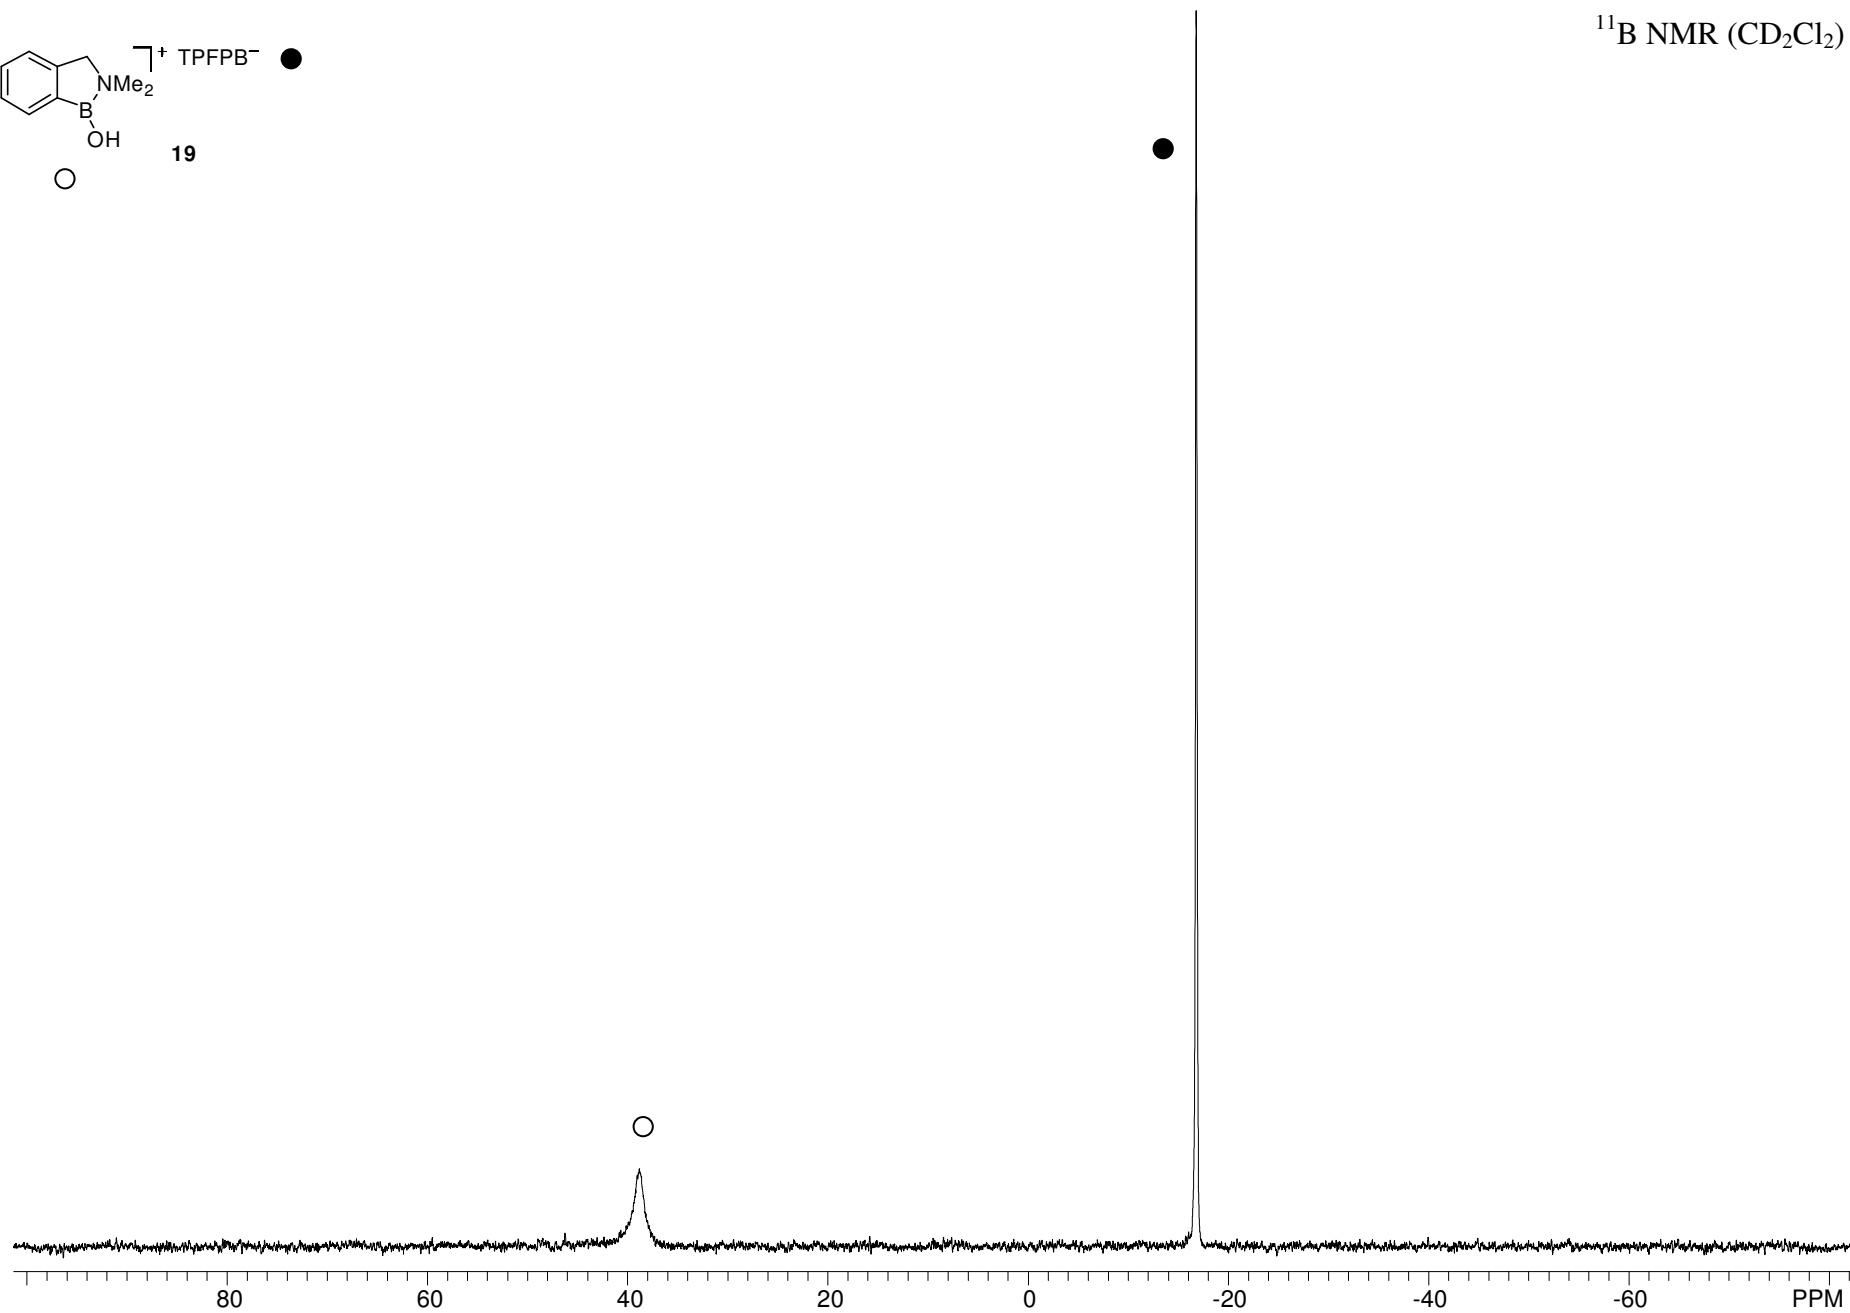

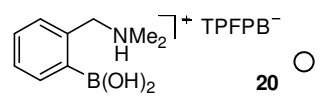

Et<sub>2</sub>O ●

solvent □

<sup>1</sup>H NMR (CD<sub>2</sub>Cl<sub>2</sub>)

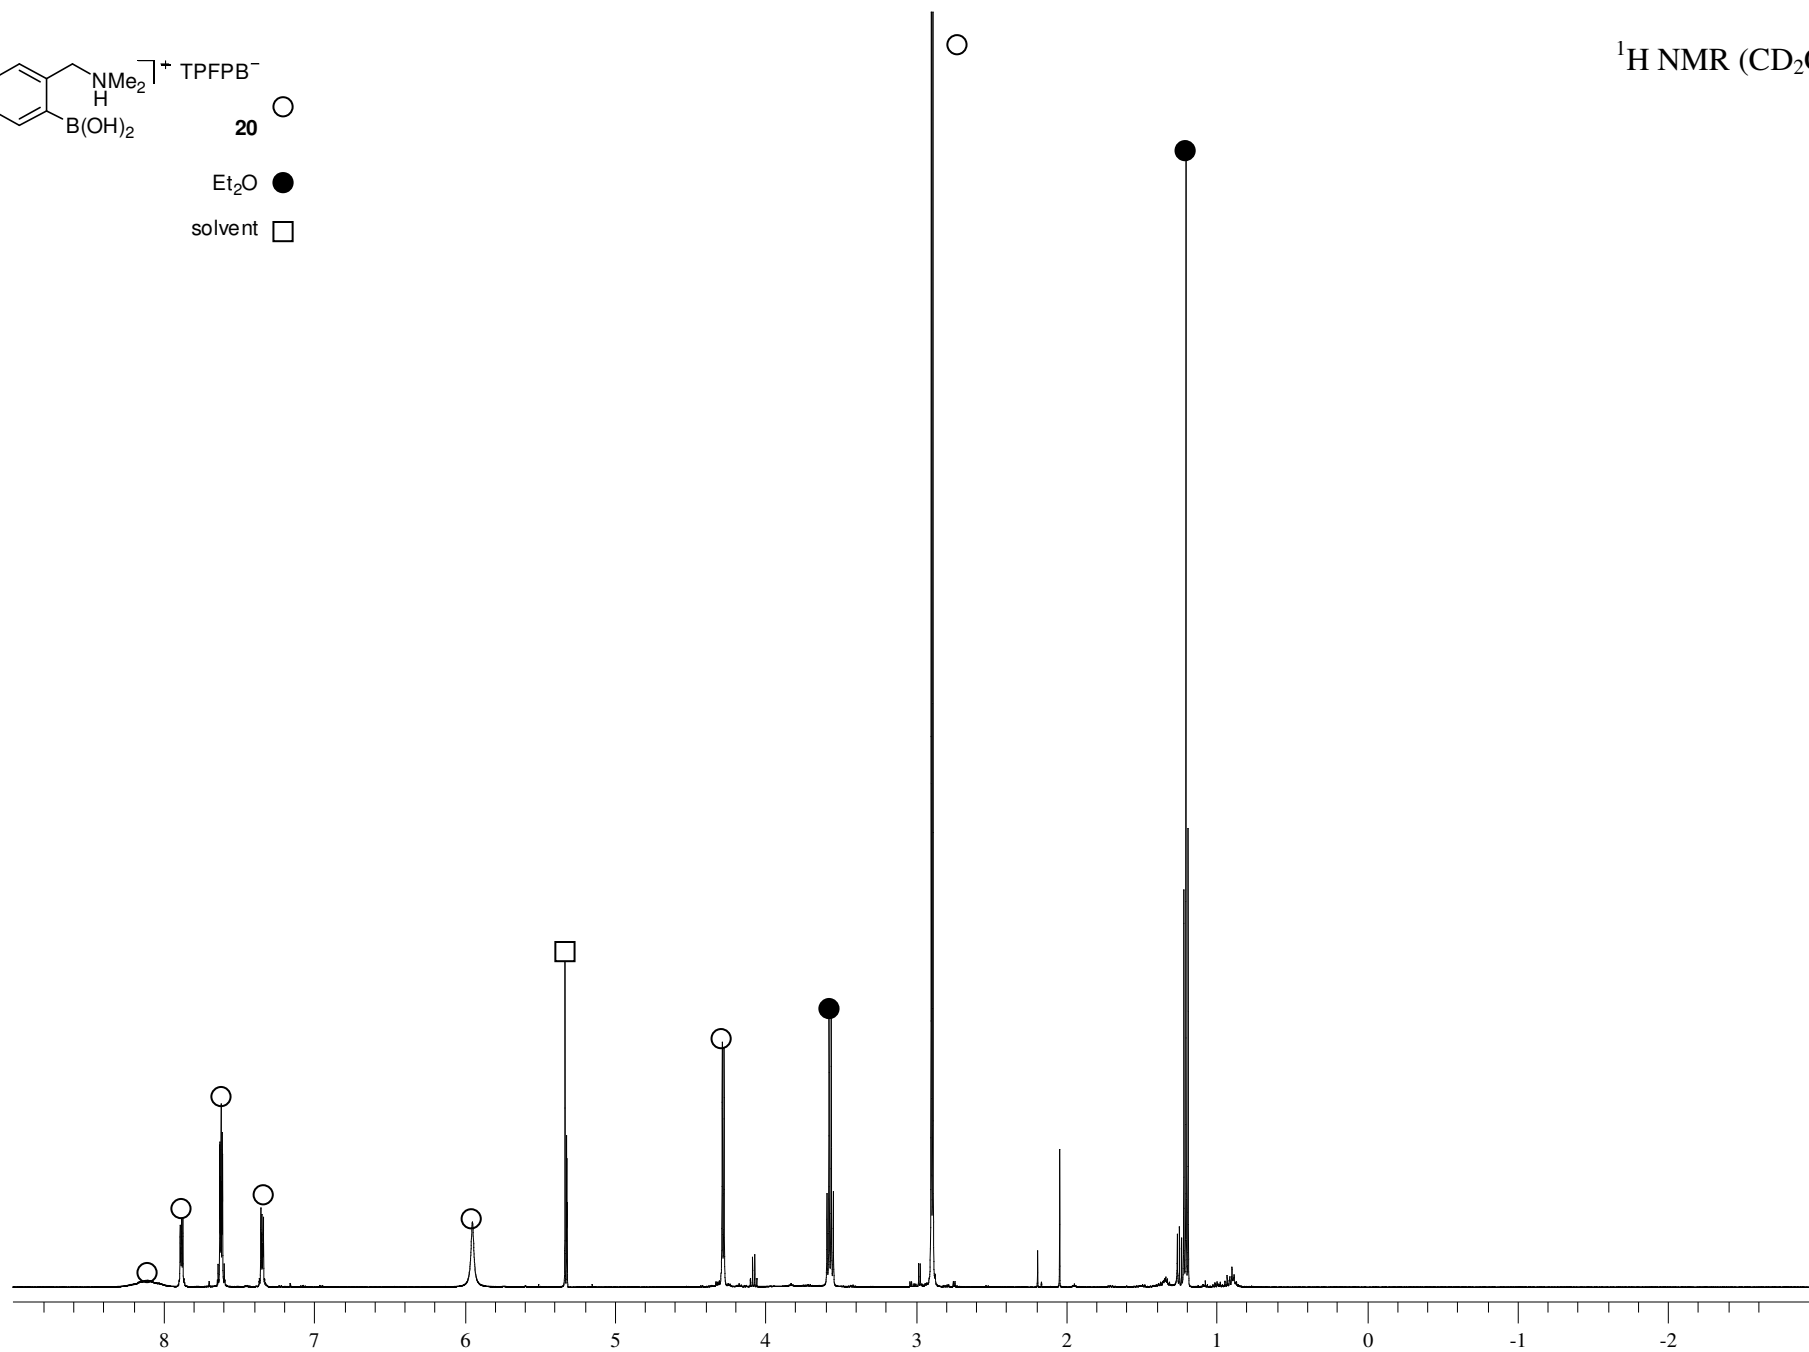

S-59

$^{11}\text{B}$  NMR ( $\text{CD}_2\text{Cl}_2$ )  
{ $^1\text{H}$ } decoupled

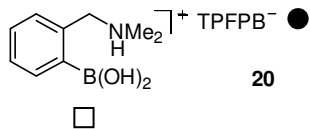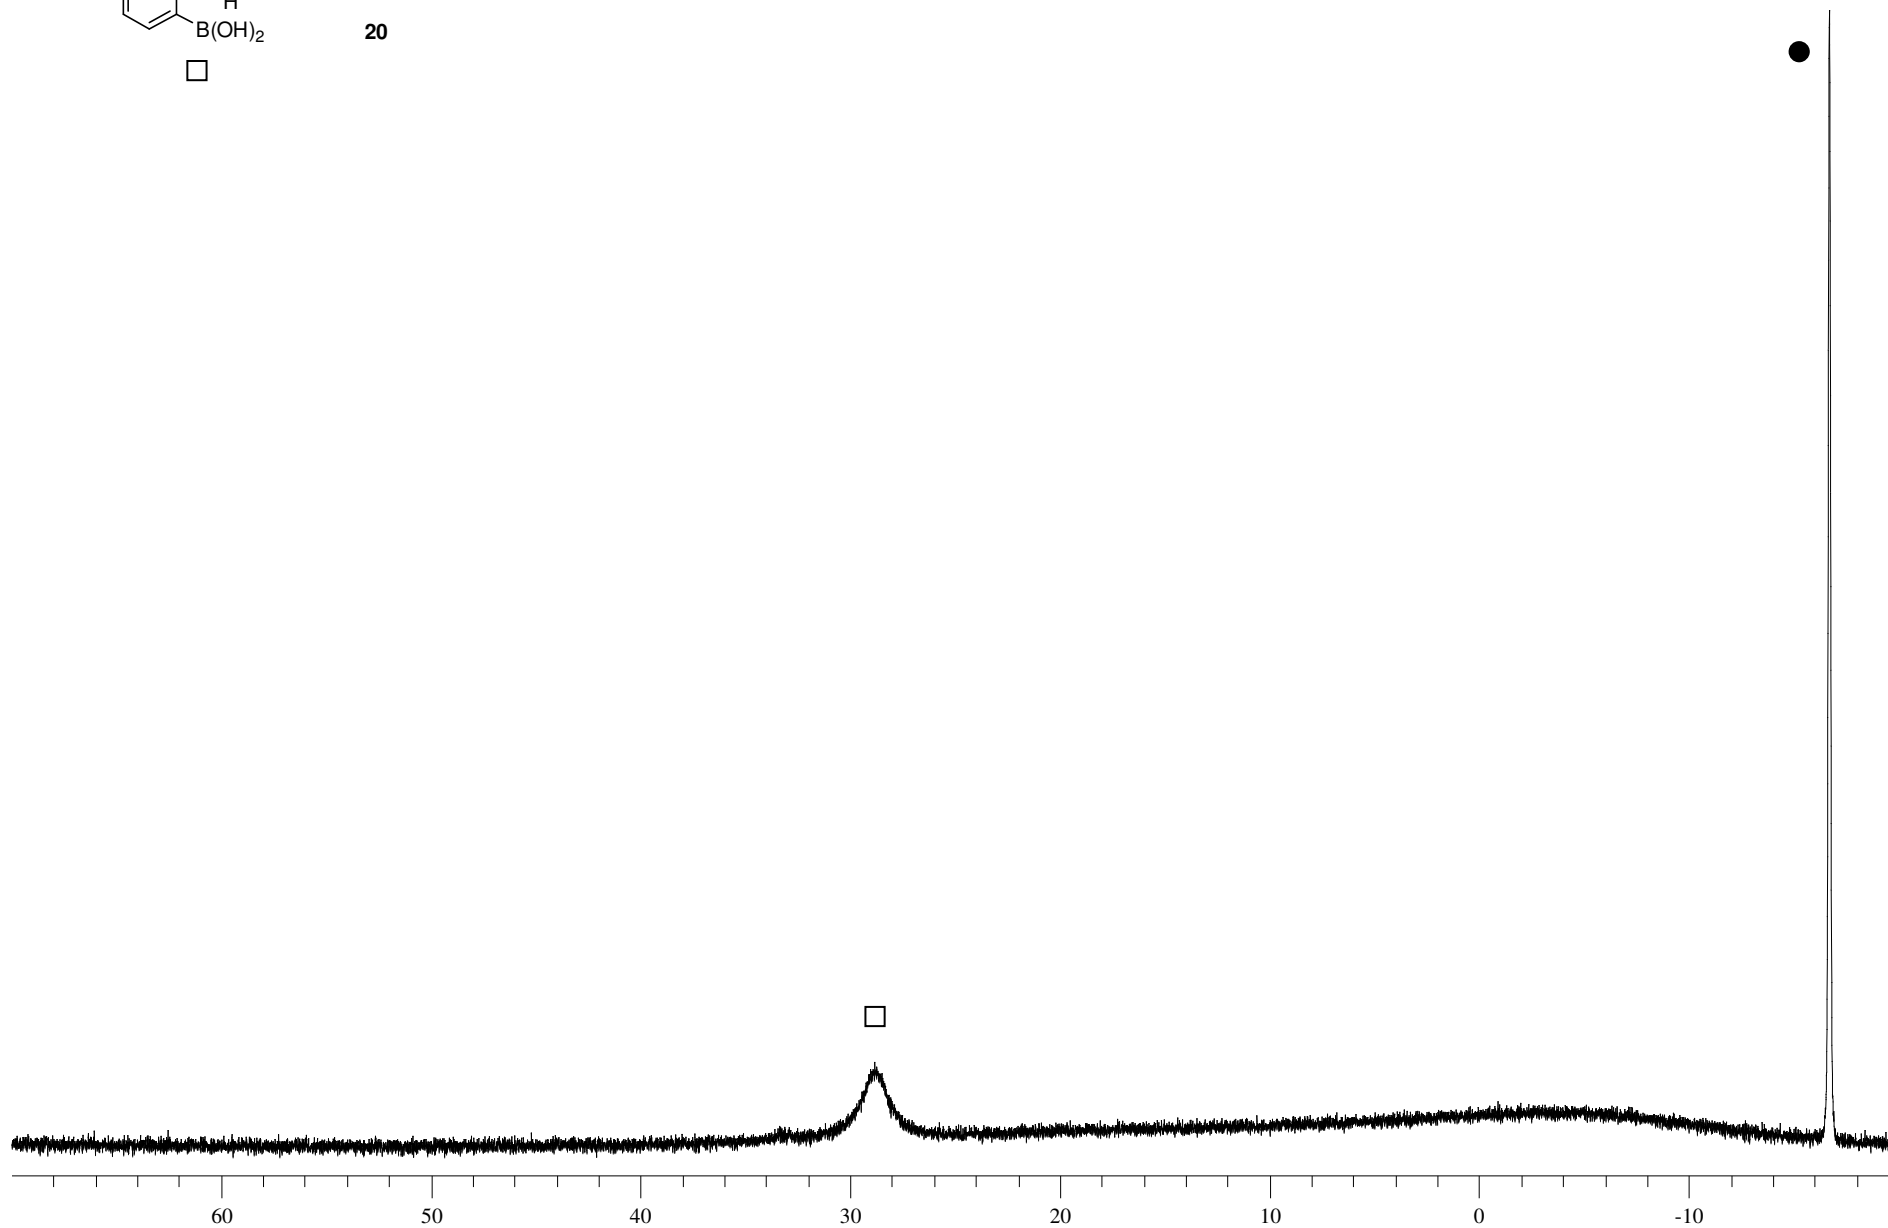

S-60

$^1\text{H NMR (C}_6\text{D}_5\text{Br)}$

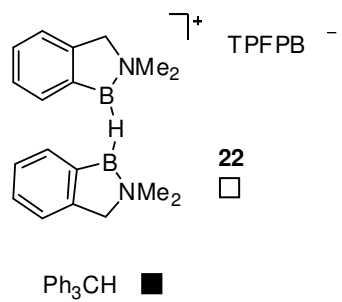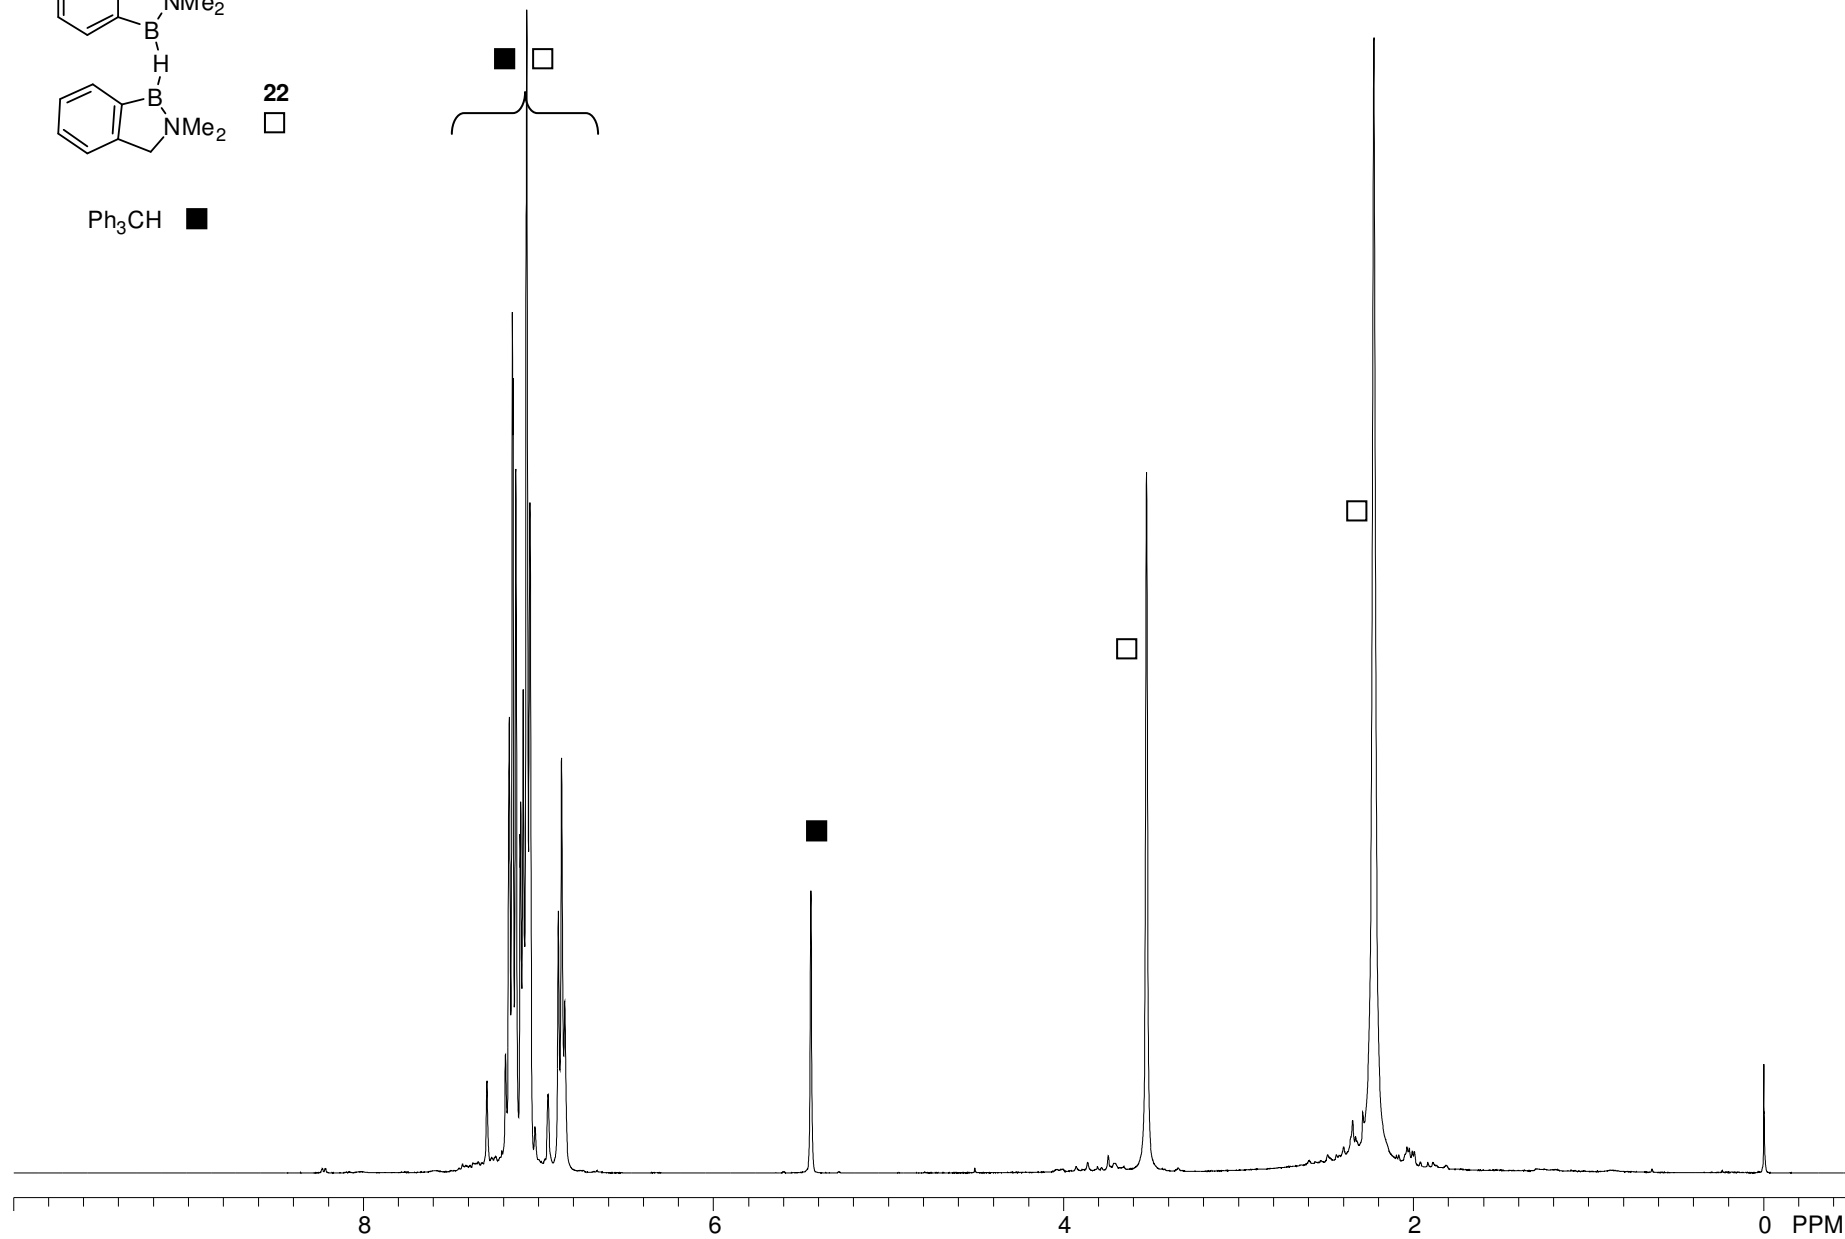

$^{11}\text{B}$  NMR ( $\text{C}_6\text{D}_5\text{Br}$ )

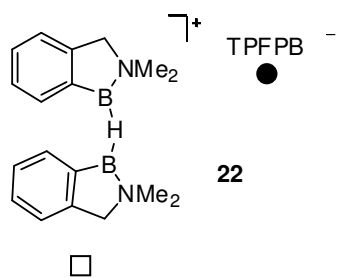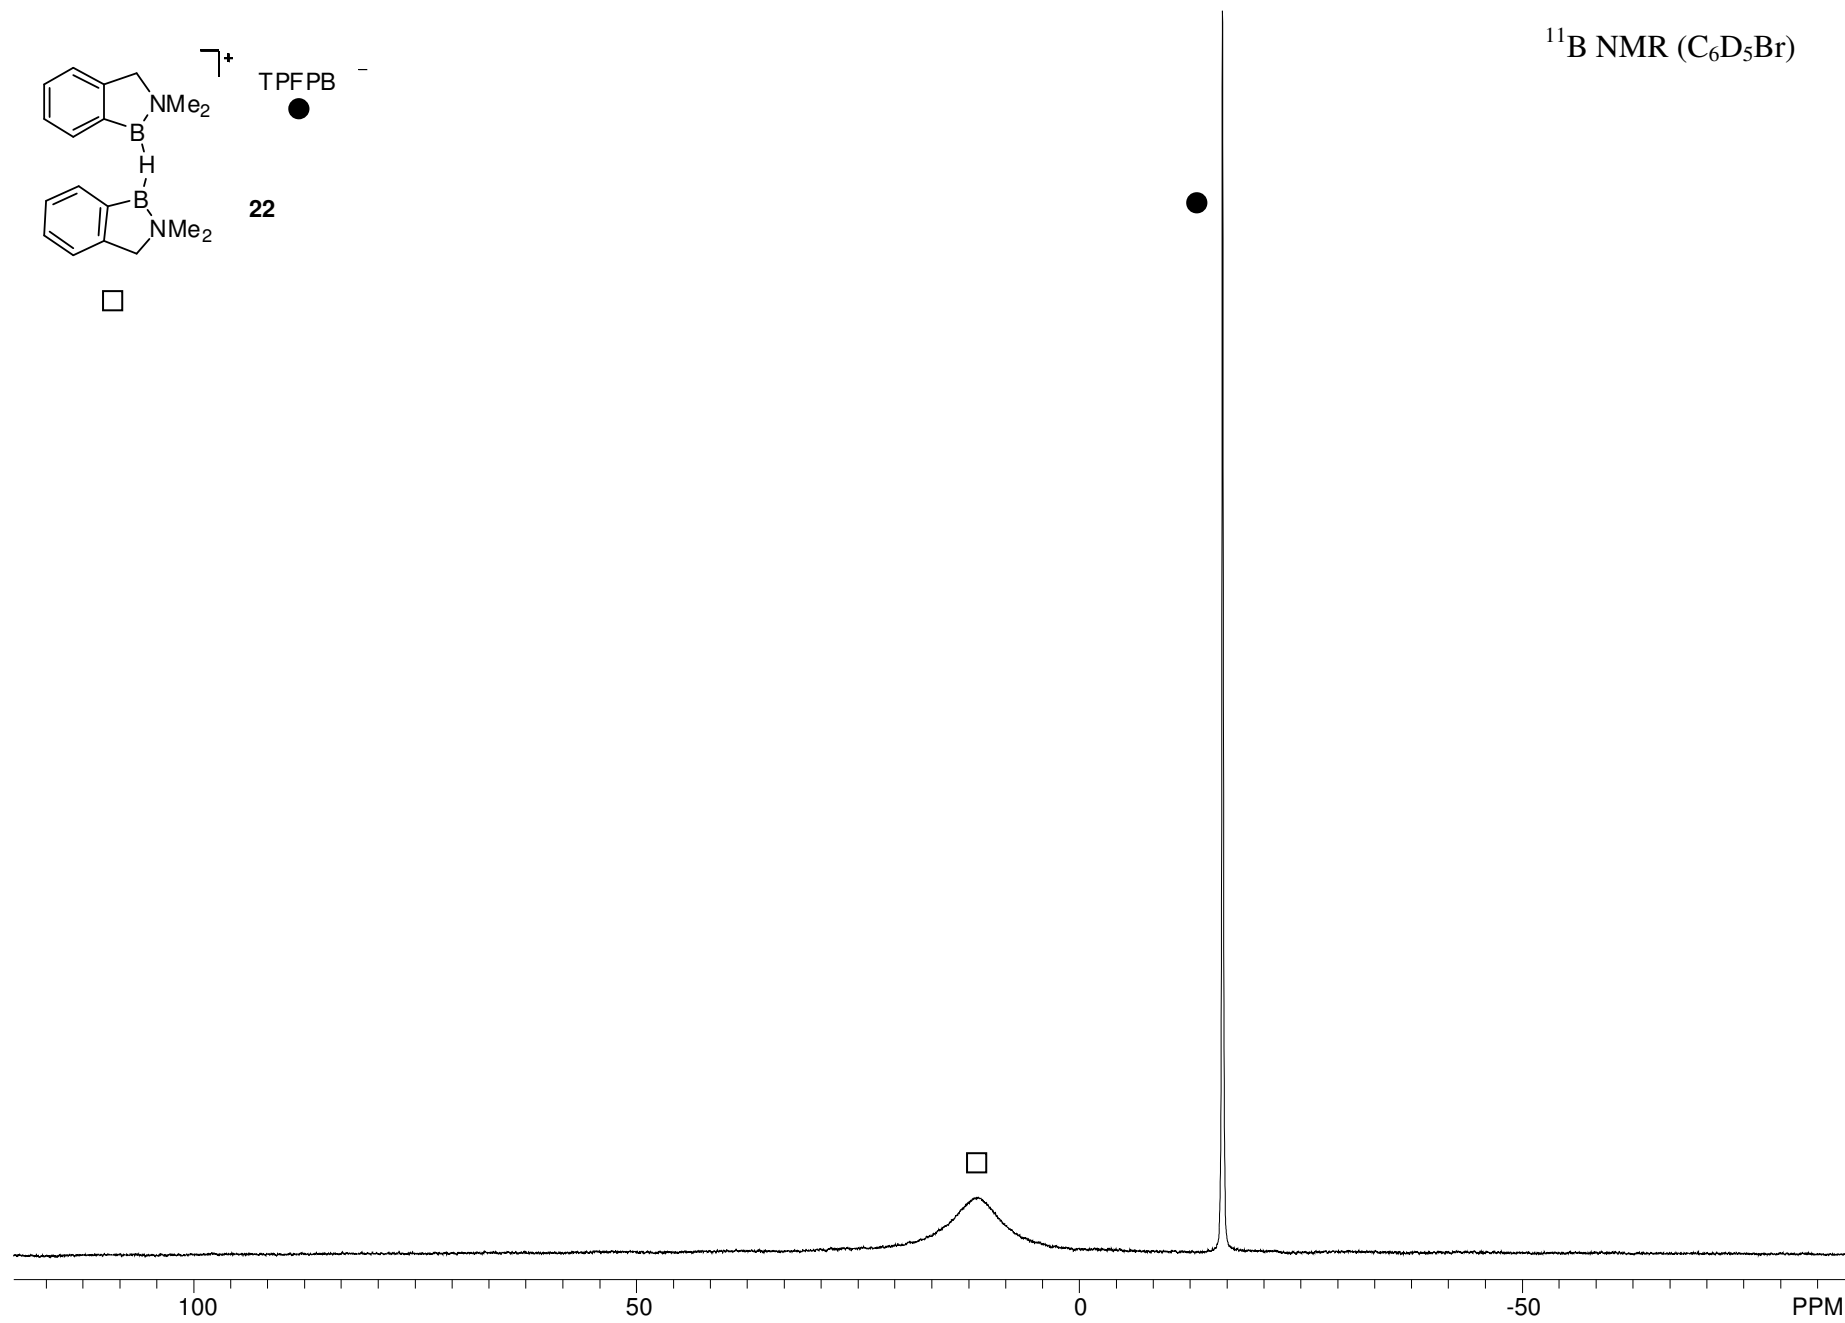

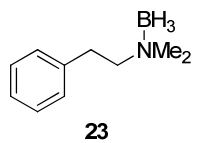

<sup>1</sup>H NMR (CDCl<sub>3</sub>)

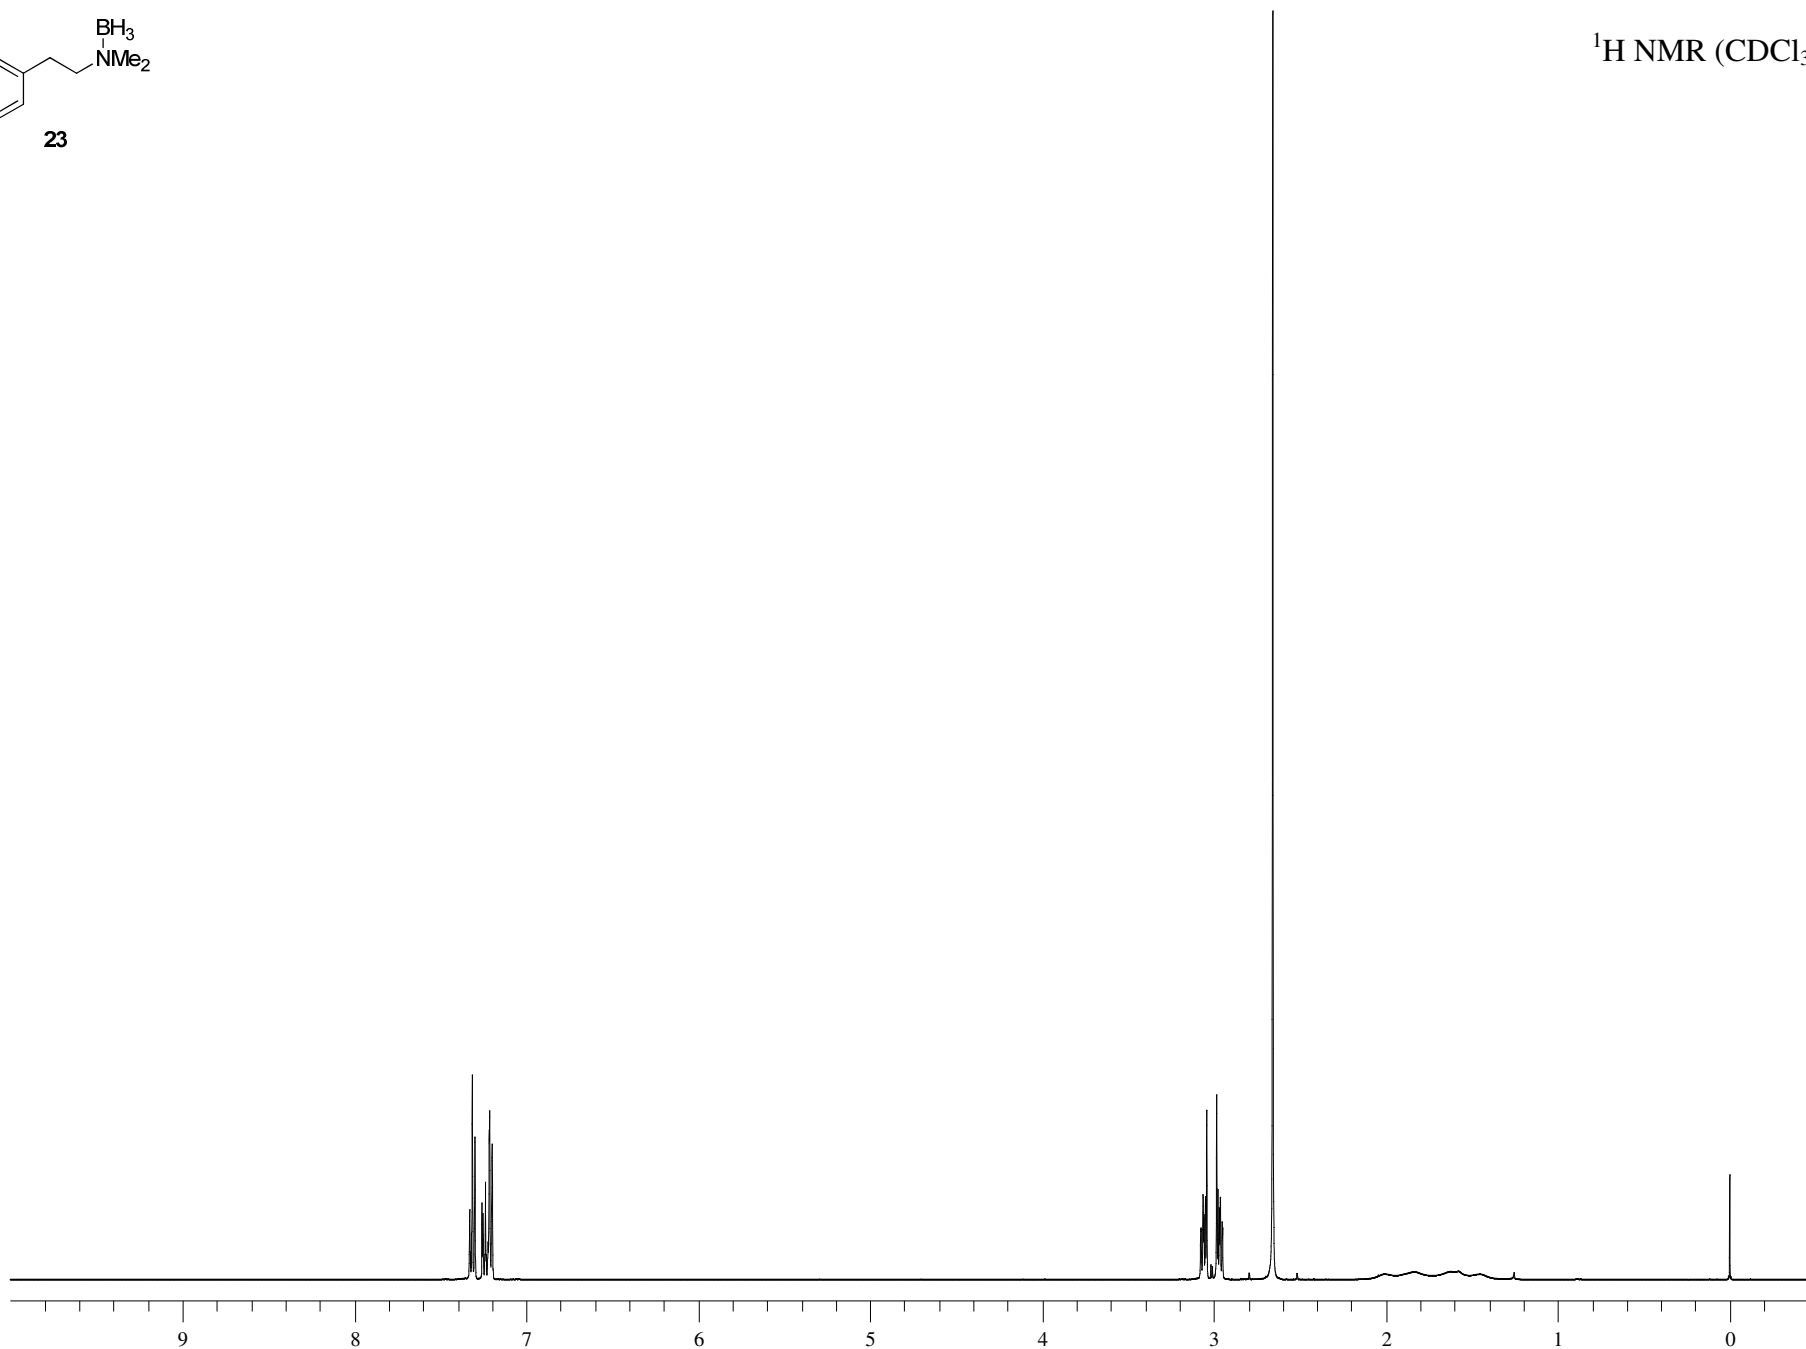

S-63

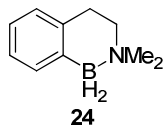

$^1\text{H NMR}$  ( $\text{CDCl}_3$ )

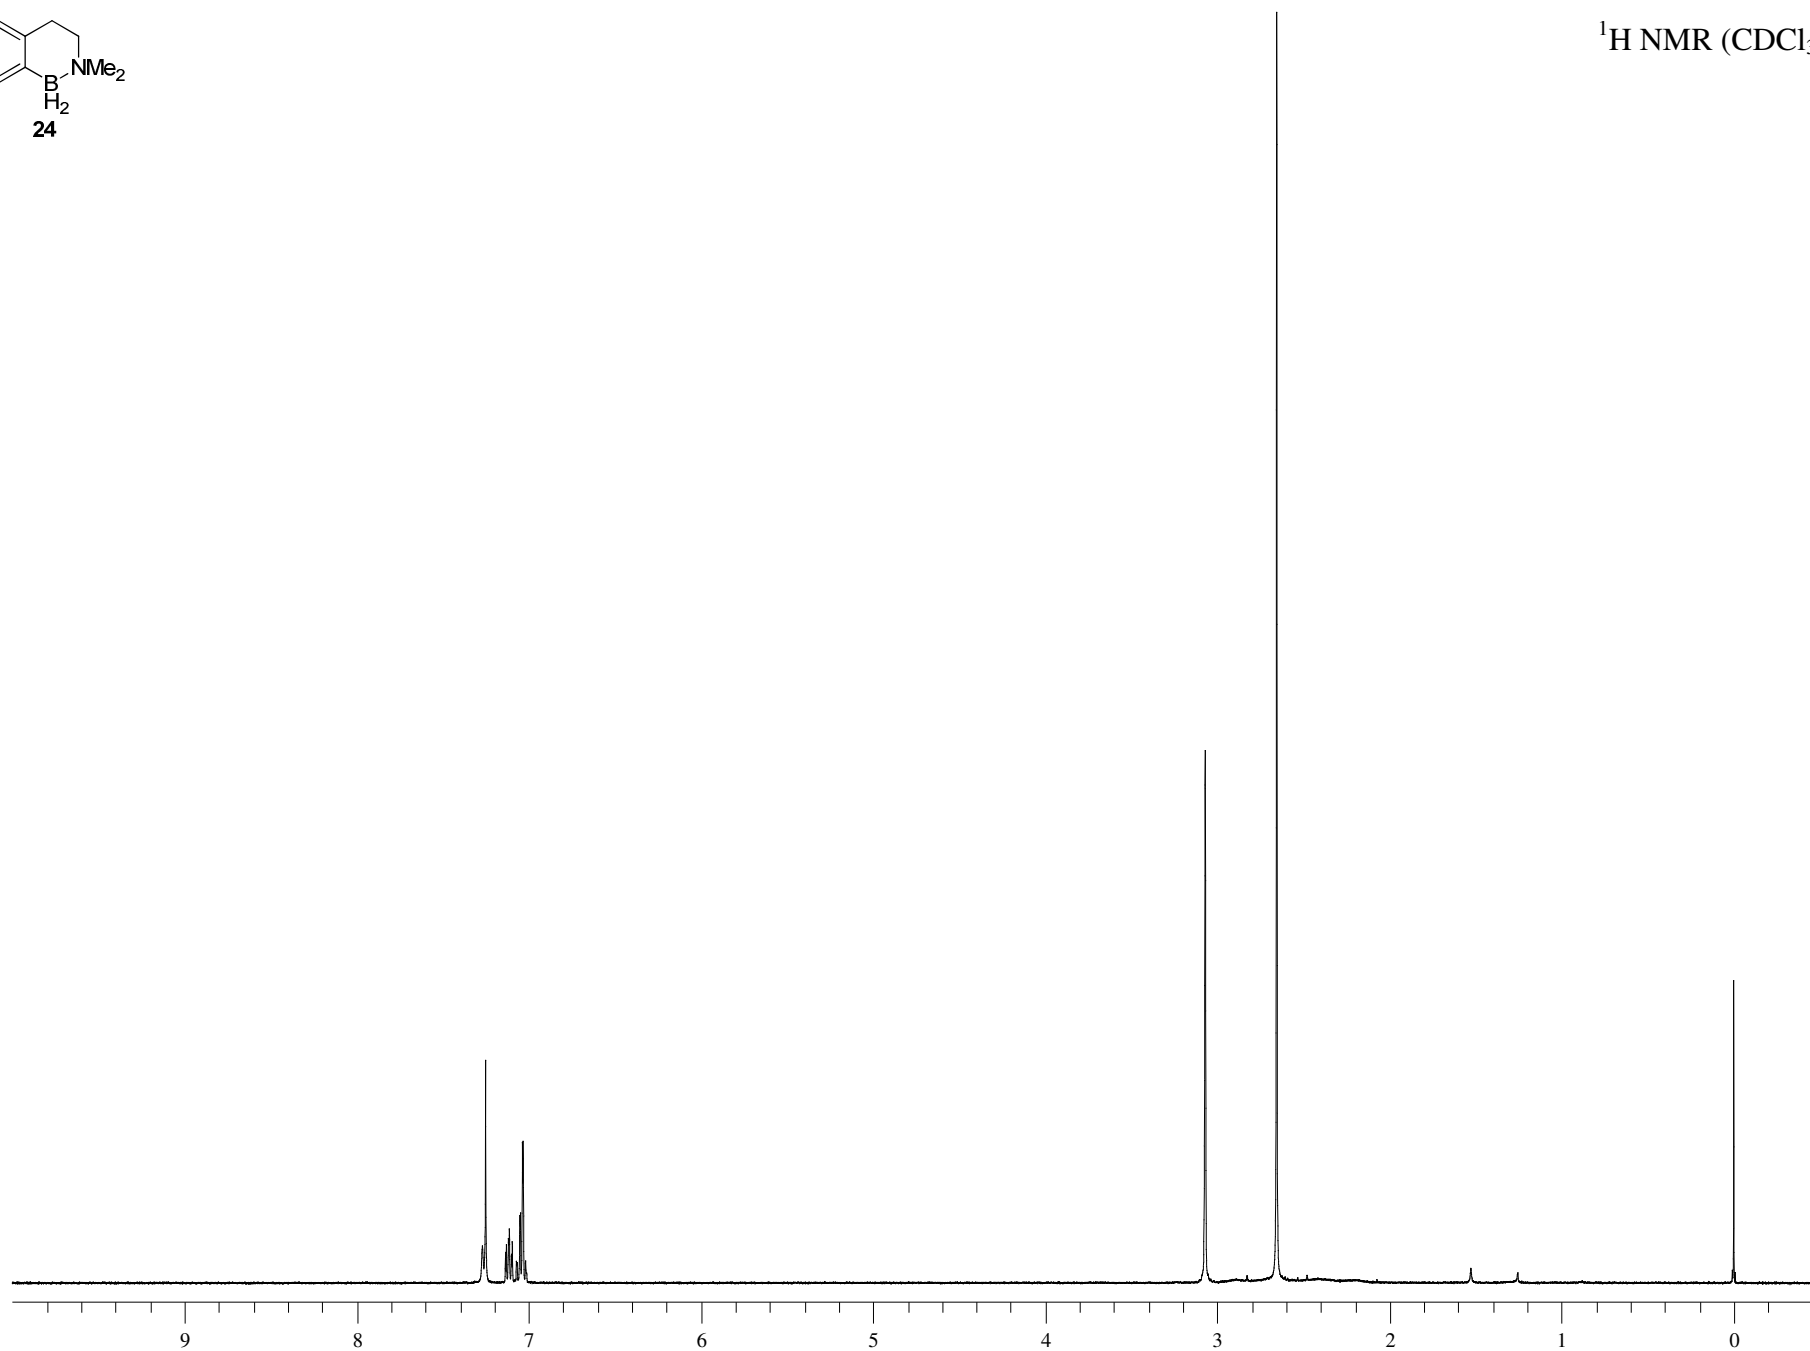

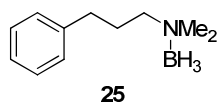

$^1\text{H NMR (CDCl}_3)$

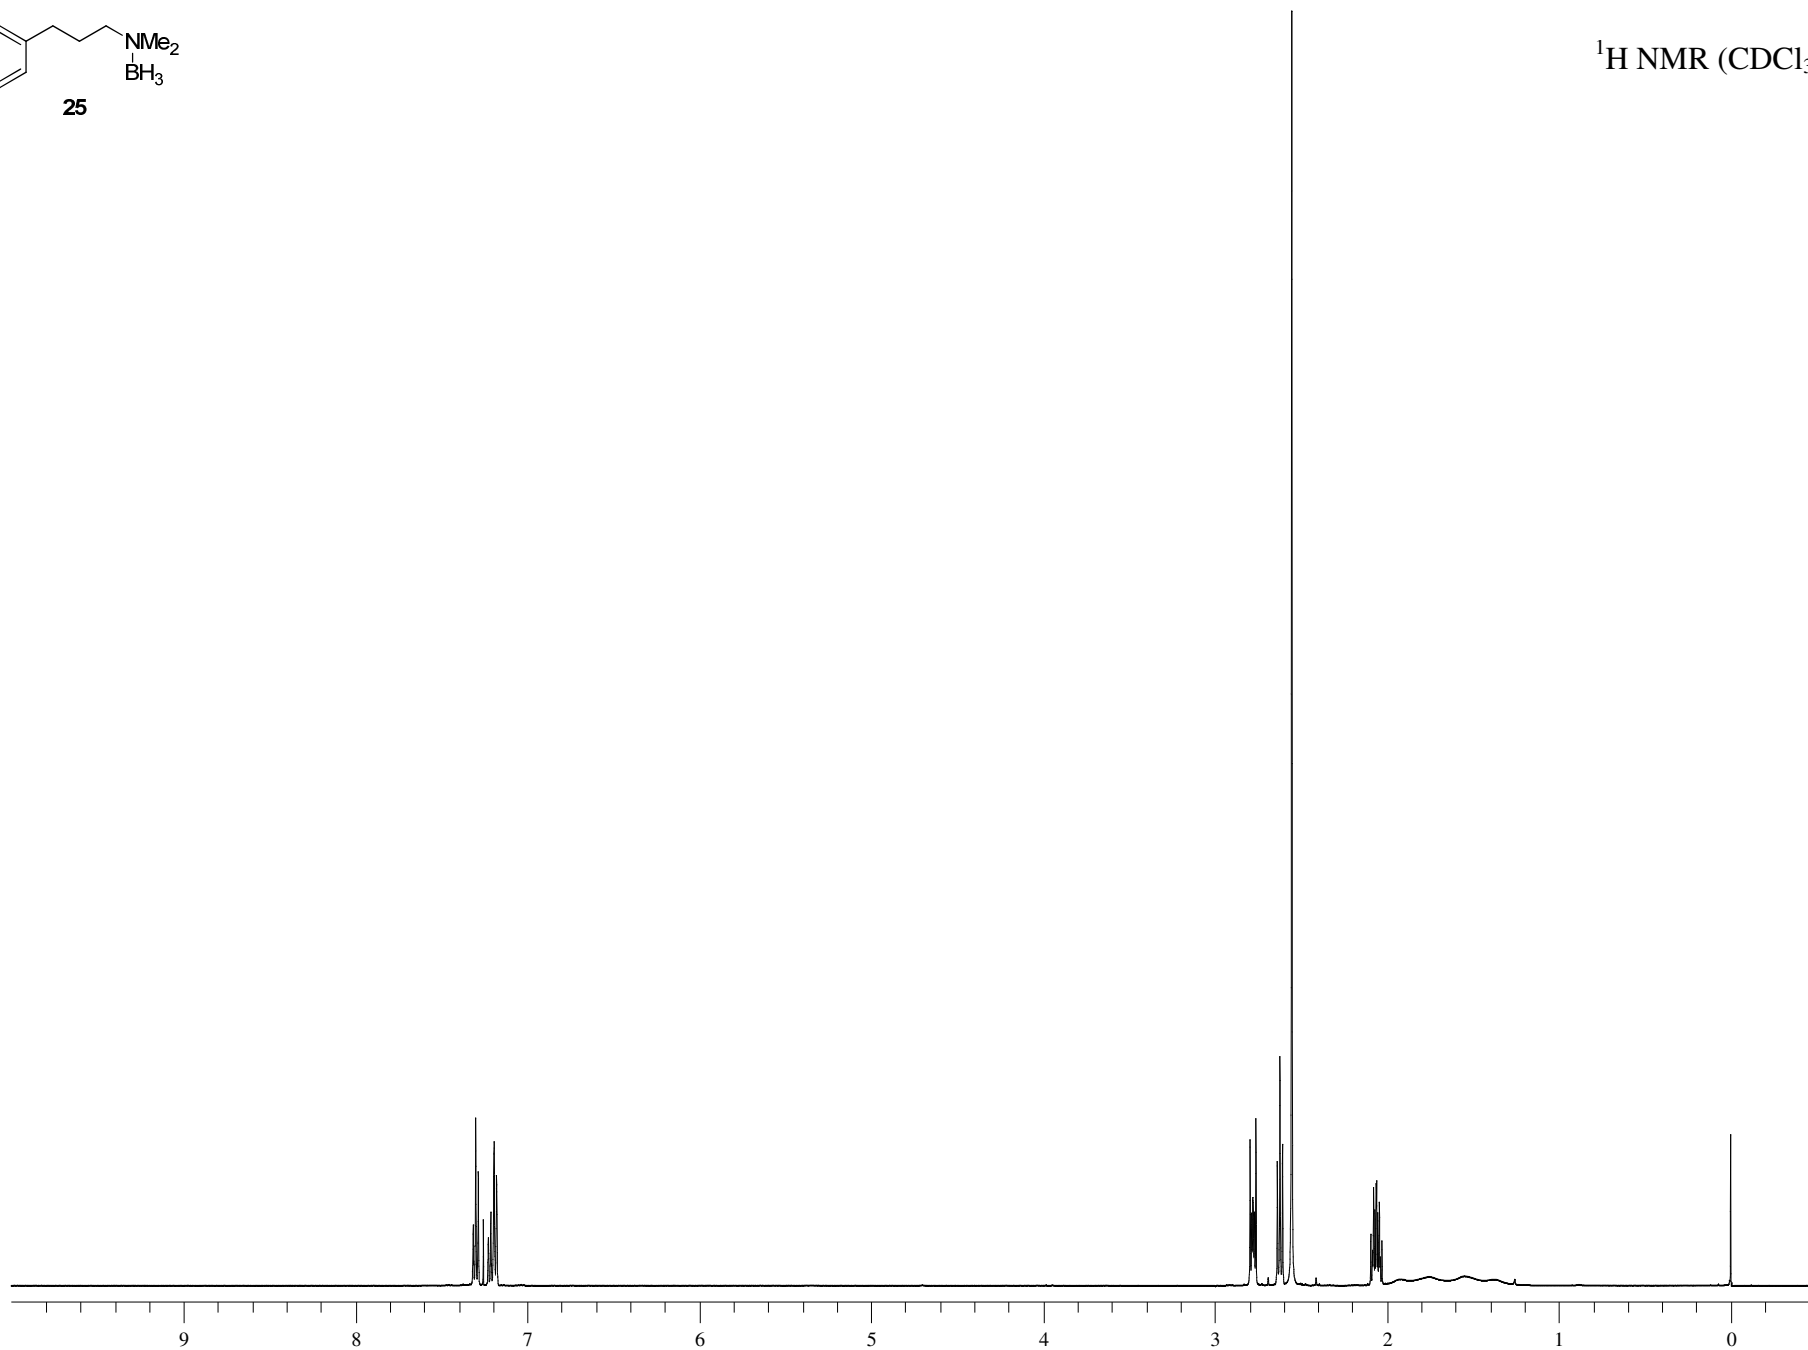



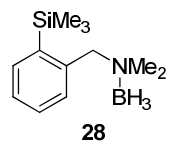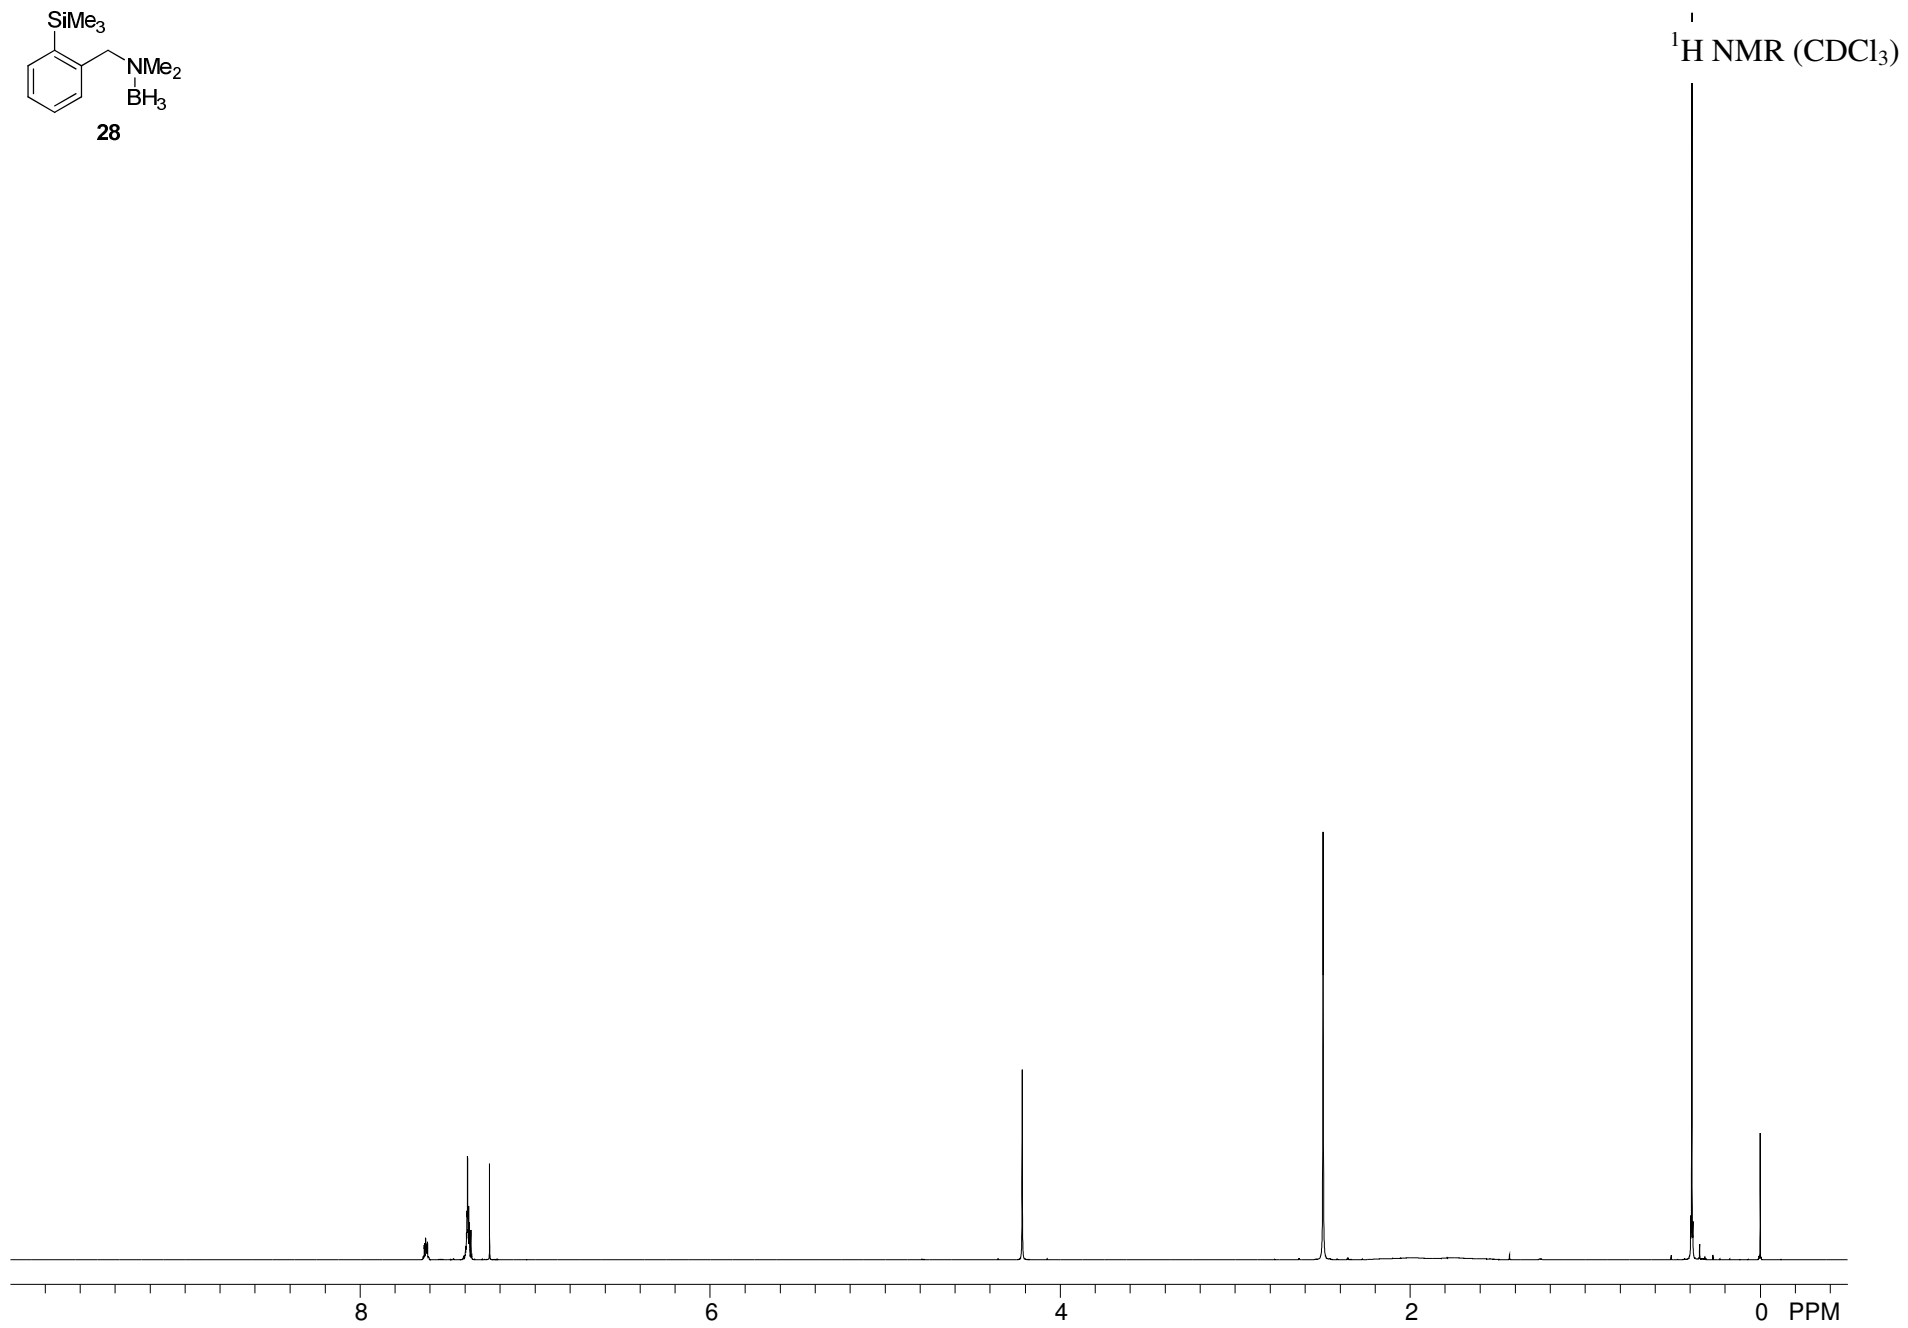

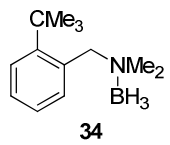

$^1\text{H NMR (CDCl}_3)$

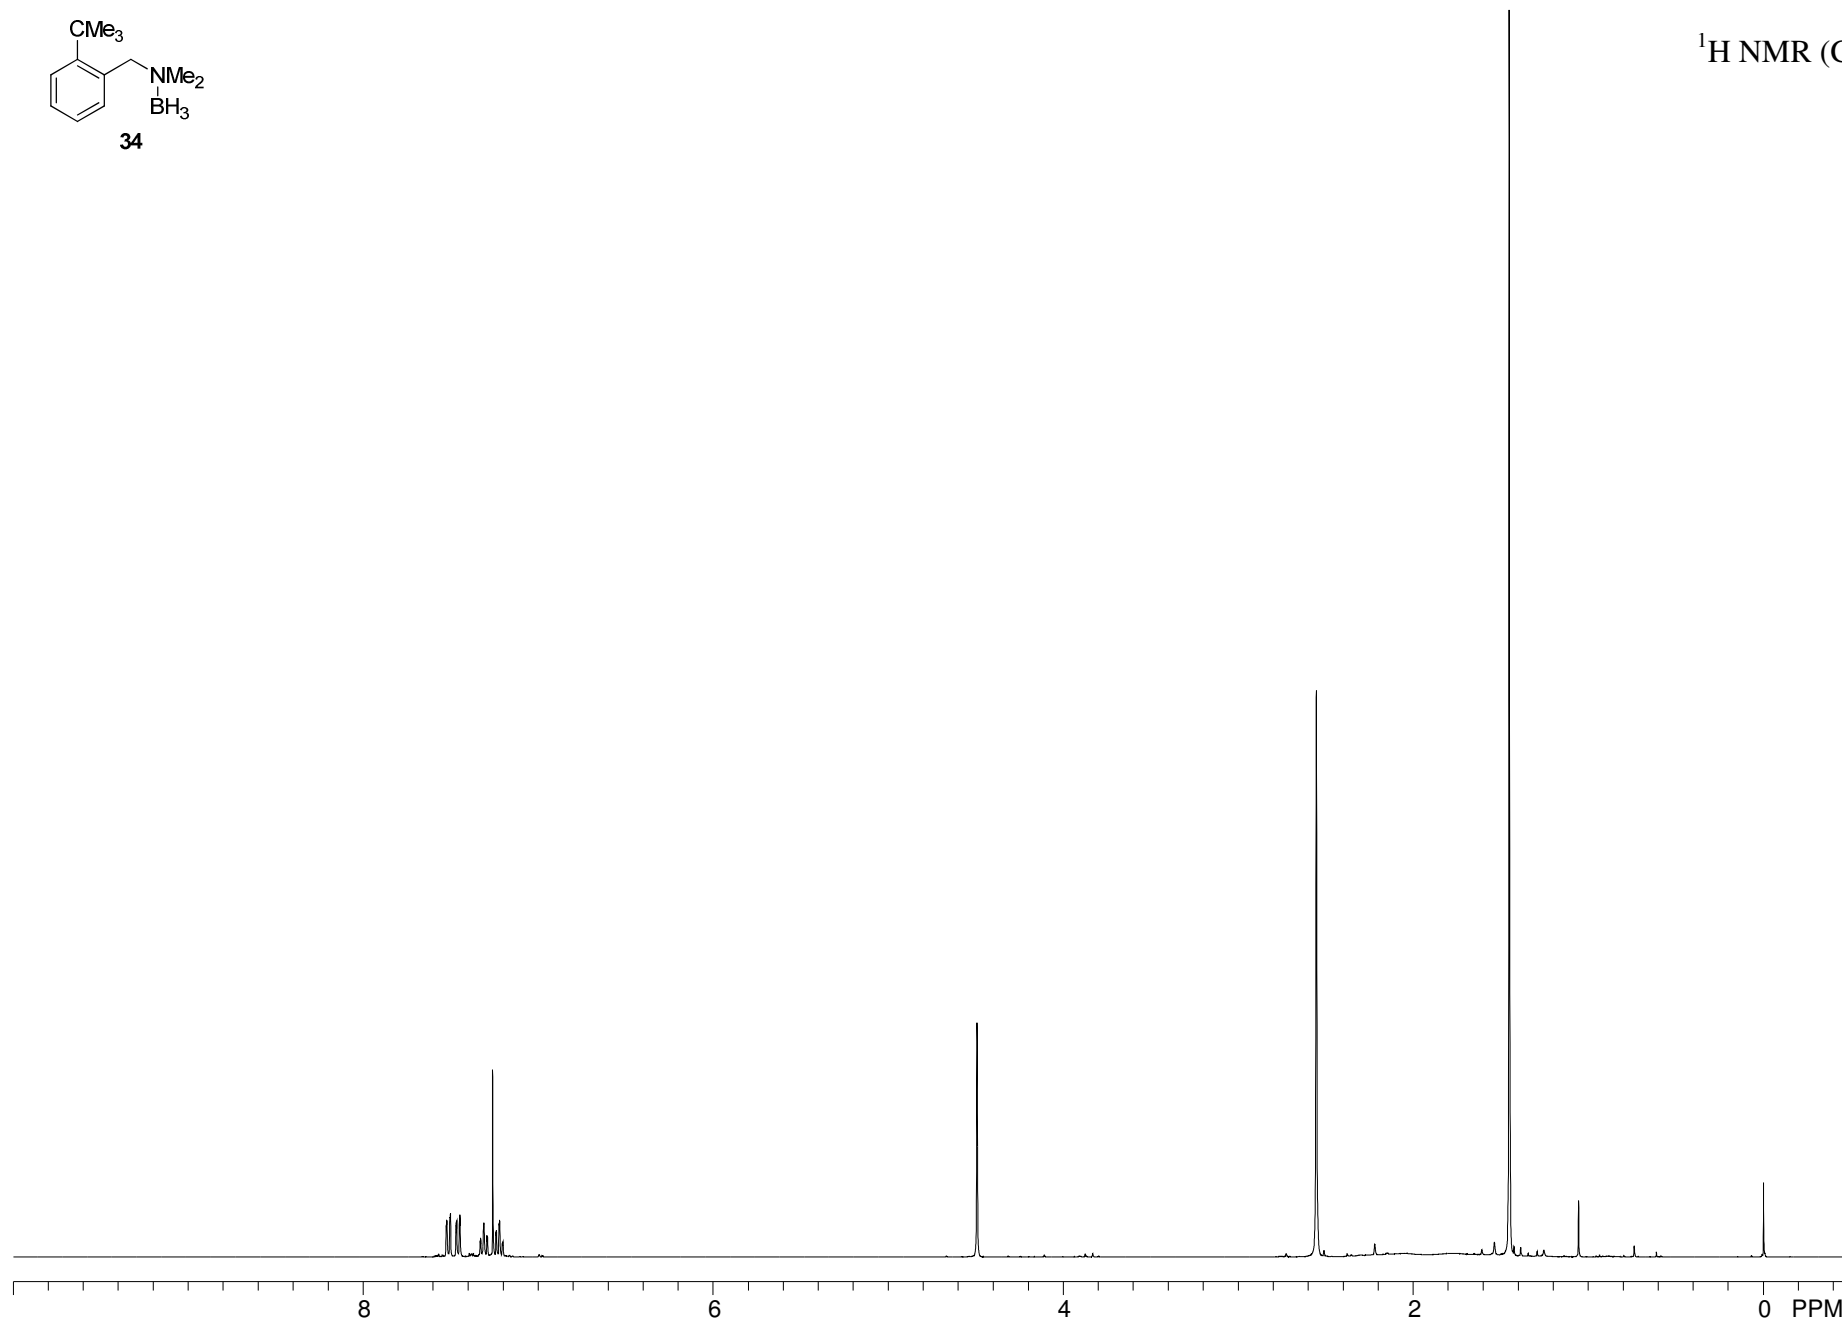

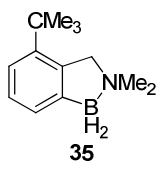

<sup>1</sup>H NMR (CDCl<sub>3</sub>)

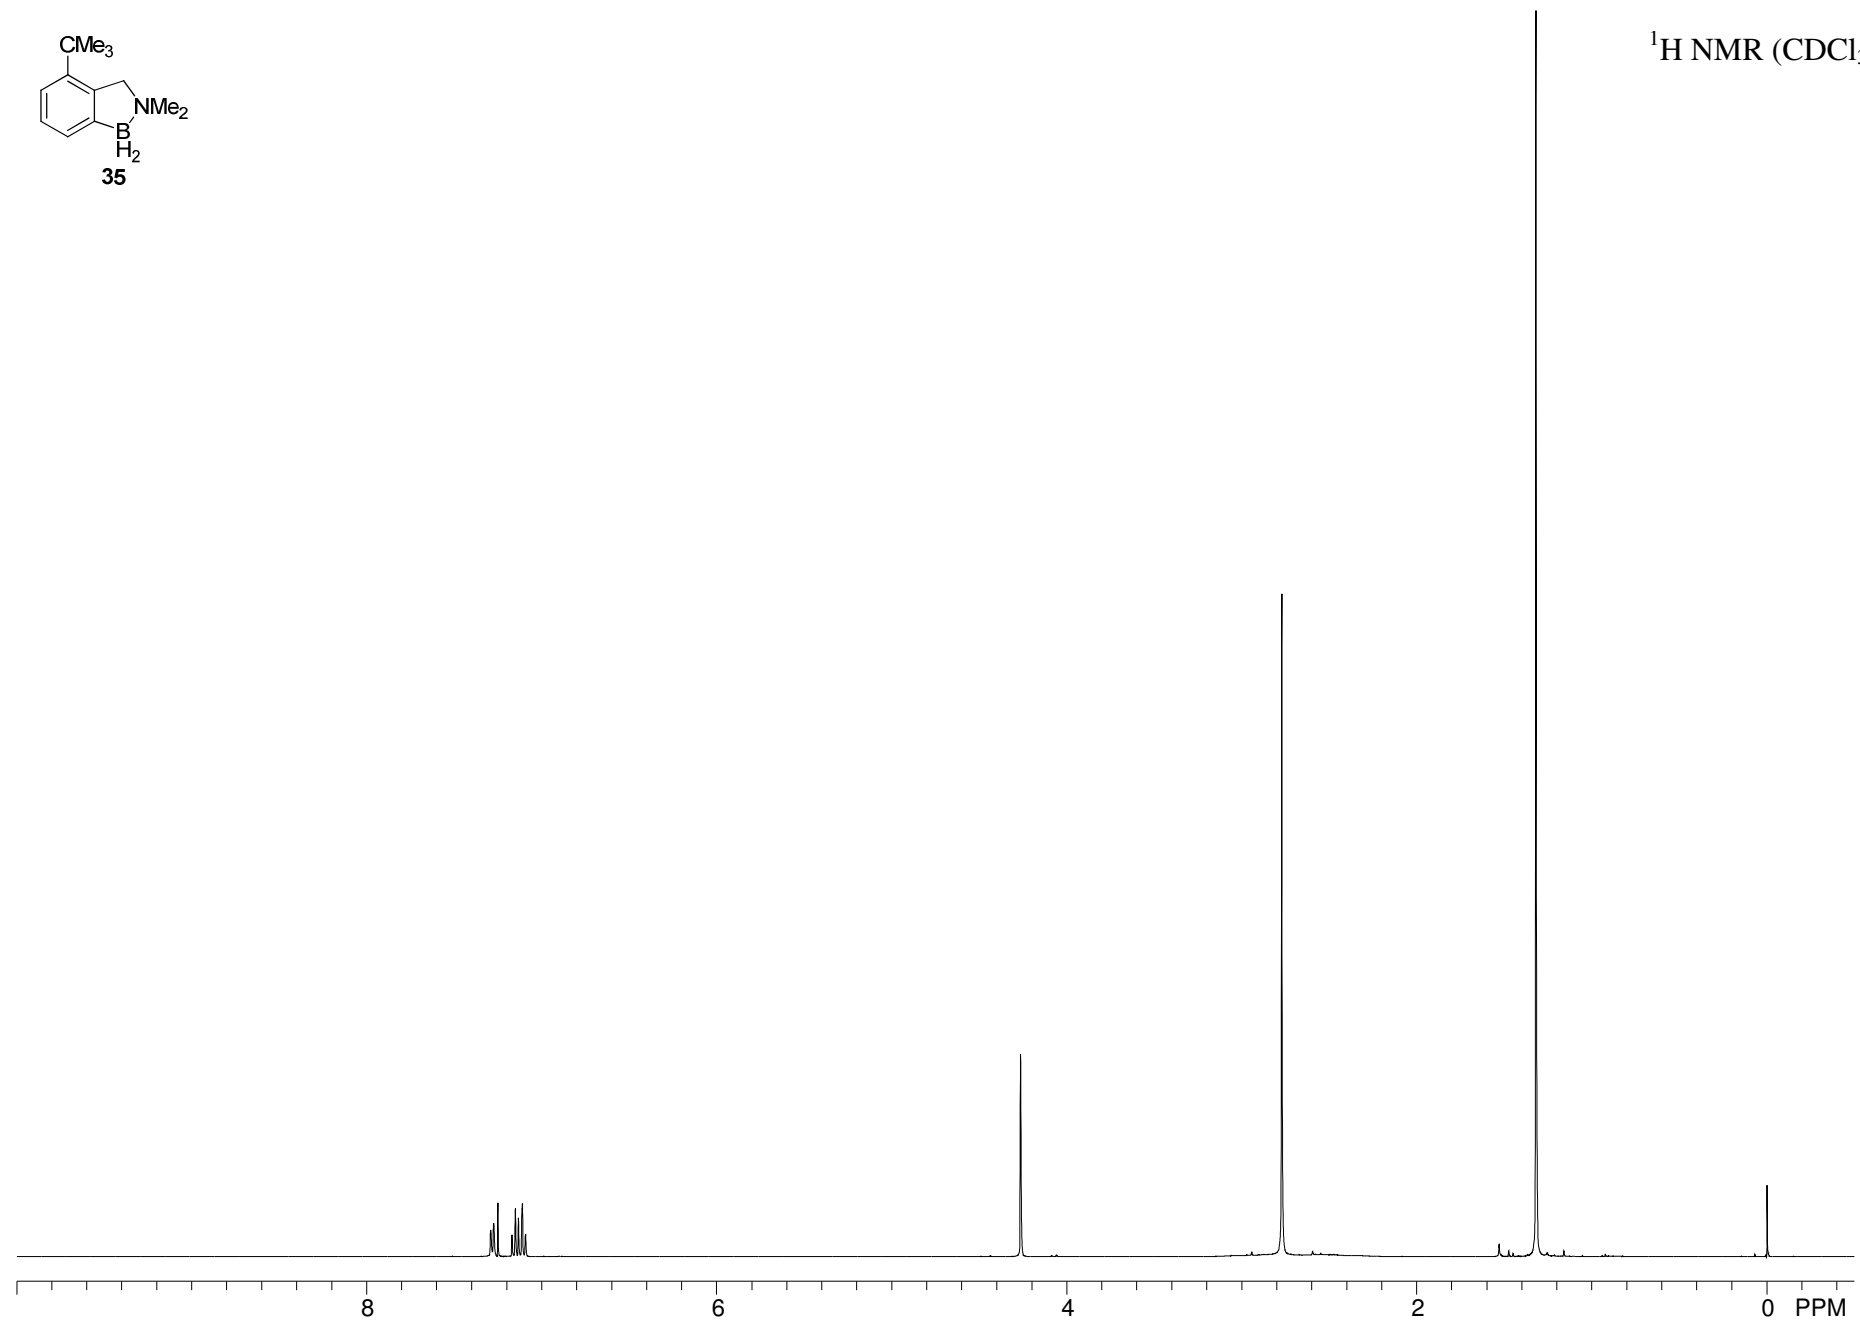

$^1\text{H NMR}$  ( $\text{CDCl}_3$ )

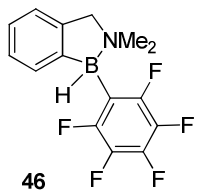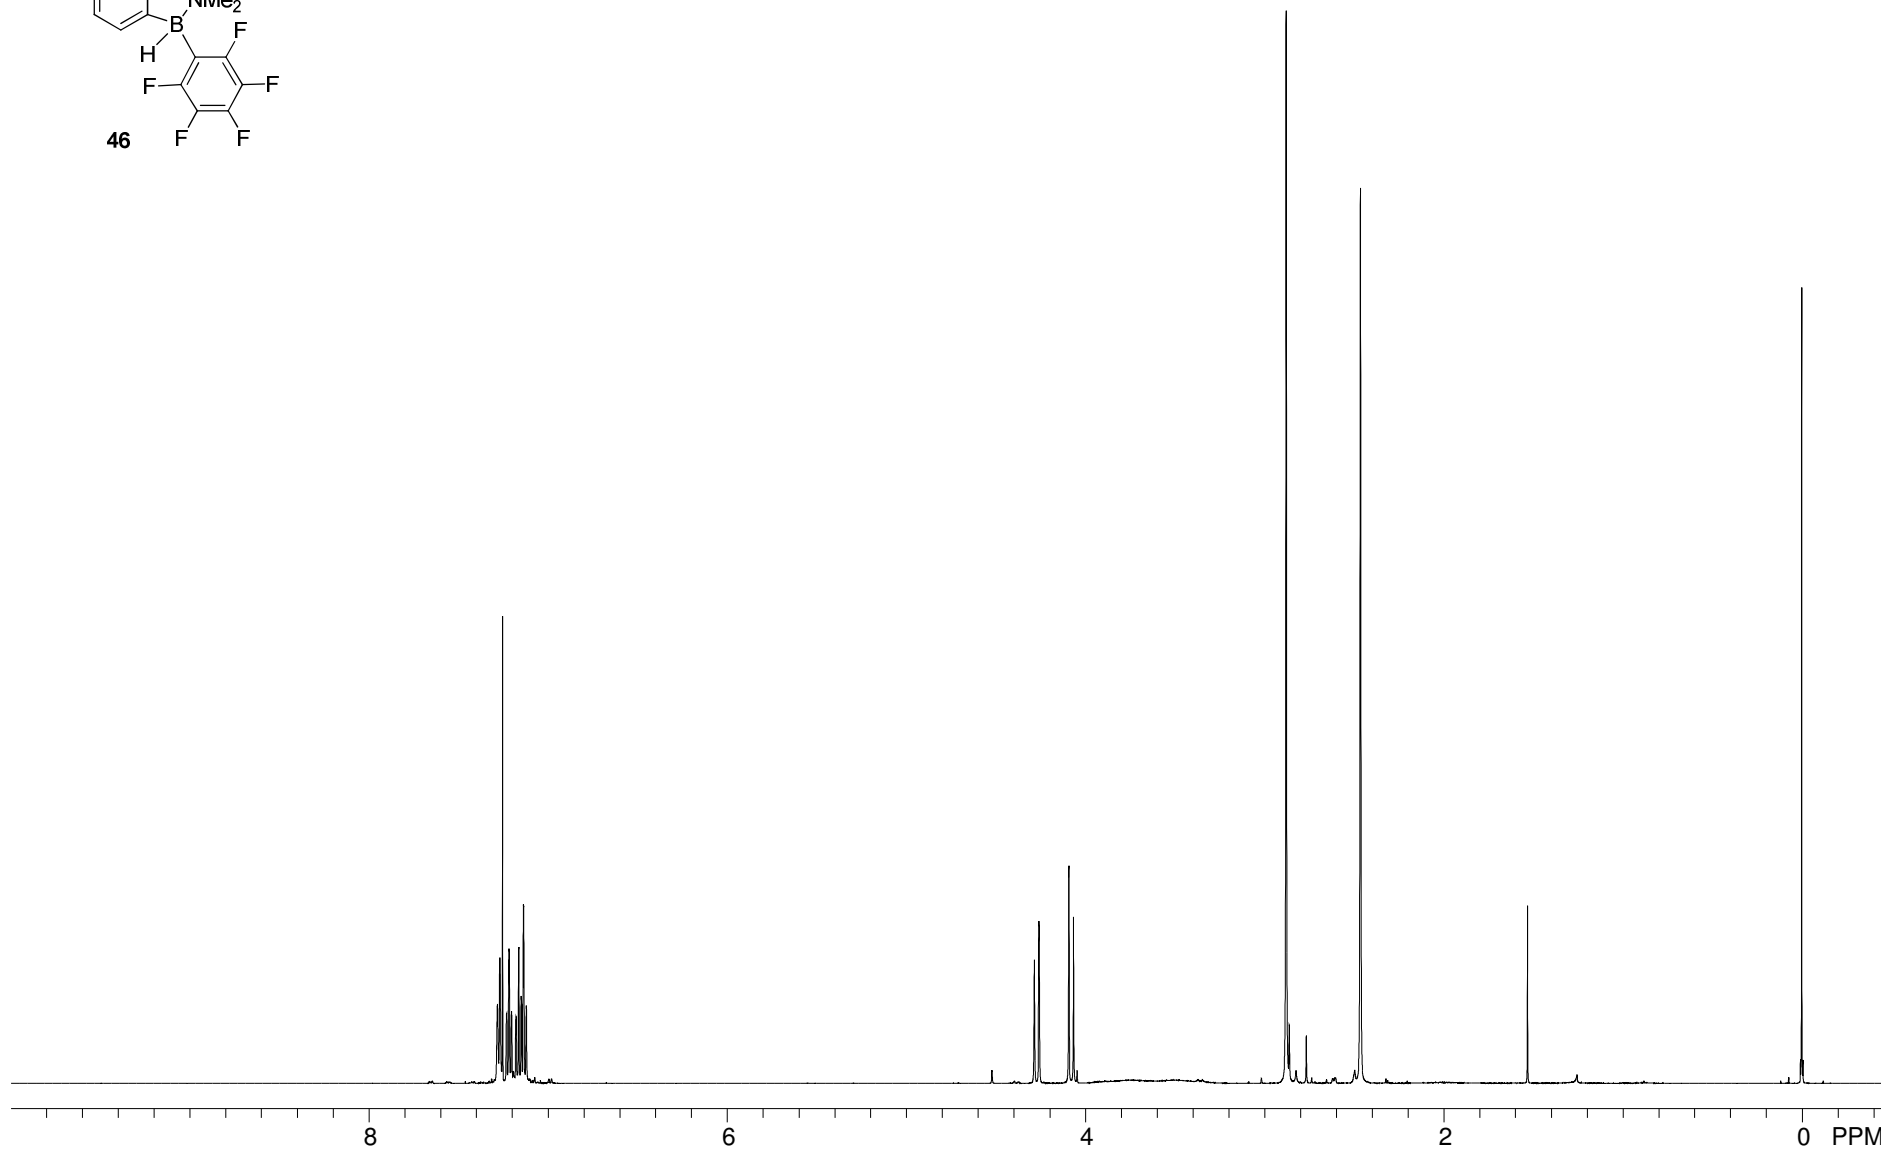

Supplement: NIHMS149299-supplement-1_si_001.pdf [file NIHMS149299-supplement-1_si_001.pdf]
